# Supplementary material for: Characteristics and expression profiles of circRNAs during abdominal adipose tissue development in Chinese Gushi chickens
Source: PubMed Central journal article supplement (PMC8049301; doi:10.1371/journal.pone.0249288), 2021-04-15
Supplement: pone.0249288.s010.pdf [file pone.0249288.s010.pdf]

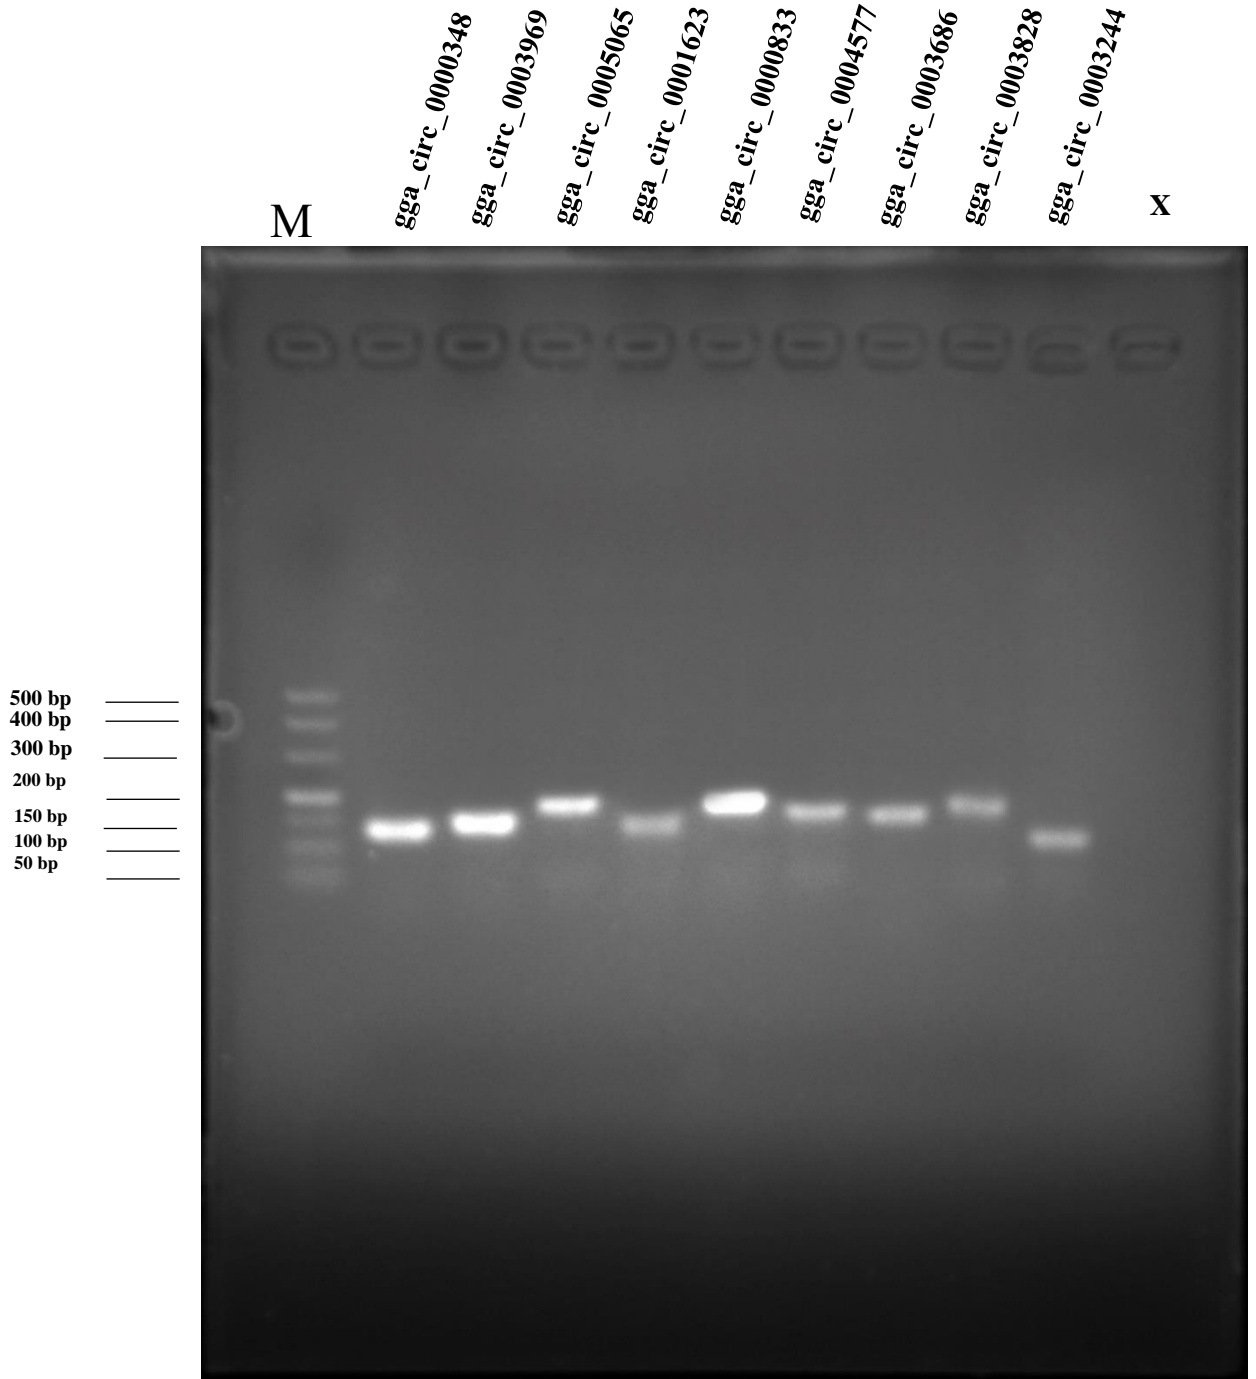

Note: This image is the original gel image of Figure 1A, taken by a gel imager. The sequence of experimental samples is shown in the figure. M represents DNA marker, X represents blank lane.

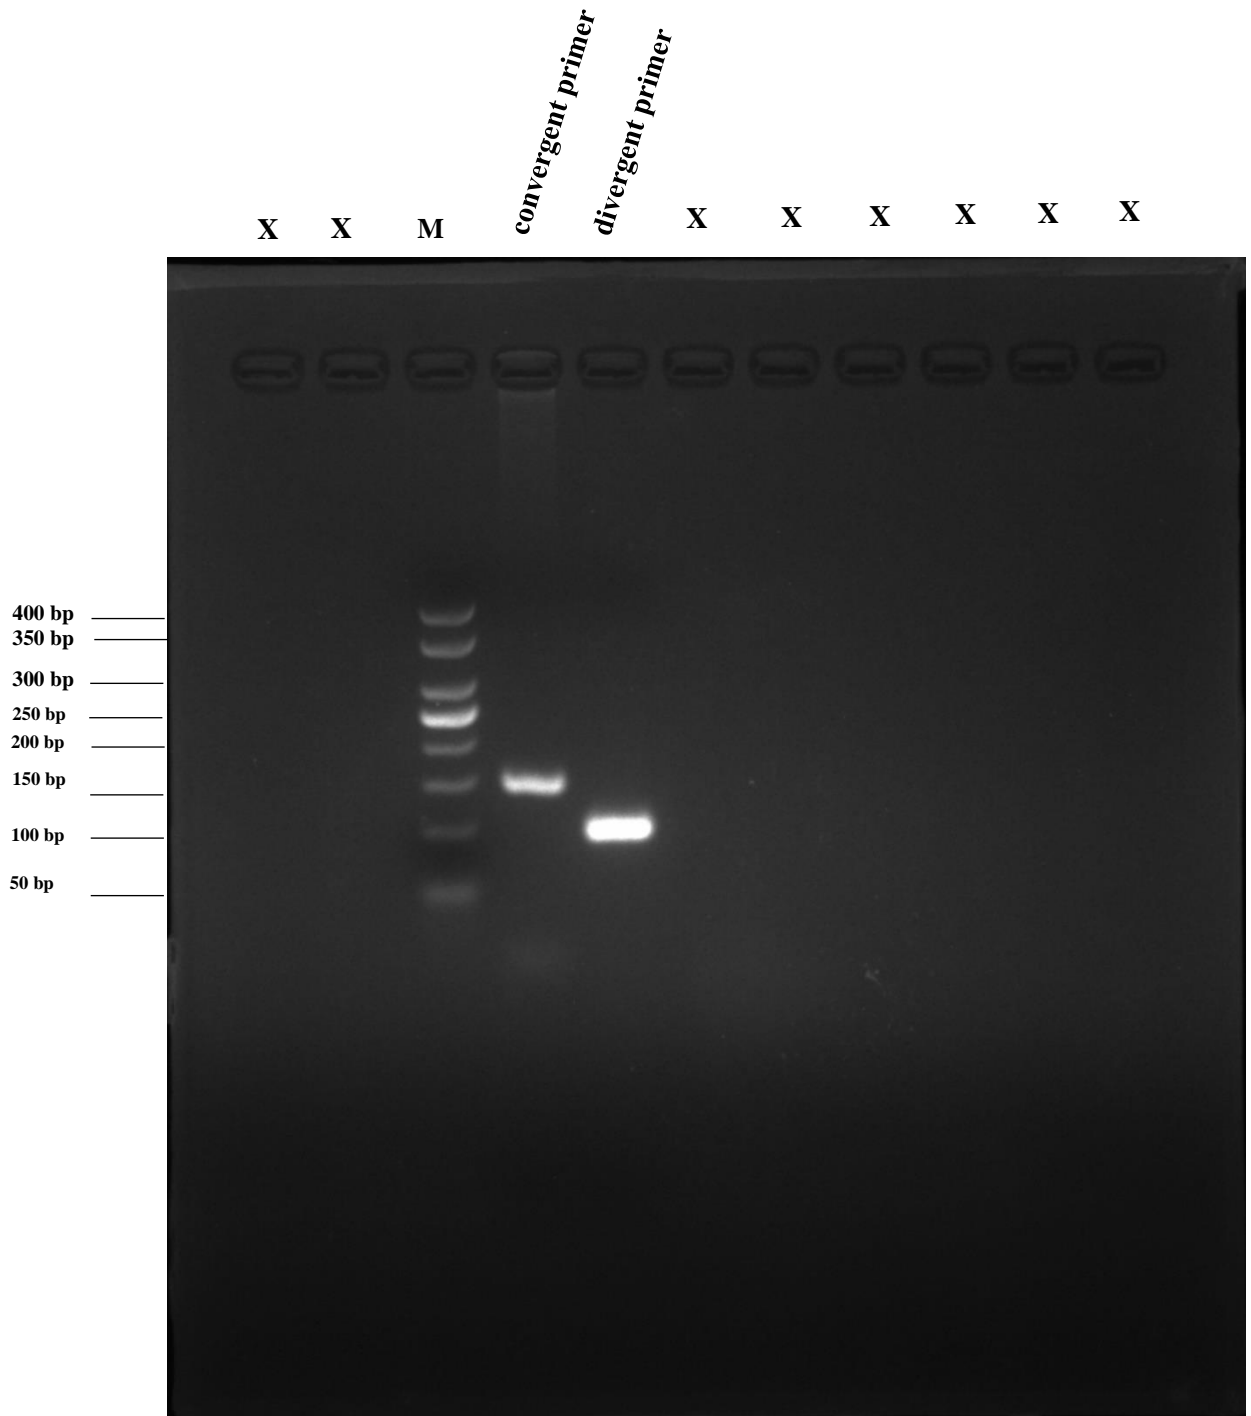

Note: This is the original gel image of Figure 9A, taken by a gel imager. The target bands were amplified by the convergent and divergent primer of *gga\_circ\_0002520*, respectively. M represents DNA marker, X represents blank lane.
