# Supplementary material for: Characteristics and expression profiles of circRNAs during abdominal adipose tissue development in Chinese Gushi chickens
Source: PLoS One. 2021 Apr 15;16(4):e0249288. doi: 10.1371/journal.pone.0249288 (PMC8049301; doi:10.1371/journal.pone.0249288)
Supplement: S3 File — (XLSX) [file pone.0249288.s009.xlsx]

## Sheet: Sheet1
S3 File. The binding site analysis of miRNAs on the circRNAs.
miRNA ID	circRNA ID	Total binding site score	Total energy	Highest score	Lowest energy	Strand	miRNA length	circRNA length	Binding site
gga-miR-29a-5p	gga_circ_0000212	145	-13.87	145	-13.87	117	22	337	264
gga-miR-29a-5p	gga_circ_0000234	143	-15.6	143	-15.6	123	22	276	174
gga-miR-29a-5p	gga_circ_0001280	162	-18.34	162	-18.34	217	22	401	59
gga-miR-29a-5p	gga_circ_0001115	140	-12.87	140	-12.87	273	22	117	83
gga-miR-29a-5p	gga_circ_0001116	140	-12.87	140	-12.87	275	22	364	83
gga-miR-29a-5p	gga_circ_0008823	153	-15.07	153	-15.07	385	22	406	27
gga-miR-29a-5p	gga_circ_0008886	149	-11.44	149	-11.44	403	22	352	207
gga-miR-29a-5p	gga_circ_0008930	164	-18.01	164	-18.01	423	22	120	85
gga-miR-29a-5p	gga_circ_0009031	166	-17.24	166	-17.24	465	22	325	125
gga-miR-29a-5p	gga_circ_0009090	150	-11.24	150	-11.24	487	22	441	330
gga-miR-29a-5p	gga_circ_0009123	150	-19.65	150	-19.65	499	22	263	36
gga-miR-29a-5p	gga_circ_0000656	147	-17.46	147	-17.46	549	22	322	91
gga-miR-29a-5p	gga_circ_0000736	159	-11.1	159	-11.1	575	22	345	54
gga-miR-29a-5p	gga_circ_0001360	146	-12.62	146	-12.62	615	22	378	116
gga-miR-29a-5p	gga_circ_0000113	160	-12.82	160	-12.82	679	22	370	59
gga-miR-29a-5p	gga_circ_0003437	157	-19.12	157	-19.12	823	22	274	7
gga-miR-29a-5p	gga_circ_0007473	153	-13.99	153	-13.99	905	22	402	316
gga-miR-29a-5p	gga_circ_0007491	159	-14.01	159	-14.01	907	22	357	225
gga-miR-29a-5p	gga_circ_0006232	155	-16.03	155	-16.03	1053	22	105	23
gga-miR-29a-5p	gga_circ_0006252	140	-16.06	140	-16.06	1065	22	320	77
gga-miR-29a-5p	gga_circ_0006258	149	-10.24	149	-10.24	1069	22	268	77
gga-miR-29a-5p	gga_circ_0006279	142	-11.55	142	-11.55	1075	22	542	12
gga-miR-29a-5p	gga_circ_0006325	154	-18.08	154	-18.08	1087	22	284	45
gga-miR-29a-5p	gga_circ_0006511	148	-13.28	148	-13.28	1153	22	446	1
gga-miR-29a-5p	gga_circ_0006512	143	-11.44	143	-11.44	1155	22	443	1
gga-miR-29a-5p	gga_circ_0000050	140	-11.03	140	-11.03	1273	22	488	1
gga-miR-29a-5p	gga_circ_0008699	145	-13.89	145	-13.89	1277	22	357	325
gga-miR-29a-5p	gga_circ_0003754	147	-10.69	147	-10.69	1417	22	412	10
gga-miR-29a-5p	gga_circ_0008073	147	-10.98	147	-10.98	1543	22	280	231
gga-miR-29a-5p	gga_circ_0006853	168	-18.85	168	-18.85	1589	22	693	305
gga-miR-29a-5p	gga_circ_0006890	158	-18.69	158	-18.69	1597	22	569	212
gga-miR-29a-5p	gga_circ_0007061	148	-13.93	148	-13.93	1667	22	151	62
gga-miR-29a-5p	gga_circ_0007170	152	-18.93	152	-18.93	1701	22	520	210
gga-miR-29a-5p	gga_circ_0007304	151	-11.28	151	-11.28	1767	22	499	444
gga-miR-29a-5p	gga_circ_0005060	160	-18.05	160	-18.05	1799	22	314	225
gga-miR-29a-5p	gga_circ_0005104	166	-18.77	166	-18.77	1829	22	349	62
gga-miR-29a-5p	gga_circ_0005185	143	-10.52	143	-10.52	1875	22	315	52
gga-miR-29a-5p	gga_circ_0005229	140	-11.91	140	-11.91	1899	22	619	443
gga-miR-29a-5p	gga_circ_0005230	140	-11.91	140	-11.91	1901	22	739	486
gga-miR-29a-5p	gga_circ_0005404	156	-16.88	156	-16.88	1953	22	550	377
gga-miR-29a-5p	gga_circ_0005408	156	-16.88	156	-16.88	1959	22	375	260
gga-miR-29a-5p	gga_circ_0005409	156	-16.88	156	-16.88	1961	22	315	142
gga-miR-29a-5p	gga_circ_0005412	156	-16.88	156	-16.88	1965	22	288	115
gga-miR-29a-5p	gga_circ_0005446	152	-11.24	152	-11.24	1973	22	468	299
gga-miR-29a-5p	gga_circ_0005492	159	-11.77	159	-11.77	1987	22	426	352
gga-miR-29a-5p	gga_circ_0005496	159	-11.77	159	-11.77	1989	22	318	244
gga-miR-29a-5p	gga_circ_0005550	166	-15.05	166	-15.05	2025	22	303	229
gga-miR-29a-5p	gga_circ_0005649	159	-20.77	159	-20.77	2069	22	555	67
gga-miR-29a-5p	gga_circ_0005943	143	-15.55	143	-15.55	2203	22	396	209
gga-miR-29a-5p	gga_circ_0005945	143	-15.55	143	-15.55	2205	22	561	527
gga-miR-29a-5p	gga_circ_0006008	156	-14.67	156	-14.67	2243	22	318	280
gga-miR-29a-5p	gga_circ_0006101	140	-10.46	140	-10.46	2273	22	466	1
gga-miR-29a-5p	gga_circ_0003796	147	-21.16	147	-21.16	2287	22	426	252
gga-miR-29a-5p	gga_circ_0003870	154	-18.86	154	-18.86	2315	22	325	49
gga-miR-29a-5p	gga_circ_0003905	160	-13.39	160	-13.39	2327	22	460	108
gga-miR-29a-5p	gga_circ_0003914	146	-16.77	146	-16.77	2333	22	335	67
gga-miR-29a-5p	gga_circ_0003944	161	-15.21	161	-15.21	2349	22	367	162
gga-miR-29a-5p	gga_circ_0004009	149	-15.24	149	-15.24	2387	22	124	42
gga-miR-29a-5p	gga_circ_0004045	146	-11.87	146	-11.87	2407	22	284	260
gga-miR-29a-5p	gga_circ_0004149	162	-18.62	162	-18.62	2443	22	363	207
gga-miR-29a-5p	gga_circ_0004248	150	-10.73	150	-10.73	2477	22	390	247
gga-miR-29a-5p	gga_circ_0004386	141	-15.23	141	-15.23	2521	22	315	255
gga-miR-29a-5p	gga_circ_0004797	150	-10.81	150	-10.81	2677	22	322	197
gga-miR-29a-5p	gga_circ_0004939	151	-22.93	151	-22.93	2749	22	314	121
gga-miR-29a-5p	gga_circ_0004987	140	-15.81	140	-15.81	2759	22	269	163
gga-miR-29a-5p	gga_circ_0004998	154	-12.25	154	-12.25	2765	22	411	219
gga-miR-29a-5p	gga_circ_0001652	296	-33.79	154	-21.83	2811	22	1842	720 1288
gga-miR-29a-5p	gga_circ_0001841	155	-15.46	155	-15.46	2877	22	433	135
gga-miR-29a-5p	gga_circ_0001984	156	-13.93	156	-13.93	2927	22	349	154
gga-miR-29a-5p	gga_circ_0002208	149	-18.92	149	-18.92	3013	22	527	86
gga-miR-29a-5p	gga_circ_0002678	161	-12.08	161	-12.08	3211	22	499	272
gga-miR-29a-5p	gga_circ_0002741	147	-15.21	147	-15.21	3233	22	336	87
gga-miR-29a-5p	gga_circ_0002777	161	-13.23	161	-13.23	3243	22	359	1
gga-miR-29a-5p	gga_circ_0002895	325	-27.36	166	-14.54	3283	22	623	284 256
gga-miR-29a-5p	gga_circ_0002897	325	-27.36	166	-14.54	3285	22	643	284 256
gga-miR-29a-5p	gga_circ_0003106	151	-12.74	151	-12.74	3371	22	828	659
gga-miR-29a-5p	gga_circ_0003140	147	-16.37	147	-16.37	3387	22	309	81
gga-miR-29a-5p	gga_circ_0003181	148	-12.33	148	-12.33	3405	22	405	309
gga-miR-29a-5p	gga_circ_0003183	148	-12.33	148	-12.33	3407	22	307	211
gga-miR-29a-5p	gga_circ_0008569	162	-16.47	162	-16.47	3471	22	469	7
gga-miR-29a-5p	gga_circ_0008591	158	-13.93	158	-13.93	3475	22	185	89
gga-miR-29a-5p	gga_circ_0008658	162	-16.64	162	-16.64	3499	22	378	100
gga-miR-29a-3p	gga_circ_0000791	157	-18.82	157	-18.82	3541	21	267	241
gga-miR-29a-3p	gga_circ_0000491	151	-17.51	151	-17.51	3609	21	303	9
gga-miR-29a-3p	gga_circ_0000198	141	-15.49	141	-15.49	3643	21	423	272
gga-miR-29a-3p	gga_circ_0000229	142	-18.85	142	-18.85	3655	21	466	374
gga-miR-29a-3p	gga_circ_0000357	140	-20.27	140	-20.27	3713	21	180	137
gga-miR-29a-3p	gga_circ_0008926	145	-13.87	145	-13.87	3955	21	409	1
gga-miR-29a-3p	gga_circ_0008975	148	-16.35	148	-16.35	3977	21	354	269
gga-miR-29a-3p	gga_circ_0008995	141	-12.12	141	-12.12	3983	21	441	1
gga-miR-29a-3p	gga_circ_0001483	144	-20.41	144	-20.41	4179	21	119	48
gga-miR-29a-3p	gga_circ_0001484	144	-20.41	144	-20.41	4181	21	293	48
gga-miR-29a-3p	gga_circ_0001521	153	-19.95	153	-19.95	4197	21	354	98
gga-miR-29a-3p	gga_circ_0000110	157	-15.75	157	-15.75	4211	21	346	183
gga-miR-29a-3p	gga_circ_0000113	157	-15.75	157	-15.75	4213	21	370	207
gga-miR-29a-3p	gga_circ_0000114	157	-15.75	157	-15.75	4215	21	193	30
gga-miR-29a-3p	gga_circ_0008223	149	-13.76	149	-13.76	4243	21	284	171
gga-miR-29a-3p	gga_circ_0008224	149	-13.76	149	-13.76	4245	21	496	383
gga-miR-29a-3p	gga_circ_0008295	141	-15.35	141	-15.35	4263	21	290	198
gga-miR-29a-3p	gga_circ_0008467	148	-19.96	148	-19.96	4323	21	363	90
gga-miR-29a-3p	gga_circ_0003491	146	-17.98	146	-17.98	4383	21	597	57
gga-miR-29a-3p	gga_circ_0003493	146	-17.98	146	-17.98	4385	21	413	57
gga-miR-29a-3p	gga_circ_0007706	160	-21.24	160	-21.24	4513	21	255	32
gga-miR-29a-3p	gga_circ_0007716	167	-20.94	167	-20.94	4517	21	322	199
gga-miR-29a-3p	gga_circ_0006245	151	-14.38	151	-14.38	4593	21	447	22
gga-miR-29a-3p	gga_circ_0006247	151	-14.38	151	-14.38	4595	21	216	22
gga-miR-29a-3p	gga_circ_0006248	151	-14.38	151	-14.38	4597	21	342	22
gga-miR-29a-3p	gga_circ_0006279	141	-17.5	141	-17.5	4609	21	542	5
gga-miR-29a-3p	gga_circ_0006383	140	-17.3	140	-17.3	4641	21	228	119
gga-miR-29a-3p	gga_circ_0006549	146	-13.35	146	-13.35	4695	21	193	137
gga-miR-29a-3p	gga_circ_0006611	149	-16.32	149	-16.32	4721	21	291	80
gga-miR-29a-3p	gga_circ_0006816	144	-17.36	144	-17.36	4791	21	252	46
gga-miR-29a-3p	gga_circ_0000033	140	-17.67	140	-17.67	4831	21	264	147
gga-miR-29a-3p	gga_circ_0003529	140	-19.07	140	-19.07	4889	21	260	26
gga-miR-29a-3p	gga_circ_0003764	140	-14.77	140	-14.77	4957	21	252	26
gga-miR-29a-3p	gga_circ_0003765	140	-14.77	140	-14.77	4959	21	400	26
gga-miR-29a-3p	gga_circ_0003785	297	-38.42	152	-19.93	4975	21	495	462 142
gga-miR-29a-3p	gga_circ_0007911	147	-16.12	147	-16.12	5015	21	464	1
gga-miR-29a-3p	gga_circ_0007064	140	-15.37	140	-15.37	5203	21	153	127
gga-miR-29a-3p	gga_circ_0007108	143	-21.45	143	-21.45	5215	21	206	175
gga-miR-29a-3p	gga_circ_0007151	154	-21.8	154	-21.8	5231	21	224	164
gga-miR-29a-3p	gga_circ_0005138	146	-12.87	146	-12.87	5373	21	573	191
gga-miR-29a-3p	gga_circ_0005140	146	-12.87	146	-12.87	5375	21	661	279
gga-miR-29a-3p	gga_circ_0005416	148	-14.72	148	-14.72	5501	21	544	189
gga-miR-29a-3p	gga_circ_0005720	143	-14.46	143	-14.46	5637	21	291	156
gga-miR-29a-3p	gga_circ_0005846	149	-16.2	149	-16.2	5691	21	655	302
gga-miR-29a-3p	gga_circ_0005999	151	-12.39	151	-12.39	5775	21	329	151
gga-miR-29a-3p	gga_circ_0003800	150	-17.61	150	-17.61	5825	21	407	355
gga-miR-29a-3p	gga_circ_0003941	150	-16.18	150	-16.18	5879	21	344	53
gga-miR-29a-3p	gga_circ_0004042	155	-14.01	155	-14.01	5937	21	396	1
gga-miR-29a-3p	gga_circ_0004043	155	-14.01	155	-14.01	5939	21	193	1
gga-miR-29a-3p	gga_circ_0004331	142	-15.95	142	-15.95	6037	21	402	311
gga-miR-29a-3p	gga_circ_0004557	157	-18.43	157	-18.43	6135	21	537	62
gga-miR-29a-3p	gga_circ_0004736	143	-13.46	143	-13.46	6185	21	224	157
gga-miR-29a-3p	gga_circ_0004737	143	-13.46	143	-13.46	6187	21	320	157
gga-miR-29a-3p	gga_circ_0004738	143	-13.46	143	-13.46	6189	21	376	157
gga-miR-29a-3p	gga_circ_0004938	144	-16.66	144	-16.66	6281	21	288	125
gga-miR-29a-3p	gga_circ_0004990	149	-18.18	149	-18.18	6295	21	603	294
gga-miR-29a-3p	gga_circ_0001597	145	-18.21	145	-18.21	6327	21	475	445
gga-miR-29a-3p	gga_circ_0001891	146	-14.99	146	-14.99	6435	21	667	294
gga-miR-29a-3p	gga_circ_0001894	146	-14.99	146	-14.99	6437	21	482	109
gga-miR-29a-3p	gga_circ_0001953	159	-17.26	159	-17.26	6449	21	403	74
gga-miR-29a-3p	gga_circ_0002454	140	-15.21	140	-15.21	6637	21	221	155
gga-miR-29a-3p	gga_circ_0002483	145	-15.87	145	-15.87	6647	21	379	19
gga-miR-29a-3p	gga_circ_0002492	147	-16.79	147	-16.79	6657	21	423	383
gga-miR-29a-3p	gga_circ_0002509	140	-14.6	140	-14.6	6659	21	416	153
gga-miR-29a-3p	gga_circ_0002635	155	-18.17	155	-18.17	6733	21	421	181
gga-miR-29a-3p	gga_circ_0002691	159	-16.33	159	-16.33	6753	21	502	197
gga-miR-29a-3p	gga_circ_0002694	151	-22.06	151	-22.06	6755	21	770	666
gga-miR-29a-3p	gga_circ_0002699	151	-22.06	151	-22.06	6759	21	681	577
gga-miR-29a-3p	gga_circ_0002881	147	-14.92	147	-14.92	6811	21	200	169
gga-miR-29a-3p	gga_circ_0002920	144	-18.72	144	-18.72	6825	21	442	382
gga-miR-29a-3p	gga_circ_0002935	155	-20.57	155	-20.57	6831	21	293	73
gga-miR-29a-3p	gga_circ_0002957	140	-14.41	140	-14.41	6837	21	379	343
gga-miR-29a-3p	gga_circ_0002958	140	-14.41	140	-14.41	6839	21	508	343
gga-miR-29a-3p	gga_circ_0003052	142	-15.92	142	-15.92	6879	21	354	296
gga-miR-29a-3p	gga_circ_0003207	148	-20.39	148	-20.39	6949	21	262	118
gga-miR-29b-1-5p	gga_circ_0000828	140	-13	140	-13	7087	25	426	350
gga-miR-29b-1-5p	gga_circ_0001320	161	-17.74	161	-17.74	7305	25	233	114
gga-miR-29b-1-5p	gga_circ_0001004	158	-17	158	-17	7399	25	449	165
gga-miR-29b-1-5p	gga_circ_0008779	150	-15.44	150	-15.44	7433	25	461	140
gga-miR-29b-1-5p	gga_circ_0008963	151	-16.81	151	-16.81	7503	25	371	1
gga-miR-29b-1-5p	gga_circ_0009008	147	-15.77	147	-15.77	7523	25	305	157
gga-miR-29b-1-5p	gga_circ_0009090	168	-21.88	168	-21.88	7555	25	441	196
gga-miR-29b-1-5p	gga_circ_0000691	143	-14.9	143	-14.9	7629	25	549	503
gga-miR-29b-1-5p	gga_circ_0000778	147	-15.39	147	-15.39	7657	25	183	24
gga-miR-29b-1-5p	gga_circ_0001339	141	-14.79	141	-14.79	7673	25	458	121
gga-miR-29b-1-5p	gga_circ_0001388	141	-11.09	141	-11.09	7689	25	204	1
gga-miR-29b-1-5p	gga_circ_0000146	146	-16.46	146	-16.46	7759	25	436	403
gga-miR-29b-1-5p	gga_circ_0008221	148	-22.58	148	-22.58	7775	25	369	291
gga-miR-29b-1-5p	gga_circ_0008224	150	-17.38	150	-17.38	7779	25	496	195
gga-miR-29b-1-5p	gga_circ_0008382	186	-29.55	186	-29.55	7827	25	349	272
gga-miR-29b-1-5p	gga_circ_0007463	158	-22.63	158	-22.63	7969	25	96	17
gga-miR-29b-1-5p	gga_circ_0007464	158	-22.63	158	-22.63	7971	25	345	17
gga-miR-29b-1-5p	gga_circ_0007606	148	-16.69	148	-16.69	8011	25	369	233
gga-miR-29b-1-5p	gga_circ_0007607	148	-16.69	148	-16.69	8013	25	636	500
gga-miR-29b-1-5p	gga_circ_0006134	149	-14.72	149	-14.72	8083	25	683	535
gga-miR-29b-1-5p	gga_circ_0006655	186	-31.04	186	-31.04	8277	25	310	140
gga-miR-29b-1-5p	gga_circ_0006767	151	-16.33	151	-16.33	8301	25	189	1
gga-miR-29b-1-5p	gga_circ_0006768	151	-16.33	151	-16.33	8303	25	454	84
gga-miR-29b-1-5p	gga_circ_0006774	151	-16.33	151	-16.33	8309	25	461	1
gga-miR-29b-1-5p	gga_circ_0006775	151	-16.33	151	-16.33	8311	25	544	84
gga-miR-29b-1-5p	gga_circ_0006779	151	-16.33	151	-16.33	8313	25	314	1
gga-miR-29b-1-5p	gga_circ_0006780	151	-16.33	151	-16.33	8315	25	397	84
gga-miR-29b-1-5p	gga_circ_0006818	152	-20.21	152	-20.21	8327	25	386	74
gga-miR-29b-1-5p	gga_circ_0003674	147	-16.03	147	-16.03	8377	25	183	25
gga-miR-29b-1-5p	gga_circ_0003636	154	-18.72	154	-18.72	8413	25	539	120
gga-miR-29b-1-5p	gga_circ_0003536	154	-20.42	154	-20.42	8427	25	359	324
gga-miR-29b-1-5p	gga_circ_0003768	159	-21.63	159	-21.63	8495	25	426	280
gga-miR-29b-1-5p	gga_circ_0008000	154	-16.56	154	-16.56	8583	25	272	120
gga-miR-29b-1-5p	gga_circ_0008039	154	-25.25	154	-25.25	8601	25	330	89
gga-miR-29b-1-5p	gga_circ_0008056	168	-26.1	168	-26.1	8607	25	470	246
gga-miR-29b-1-5p	gga_circ_0008108	149	-14.71	149	-14.71	8625	25	324	194
gga-miR-29b-1-5p	gga_circ_0008154	155	-25.81	155	-25.81	8637	25	321	107
gga-miR-29b-1-5p	gga_circ_0006942	156	-14.07	156	-14.07	8687	25	244	23
gga-miR-29b-1-5p	gga_circ_0007182	164	-18.78	164	-18.78	8771	25	297	127
gga-miR-29b-1-5p	gga_circ_0007298	150	-17.54	150	-17.54	8831	25	473	27
gga-miR-29b-1-5p	gga_circ_0005051	144	-11.12	144	-11.12	8863	25	339	1
gga-miR-29b-1-5p	gga_circ_0005144	155	-17.27	155	-17.27	8911	25	564	1
gga-miR-29b-1-5p	gga_circ_0005145	146	-18.76	146	-18.76	8913	25	152	34
gga-miR-29b-1-5p	gga_circ_0005254	163	-21.7	163	-21.7	8977	25	353	131
gga-miR-29b-1-5p	gga_circ_0005652	151	-15.86	151	-15.86	9139	25	330	114
gga-miR-29b-1-5p	gga_circ_0005716	167	-23.61	167	-23.61	9169	25	359	105
gga-miR-29b-1-5p	gga_circ_0005728	160	-18.19	160	-18.19	9177	25	252	49
gga-miR-29b-1-5p	gga_circ_0005783	147	-13.7	147	-13.7	9197	25	399	81
gga-miR-29b-1-5p	gga_circ_0005985	157	-19.54	157	-19.54	9301	25	513	186
gga-miR-29b-1-5p	gga_circ_0003867	147	-15.86	147	-15.86	9381	25	276	53
gga-miR-29b-1-5p	gga_circ_0003905	160	-16.5	160	-16.5	9395	25	460	303
gga-miR-29b-1-5p	gga_circ_0003968	168	-26.89	168	-26.89	9425	25	546	258
gga-miR-29b-1-5p	gga_circ_0003969	168	-26.89	168	-26.89	9427	25	649	258
gga-miR-29b-1-5p	gga_circ_0003989	158	-16.33	158	-16.33	9435	25	572	479
gga-miR-29b-1-5p	gga_circ_0003991	158	-16.33	158	-16.33	9437	25	237	144
gga-miR-29b-1-5p	gga_circ_0003992	158	-16.33	158	-16.33	9439	25	398	305
gga-miR-29b-1-5p	gga_circ_0003993	158	-16.33	158	-16.33	9441	25	319	226
gga-miR-29b-1-5p	gga_circ_0004149	151	-18.79	151	-18.79	9511	25	363	52
gga-miR-29b-1-5p	gga_circ_0004548	157	-20.91	157	-20.91	9665	25	449	7
gga-miR-29b-1-5p	gga_circ_0004565	141	-13.83	141	-13.83	9671	25	379	1
gga-miR-29b-1-5p	gga_circ_0004802	158	-21.21	158	-21.21	9749	25	454	84
gga-miR-29b-1-5p	gga_circ_0004812	151	-18.23	151	-18.23	9755	25	245	183
gga-miR-29b-1-5p	gga_circ_0004939	325	-37.43	163	-19.85	9817	25	314	182 164
gga-miR-29b-1-5p	gga_circ_0001865	154	-15.9	154	-15.9	9965	25	707	92
gga-miR-29b-1-5p	gga_circ_0002122	149	-11.93	149	-11.93	10043	25	177	34
gga-miR-29b-1-5p	gga_circ_0002168	148	-13.1	148	-13.1	10073	25	690	603
gga-miR-29b-1-5p	gga_circ_0002208	153	-17.52	153	-17.52	10081	25	527	276
gga-miR-29b-1-5p	gga_circ_0002273	158	-14.99	158	-14.99	10105	25	508	397
gga-miR-29b-1-5p	gga_circ_0002544	165	-18.93	165	-18.93	10223	25	294	23
gga-miR-29b-1-5p	gga_circ_0002600	146	-17.54	146	-17.54	10247	25	374	108
gga-miR-29b-1-5p	gga_circ_0003173	153	-16.36	153	-16.36	10469	25	353	192
gga-miR-29b-1-5p	gga_circ_0003228	168	-22.99	168	-22.99	10485	25	415	203
gga-miR-29b-1-5p	gga_circ_0003284	140	-21.31	140	-21.31	10503	25	453	86
gga-miR-29b-1-5p	gga_circ_0008507	151	-21.58	151	-21.58	10521	25	347	301
gga-miR-29b-1-5p	gga_circ_0008673	159	-18.89	159	-18.89	10575	25	318	214
gga-miR-29b-1-5p	gga_circ_0000100	155	-20.25	155	-20.25	10597	25	544	134
gga-miR-29b-3p	gga_circ_0000791	158	-20.29	158	-20.29	10609	23	267	240
gga-miR-29b-3p	gga_circ_0000491	152	-19.11	152	-19.11	10677	23	303	6
gga-miR-29b-3p	gga_circ_0000198	141	-18.12	141	-18.12	10711	23	423	270
gga-miR-29b-3p	gga_circ_0000229	142	-19.78	142	-19.78	10723	23	466	372
gga-miR-29b-3p	gga_circ_0000357	140	-16.81	140	-16.81	10781	23	180	135
gga-miR-29b-3p	gga_circ_0008926	145	-13.87	145	-13.87	11023	23	409	1
gga-miR-29b-3p	gga_circ_0008975	148	-19.27	148	-19.27	11045	23	354	267
gga-miR-29b-3p	gga_circ_0008995	141	-12.12	141	-12.12	11051	23	441	1
gga-miR-29b-3p	gga_circ_0001483	145	-18.73	145	-18.73	11247	23	119	46
gga-miR-29b-3p	gga_circ_0001484	145	-18.73	145	-18.73	11249	23	293	46
gga-miR-29b-3p	gga_circ_0001521	148	-18.22	148	-18.22	11265	23	354	96
gga-miR-29b-3p	gga_circ_0000110	156	-16.43	156	-16.43	11279	23	346	181
gga-miR-29b-3p	gga_circ_0000113	156	-16.43	156	-16.43	11281	23	370	205
gga-miR-29b-3p	gga_circ_0000114	156	-16.43	156	-16.43	11283	23	193	28
gga-miR-29b-3p	gga_circ_0008223	150	-14.86	150	-14.86	11311	23	284	169
gga-miR-29b-3p	gga_circ_0008224	150	-14.86	150	-14.86	11313	23	496	381
gga-miR-29b-3p	gga_circ_0008295	141	-18.73	141	-18.73	11331	23	290	196
gga-miR-29b-3p	gga_circ_0008467	155	-21.51	155	-21.51	11391	23	363	87
gga-miR-29b-3p	gga_circ_0003491	146	-16.67	146	-16.67	11451	23	597	55
gga-miR-29b-3p	gga_circ_0003493	146	-16.67	146	-16.67	11453	23	413	55
gga-miR-29b-3p	gga_circ_0007706	164	-21.13	164	-21.13	11581	23	255	30
gga-miR-29b-3p	gga_circ_0007716	165	-18.97	165	-18.97	11585	23	322	197
gga-miR-29b-3p	gga_circ_0006245	151	-15.06	151	-15.06	11661	23	447	20
gga-miR-29b-3p	gga_circ_0006247	151	-15.06	151	-15.06	11663	23	216	20
gga-miR-29b-3p	gga_circ_0006248	151	-15.06	151	-15.06	11665	23	342	20
gga-miR-29b-3p	gga_circ_0006279	145	-18.15	145	-18.15	11677	23	542	3
gga-miR-29b-3p	gga_circ_0006383	145	-19.21	145	-19.21	11709	23	228	117
gga-miR-29b-3p	gga_circ_0006549	146	-13.42	146	-13.42	11763	23	193	135
gga-miR-29b-3p	gga_circ_0006611	149	-16.97	149	-16.97	11789	23	291	78
gga-miR-29b-3p	gga_circ_0006816	144	-17.01	144	-17.01	11859	23	252	44
gga-miR-29b-3p	gga_circ_0000033	144	-19.09	144	-19.09	11899	23	264	144
gga-miR-29b-3p	gga_circ_0003529	140	-17.19	140	-17.19	11957	23	260	24
gga-miR-29b-3p	gga_circ_0003764	148	-14.77	148	-14.77	12025	23	252	28
gga-miR-29b-3p	gga_circ_0003765	148	-14.77	148	-14.77	12027	23	400	28
gga-miR-29b-3p	gga_circ_0003785	293	-33.94	148	-17.74	12043	23	495	463 140
gga-miR-29b-3p	gga_circ_0007911	147	-16.12	147	-16.12	12083	23	464	1
gga-miR-29b-3p	gga_circ_0007064	140	-14.91	140	-14.91	12271	23	153	125
gga-miR-29b-3p	gga_circ_0007108	143	-18.66	143	-18.66	12283	23	206	173
gga-miR-29b-3p	gga_circ_0007151	158	-22.45	158	-22.45	12299	23	224	162
gga-miR-29b-3p	gga_circ_0005138	144	-13.65	144	-13.65	12441	23	573	189
gga-miR-29b-3p	gga_circ_0005140	144	-13.65	144	-13.65	12443	23	661	277
gga-miR-29b-3p	gga_circ_0005416	155	-16.75	155	-16.75	12569	23	544	186
gga-miR-29b-3p	gga_circ_0005720	143	-14.83	143	-14.83	12705	23	291	154
gga-miR-29b-3p	gga_circ_0005846	149	-14.69	149	-14.69	12759	23	655	300
gga-miR-29b-3p	gga_circ_0005999	155	-12.83	155	-12.83	12843	23	329	149
gga-miR-29b-3p	gga_circ_0003800	150	-18.5	150	-18.5	12893	23	407	353
gga-miR-29b-3p	gga_circ_0003941	145	-14.99	145	-14.99	12947	23	344	53
gga-miR-29b-3p	gga_circ_0004042	155	-14.01	155	-14.01	13005	23	396	1
gga-miR-29b-3p	gga_circ_0004043	155	-14.01	155	-14.01	13007	23	193	1
gga-miR-29b-3p	gga_circ_0004331	142	-13.48	142	-13.48	13105	23	402	309
gga-miR-29b-3p	gga_circ_0004557	161	-19.36	161	-19.36	13203	23	537	60
gga-miR-29b-3p	gga_circ_0004736	145	-13.65	145	-13.65	13253	23	224	155
gga-miR-29b-3p	gga_circ_0004737	145	-13.65	145	-13.65	13255	23	320	155
gga-miR-29b-3p	gga_circ_0004738	145	-13.65	145	-13.65	13257	23	376	155
gga-miR-29b-3p	gga_circ_0004938	153	-17.31	153	-17.31	13349	23	288	123
gga-miR-29b-3p	gga_circ_0004990	147	-18.63	147	-18.63	13363	23	603	292
gga-miR-29b-3p	gga_circ_0001597	150	-18.88	150	-18.88	13395	23	475	443
gga-miR-29b-3p	gga_circ_0001891	148	-12.06	148	-12.06	13503	23	667	292
gga-miR-29b-3p	gga_circ_0001894	148	-12.06	148	-12.06	13505	23	482	107
gga-miR-29b-3p	gga_circ_0001953	163	-16.69	163	-16.69	13517	23	403	72
gga-miR-29b-3p	gga_circ_0002454	142	-16.14	142	-16.14	13705	23	221	157
gga-miR-29b-3p	gga_circ_0002483	143	-16.58	143	-16.58	13715	23	379	17
gga-miR-29b-3p	gga_circ_0002492	147	-13.98	147	-13.98	13725	23	423	381
gga-miR-29b-3p	gga_circ_0002509	141	-15.38	141	-15.38	13727	23	416	151
gga-miR-29b-3p	gga_circ_0002635	156	-15.37	156	-15.37	13801	23	421	182
gga-miR-29b-3p	gga_circ_0002691	157	-17.26	157	-17.26	13821	23	502	196
gga-miR-29b-3p	gga_circ_0002694	161	-24.7	161	-24.7	13823	23	770	664
gga-miR-29b-3p	gga_circ_0002699	161	-24.7	161	-24.7	13827	23	681	575
gga-miR-29b-3p	gga_circ_0002881	147	-14.81	147	-14.81	13879	23	200	167
gga-miR-29b-3p	gga_circ_0002920	158	-22.44	158	-22.44	13893	23	442	380
gga-miR-29b-3p	gga_circ_0002935	155	-17.68	155	-17.68	13899	23	293	71
gga-miR-29b-3p	gga_circ_0002957	140	-15.82	140	-15.82	13905	23	379	341
gga-miR-29b-3p	gga_circ_0002958	140	-15.82	140	-15.82	13907	23	508	341
gga-miR-29b-3p	gga_circ_0003052	142	-15.36	142	-15.36	13947	23	354	294
gga-miR-29b-3p	gga_circ_0003207	148	-20.76	148	-20.76	14017	23	262	116
gga-let-7i	gga_circ_0001298	145	-14.97	145	-14.97	14359	21	274	1
gga-let-7i	gga_circ_0001300	145	-14.97	145	-14.97	14361	21	258	212
gga-let-7i	gga_circ_0001301	145	-14.97	145	-14.97	14363	21	510	236
gga-let-7i	gga_circ_0001302	145	-14.97	145	-14.97	14365	21	590	316
gga-let-7i	gga_circ_0001326	144	-12.32	144	-12.32	14377	21	283	26
gga-let-7i	gga_circ_0001078	310	-41.99	162	-24.06	14393	21	416	171 105
gga-let-7i	gga_circ_0008892	157	-17.5	157	-17.5	14545	21	340	63
gga-let-7i	gga_circ_0009104	147	-18.23	147	-18.23	14625	21	508	445
gga-let-7i	gga_circ_0000189	141	-16.6	141	-16.6	14767	21	458	84
gga-let-7i	gga_circ_0003473	142	-14.44	142	-14.44	14975	21	259	14
gga-let-7i	gga_circ_0003497	150	-13.84	150	-13.84	14989	21	215	127
gga-let-7i	gga_circ_0007638	175	-24.76	175	-24.76	15091	21	319	120
gga-let-7i	gga_circ_0006213	142	-13.27	142	-13.27	15177	21	244	11
gga-let-7i	gga_circ_0003677	147	-18.98	147	-18.98	15447	21	277	19
gga-let-7i	gga_circ_0003782	153	-16.17	153	-16.17	15573	21	648	533
gga-let-7i	gga_circ_0007857	172	-23.43	172	-23.43	15599	21	342	160
gga-let-7i	gga_circ_0008090	145	-15.48	145	-15.48	15689	21	337	118
gga-let-7i	gga_circ_0005067	159	-19.64	159	-19.64	15943	21	711	267
gga-let-7i	gga_circ_0005084	143	-13.04	143	-13.04	15955	21	361	254
gga-let-7i	gga_circ_0005129	149	-19.32	149	-19.32	15973	21	265	177
gga-let-7i	gga_circ_0005169	153	-23.14	153	-23.14	15997	21	330	105
gga-let-7i	gga_circ_0005172	153	-23.14	153	-23.14	15999	21	575	105
gga-let-7i	gga_circ_0005175	153	-23.14	153	-23.14	16003	21	590	105
gga-let-7i	gga_circ_0005177	153	-23.14	153	-23.14	16005	21	564	292
gga-let-7i	gga_circ_0005195	142	-14.97	142	-14.97	16017	21	185	6
gga-let-7i	gga_circ_0005197	142	-14.97	142	-14.97	16019	21	282	6
gga-let-7i	gga_circ_0005204	149	-15.55	149	-15.55	16027	21	590	489
gga-let-7i	gga_circ_0005206	149	-15.55	149	-15.55	16029	21	493	392
gga-let-7i	gga_circ_0005230	142	-13.21	142	-13.21	16037	21	739	701
gga-let-7i	gga_circ_0005852	158	-15.67	158	-15.67	16301	21	333	131
gga-let-7i	gga_circ_0005853	158	-15.67	158	-15.67	16303	21	471	131
gga-let-7i	gga_circ_0005875	157	-19.41	157	-19.41	16313	21	255	63
gga-let-7i	gga_circ_0005954	152	-21.02	152	-21.02	16349	21	449	379
gga-let-7i	gga_circ_0004907	148	-13.38	148	-13.38	16867	21	334	129
gga-let-7i	gga_circ_0001755	146	-19.96	146	-19.96	16977	21	449	299
gga-let-7i	gga_circ_0002047	143	-16.25	143	-16.25	17087	21	484	124
gga-let-7i	gga_circ_0003049	144	-11.74	144	-11.74	17477	21	790	757
gga-let-7i	gga_circ_0003185	142	-15.23	142	-15.23	17545	21	645	620
gga-let-7i	gga_circ_0003186	142	-15.23	142	-15.23	17547	21	498	473
gga-miR-135a-5p	gga_circ_0000788	150	-12.03	150	-12.03	17673	23	261	4
gga-miR-135a-5p	gga_circ_0000789	150	-12.03	150	-12.03	17675	23	258	1
gga-miR-135a-5p	gga_circ_0000582	153	-15.67	153	-15.67	17777	23	319	48
gga-miR-135a-5p	gga_circ_0000203	156	-13.41	156	-13.41	17781	23	465	274
gga-miR-135a-5p	gga_circ_0001266	147	-10.04	147	-10.04	17885	23	476	260
gga-miR-135a-5p	gga_circ_0001100	140	-10.31	140	-10.31	17929	23	502	193
gga-miR-135a-5p	gga_circ_0001101	140	-10.31	140	-10.31	17931	23	377	193
gga-miR-135a-5p	gga_circ_0008796	156	-15.8	156	-15.8	18043	23	339	69
gga-miR-135a-5p	gga_circ_0008798	156	-15.8	156	-15.8	18047	23	494	224
gga-miR-135a-5p	gga_circ_0008802	156	-15.8	156	-15.8	18049	23	681	469
gga-miR-135a-5p	gga_circ_0000753	144	-10.71	144	-10.71	18251	23	267	54
gga-miR-135a-5p	gga_circ_0000189	143	-12.41	143	-12.41	18301	23	458	217
gga-miR-135a-5p	gga_circ_0008307	147	-11.67	147	-11.67	18401	23	346	89
gga-miR-135a-5p	gga_circ_0008468	146	-18.12	146	-18.12	18461	23	358	215
gga-miR-135a-5p	gga_circ_0000066	148	-12.03	148	-12.03	18487	23	303	1
gga-miR-135a-5p	gga_circ_0007706	149	-13.8	149	-13.8	18649	23	255	203
gga-miR-135a-5p	gga_circ_0006209	157	-13.45	157	-13.45	18705	23	287	210
gga-miR-135a-5p	gga_circ_0006210	157	-13.45	157	-13.45	18707	23	274	197
gga-miR-135a-5p	gga_circ_0006279	157	-15.31	157	-15.31	18745	23	542	232
gga-miR-135a-5p	gga_circ_0006424	140	-10.42	140	-10.42	18791	23	347	1
gga-miR-135a-5p	gga_circ_0006788	159	-20.33	159	-20.33	18921	23	291	118
gga-miR-135a-5p	gga_circ_0000052	145	-11.23	145	-11.23	18945	23	308	67
gga-miR-135a-5p	gga_circ_0003733	152	-14.5	152	-14.5	19005	23	305	64
gga-miR-135a-5p	gga_circ_0003549	151	-17.68	151	-17.68	19033	23	153	67
gga-miR-135a-5p	gga_circ_0003785	153	-13.91	153	-13.91	19111	23	495	127
gga-miR-135a-5p	gga_circ_0007897	160	-16.43	160	-16.43	19145	23	411	287
gga-miR-135a-5p	gga_circ_0008133	145	-11.26	145	-11.26	19233	23	250	225
gga-miR-135a-5p	gga_circ_0008136	145	-11.26	145	-11.26	19235	23	358	333
gga-miR-135a-5p	gga_circ_0007004	162	-18.88	162	-18.88	19317	23	321	27
gga-miR-135a-5p	gga_circ_0007005	162	-18.88	162	-18.88	19319	23	451	27
gga-miR-135a-5p	gga_circ_0007006	162	-18.88	162	-18.88	19321	23	525	27
gga-miR-135a-5p	gga_circ_0007104	141	-12.11	141	-12.11	19349	23	315	196
gga-miR-135a-5p	gga_circ_0007241	152	-16.53	152	-16.53	19409	23	518	347
gga-miR-135a-5p	gga_circ_0007302	152	-14.43	152	-14.43	19435	23	555	54
gga-miR-135a-5p	gga_circ_0005533	155	-17.29	155	-17.29	19685	23	282	27
gga-miR-135a-5p	gga_circ_0005535	155	-17.29	155	-17.29	19687	23	281	27
gga-miR-135a-5p	gga_circ_0005818	146	-13.59	146	-13.59	19813	23	234	133
gga-miR-135a-5p	gga_circ_0006065	149	-13.74	149	-13.74	19923	23	763	598
gga-miR-135a-5p	gga_circ_0006066	149	-13.74	149	-13.74	19925	23	621	456
gga-miR-135a-5p	gga_circ_0006067	149	-13.74	149	-13.74	19927	23	476	311
gga-miR-135a-5p	gga_circ_0006068	149	-13.74	149	-13.74	19929	23	498	333
gga-miR-135a-5p	gga_circ_0006069	149	-13.74	149	-13.74	19931	23	495	330
gga-miR-135a-5p	gga_circ_0006102	167	-16.82	167	-16.82	19945	23	394	80
gga-miR-135a-5p	gga_circ_0006103	167	-16.82	167	-16.82	19947	23	282	80
gga-miR-135a-5p	gga_circ_0003833	154	-11	154	-11	19975	23	502	218
gga-miR-135a-5p	gga_circ_0004073	143	-12.93	143	-12.93	20089	23	278	75
gga-miR-135a-5p	gga_circ_0004646	155	-14.77	155	-14.77	20303	23	267	35
gga-miR-135a-5p	gga_circ_0004745	152	-15.38	152	-15.38	20327	23	340	211
gga-miR-135a-5p	gga_circ_0001568	154	-23.81	154	-23.81	20455	23	368	278
gga-miR-135a-5p	gga_circ_0001605	149	-10.76	149	-10.76	20467	23	423	20
gga-miR-135a-5p	gga_circ_0001623	140	-12.18	140	-12.18	20473	23	1248	908
gga-miR-135a-5p	gga_circ_0001745	145	-11.12	145	-11.12	20507	23	426	380
gga-miR-135a-5p	gga_circ_0001747	145	-11.12	145	-11.12	20509	23	247	201
gga-miR-135a-5p	gga_circ_0002044	144	-15.28	144	-15.28	20619	23	529	338
gga-miR-135a-5p	gga_circ_0002152	155	-14.22	155	-14.22	20657	23	378	115
gga-miR-135a-5p	gga_circ_0002154	155	-14.22	155	-14.22	20659	23	398	135
gga-miR-135a-5p	gga_circ_0002467	158	-15.2	158	-15.2	20779	23	411	389
gga-miR-135a-5p	gga_circ_0002546	145	-15.37	145	-15.37	20827	23	243	18
gga-miR-135a-5p	gga_circ_0002549	152	-14.19	152	-14.19	20831	23	349	3
gga-miR-135a-5p	gga_circ_0002562	155	-10.24	155	-10.24	20835	23	431	317
gga-miR-135a-5p	gga_circ_0002644	159	-15.64	159	-15.64	20873	23	516	322
gga-miR-135a-5p	gga_circ_0002694	156	-16.42	156	-16.42	20891	23	770	129
gga-miR-135a-5p	gga_circ_0002957	155	-19.22	155	-19.22	20973	23	379	107
gga-miR-135a-5p	gga_circ_0002958	155	-19.22	155	-19.22	20975	23	508	107
gga-miR-135a-5p	gga_circ_0002959	155	-19.22	155	-19.22	20977	23	440	107
gga-miR-135a-5p	gga_circ_0002967	156	-15.63	156	-15.63	20979	23	338	279
gga-miR-135a-5p	gga_circ_0003274	163	-21.79	163	-21.79	21101	23	516	7
gga-miR-135a-5p	gga_circ_0000096	154	-13.2	154	-13.2	21195	23	236	30
gga-miR-135a-2-3p	gga_circ_0000269	148	-18.82	148	-18.82	21345	22	471	348
gga-miR-135a-2-3p	gga_circ_0001329	140	-12.61	140	-12.61	21447	22	563	500
gga-miR-135a-2-3p	gga_circ_0000934	157	-19.93	157	-19.93	21511	22	360	189
gga-miR-135a-2-3p	gga_circ_0000068	145	-15.27	145	-15.27	21795	22	258	71
gga-miR-135a-2-3p	gga_circ_0000047	154	-18.67	154	-18.67	21833	22	253	157
gga-miR-135a-2-3p	gga_circ_0008268	151	-16.51	151	-16.51	21927	22	508	370
gga-miR-135a-2-3p	gga_circ_0008460	147	-15.36	147	-15.36	21989	22	290	122
gga-miR-135a-2-3p	gga_circ_0008467	142	-18	142	-18	21993	22	363	28
gga-miR-135a-2-3p	gga_circ_0006185	142	-15.71	142	-15.71	22231	22	121	99
gga-miR-135a-2-3p	gga_circ_0003602	145	-15.82	145	-15.82	22581	22	633	47
gga-miR-135a-2-3p	gga_circ_0003389	148	-16.12	148	-16.12	22603	22	458	124
gga-miR-135a-2-3p	gga_circ_0007073	143	-15.81	143	-15.81	22875	22	464	59
gga-miR-135a-2-3p	gga_circ_0007262	142	-13.64	142	-13.64	22951	22	285	251
gga-miR-135a-2-3p	gga_circ_0007263	142	-13.64	142	-13.64	22953	22	167	133
gga-miR-135a-2-3p	gga_circ_0007371	156	-14.53	156	-14.53	22993	22	300	10
gga-miR-135a-2-3p	gga_circ_0005344	285	-29.24	143	-15.95	23139	22	384	1 187
gga-miR-135a-2-3p	gga_circ_0005903	145	-14.42	145	-14.42	23389	22	270	115
gga-miR-135a-2-3p	gga_circ_0005945	142	-15.2	142	-15.2	23409	22	561	272
gga-miR-135a-2-3p	gga_circ_0003850	147	-15.12	147	-15.12	23513	22	567	36
gga-miR-135a-2-3p	gga_circ_0001862	141	-16.75	141	-16.75	24097	22	844	349
gga-miR-135a-2-3p	gga_circ_0002168	145	-13.7	145	-13.7	24209	22	690	10
gga-miR-135a-2-3p	gga_circ_0002386	147	-16.69	147	-16.69	24279	22	338	72
gga-miR-135a-2-3p	gga_circ_0002615	140	-16.95	140	-16.95	24389	22	400	44
gga-miR-135a-2-3p	gga_circ_0003195	164	-20.79	164	-20.79	24617	22	286	247
gga-miR-33-5p	gga_circ_0000791	158	-14.19	158	-14.19	24745	20	267	125
gga-miR-33-5p	gga_circ_0000413	146	-12.1	146	-12.1	24935	20	216	144
gga-miR-33-5p	gga_circ_0008747	153	-20.57	153	-20.57	25097	20	362	256
gga-miR-33-5p	gga_circ_0008862	157	-14.45	157	-14.45	25133	20	321	112
gga-miR-33-5p	gga_circ_0008911	147	-14.68	147	-14.68	25153	20	396	133
gga-miR-33-5p	gga_circ_0009135	149	-12.74	149	-12.74	25239	20	522	265
gga-miR-33-5p	gga_circ_0000618	144	-16.68	144	-16.68	25275	20	302	7
gga-miR-33-5p	gga_circ_0000736	156	-14.93	156	-14.93	25313	20	345	259
gga-miR-33-5p	gga_circ_0000738	156	-14.93	156	-14.93	25315	20	341	36
gga-miR-33-5p	gga_circ_0008381	144	-12.06	144	-12.06	25495	20	566	379
gga-miR-33-5p	gga_circ_0008460	162	-15.98	162	-15.98	25523	20	290	171
gga-miR-33-5p	gga_circ_0007447	153	-12.38	153	-12.38	25631	20	217	93
gga-miR-33-5p	gga_circ_0007499	148	-14.09	148	-14.09	25651	20	685	157
gga-miR-33-5p	gga_circ_0007500	148	-14.09	148	-14.09	25653	20	393	157
gga-miR-33-5p	gga_circ_0006124	146	-12.1	146	-12.1	25749	20	303	270
gga-miR-33-5p	gga_circ_0006210	147	-11.51	147	-11.51	25775	20	274	10
gga-miR-33-5p	gga_circ_0006356	148	-11.33	148	-11.33	25833	20	188	108
gga-miR-33-5p	gga_circ_0006383	156	-15.33	156	-15.33	25845	20	228	192
gga-miR-33-5p	gga_circ_0006401	146	-11.18	146	-11.18	25849	20	482	186
gga-miR-33-5p	gga_circ_0006569	143	-13	143	-13	25903	20	468	336
gga-miR-33-5p	gga_circ_0008699	152	-21.93	152	-21.93	26015	20	357	18
gga-miR-33-5p	gga_circ_0003609	149	-12.48	149	-12.48	26077	20	308	195
gga-miR-33-5p	gga_circ_0003332	146	-10.97	146	-10.97	26119	20	361	309
gga-miR-33-5p	gga_circ_0007914	152	-17.02	152	-17.02	26221	20	109	8
gga-miR-33-5p	gga_circ_0008160	150	-16.1	150	-16.1	26309	20	528	359
gga-miR-33-5p	gga_circ_0007339	162	-17.85	162	-17.85	26513	20	454	119
gga-miR-33-5p	gga_circ_0005051	151	-11.77	151	-11.77	26533	20	339	253
gga-miR-33-5p	gga_circ_0005055	147	-10.61	147	-10.61	26535	20	445	135
gga-miR-33-5p	gga_circ_0005100	159	-18.31	159	-18.31	26563	20	317	215
gga-miR-33-5p	gga_circ_0005401	146	-13.86	146	-13.86	26687	20	360	134
gga-miR-33-5p	gga_circ_0005416	160	-16.18	160	-16.18	26705	20	544	273
gga-miR-33-5p	gga_circ_0005566	152	-10.68	152	-10.68	26771	20	308	82
gga-miR-33-5p	gga_circ_0005613	154	-13.67	154	-13.67	26795	20	351	326
gga-miR-33-5p	gga_circ_0005722	154	-14.97	154	-14.97	26843	20	116	48
gga-miR-33-5p	gga_circ_0005818	149	-14.69	149	-14.69	26881	20	234	150
gga-miR-33-5p	gga_circ_0004060	149	-15.81	149	-15.81	27151	20	505	270
gga-miR-33-5p	gga_circ_0004301	154	-15.95	154	-15.95	27231	20	177	126
gga-miR-33-5p	gga_circ_0004430	147	-10.52	147	-10.52	27277	20	393	217
gga-miR-33-5p	gga_circ_0001595	148	-11.76	148	-11.76	27529	20	296	169
gga-miR-33-5p	gga_circ_0001763	153	-15.27	153	-15.27	27585	20	545	153
gga-miR-33-5p	gga_circ_0001764	153	-15.27	153	-15.27	27587	20	498	153
gga-miR-33-5p	gga_circ_0001765	153	-15.27	153	-15.27	27589	20	453	153
gga-miR-33-5p	gga_circ_0001767	153	-15.27	153	-15.27	27591	20	393	153
gga-miR-33-5p	gga_circ_0001853	143	-11.33	143	-11.33	27625	20	306	94
gga-miR-33-5p	gga_circ_0001891	143	-10.46	143	-10.46	27639	20	667	55
gga-miR-33-5p	gga_circ_0002093	147	-11.95	147	-11.95	27701	20	447	167
gga-miR-33-5p	gga_circ_0002289	151	-17.51	151	-17.51	27783	20	327	51
gga-miR-33-5p	gga_circ_0002606	150	-11.85	150	-11.85	27919	20	399	380
gga-miR-33-5p	gga_circ_0002614	145	-12.14	145	-12.14	27921	20	553	21
gga-miR-33-5p	gga_circ_0003021	156	-12.43	156	-12.43	28069	20	426	25
gga-miR-33-5p	gga_circ_0003057	146	-10.75	146	-10.75	28085	20	319	161
gga-miR-33-5p	gga_circ_0003109	142	-11.02	142	-11.02	28113	20	557	518
gga-miR-33-5p	gga_circ_0003110	142	-11.02	142	-11.02	28115	20	825	672
gga-miR-33-5p	gga_circ_0003116	142	-11.02	142	-11.02	28117	20	453	300
gga-miR-33-5p	gga_circ_0003234	145	-11.64	145	-11.64	28157	20	491	374
gga-miR-33-5p	gga_circ_0003297	159	-16.21	159	-16.21	28179	20	763	90
gga-miR-33-5p	gga_circ_0003309	144	-13.1	144	-13.1	28185	20	519	98
gga-miR-33-5p	gga_circ_0008685	149	-18.25	149	-18.25	28255	20	489	361
gga-miR-33-3p	gga_circ_0000435	154	-15.86	154	-15.86	28329	20	232	141
gga-miR-33-3p	gga_circ_0000242	154	-13.3	154	-13.3	28399	20	546	295
gga-miR-33-3p	gga_circ_0000413	164	-24.22	164	-24.22	28469	20	216	170
gga-miR-33-3p	gga_circ_0000180	160	-19.2	160	-19.2	28623	20	279	188
gga-miR-33-3p	gga_circ_0008920	147	-12.36	147	-12.36	28691	20	329	224
gga-miR-33-3p	gga_circ_0008948	145	-15.16	145	-15.16	28705	20	586	64
gga-miR-33-3p	gga_circ_0009081	164	-20.74	164	-20.74	28755	20	387	142
gga-miR-33-3p	gga_circ_0008382	156	-18.34	156	-18.34	29031	20	349	315
gga-miR-33-3p	gga_circ_0007414	147	-12.09	147	-12.09	29151	20	260	101
gga-miR-33-3p	gga_circ_0007415	151	-16.57	151	-16.57	29153	20	194	115
gga-miR-33-3p	gga_circ_0007598	146	-13.42	146	-13.42	29213	20	429	382
gga-miR-33-3p	gga_circ_0007700	150	-15.72	150	-15.72	29249	20	189	165
gga-miR-33-3p	gga_circ_0006254	150	-15.65	150	-15.65	29339	20	455	397
gga-miR-33-3p	gga_circ_0006587	149	-12	149	-12	29443	20	540	111
gga-miR-33-3p	gga_circ_0006809	155	-18.47	155	-18.47	29527	20	390	83
gga-miR-33-3p	gga_circ_0003717	142	-12	142	-12	29603	20	282	160
gga-miR-33-3p	gga_circ_0003523	146	-13.3	146	-13.3	29623	20	467	33
gga-miR-33-3p	gga_circ_0003525	146	-13.3	146	-13.3	29625	20	490	33
gga-miR-33-3p	gga_circ_0003782	145	-12.21	145	-12.21	29709	20	648	492
gga-miR-33-3p	gga_circ_0007788	150	-17.69	150	-17.69	29717	20	347	11
gga-miR-33-3p	gga_circ_0007985	145	-13.9	145	-13.9	29781	20	475	386
gga-miR-33-3p	gga_circ_0008036	141	-10.57	141	-10.57	29803	20	500	114
gga-miR-33-3p	gga_circ_0006890	144	-12.14	144	-12.14	29869	20	569	311
gga-miR-33-3p	gga_circ_0006962	146	-16.17	146	-16.17	29899	20	270	46
gga-miR-33-3p	gga_circ_0006963	146	-16.17	146	-16.17	29901	20	452	46
gga-miR-33-3p	gga_circ_0006979	145	-12.86	145	-12.86	29909	20	554	336
gga-miR-33-3p	gga_circ_0005416	145	-12.62	145	-12.62	30239	20	544	113
gga-miR-33-3p	gga_circ_0005683	147	-14.16	147	-14.16	30355	20	223	188
gga-miR-33-3p	gga_circ_0005777	153	-12.83	153	-12.83	30399	20	261	7
gga-miR-33-3p	gga_circ_0005923	162	-18.97	162	-18.97	30467	20	435	143
gga-miR-33-3p	gga_circ_0005926	162	-18.97	162	-18.97	30469	20	465	66
gga-miR-33-3p	gga_circ_0004073	145	-10.73	145	-10.73	30691	20	278	69
gga-miR-33-3p	gga_circ_0004816	160	-21.69	160	-21.69	30961	20	309	247
gga-miR-33-3p	gga_circ_0004821	147	-11.64	147	-11.64	30965	20	323	109
gga-miR-33-3p	gga_circ_0004987	152	-11.77	152	-11.77	31031	20	269	94
gga-miR-33-3p	gga_circ_0001854	166	-18.46	166	-18.46	31161	20	277	51
gga-miR-33-3p	gga_circ_0001960	144	-13.49	144	-13.49	31191	20	457	217
gga-miR-33-3p	gga_circ_0002787	150	-12.78	150	-12.78	31521	20	317	45
gga-miR-33-3p	gga_circ_0002788	150	-12.78	150	-12.78	31523	20	299	210
gga-miR-33-3p	gga_circ_0002789	150	-12.78	150	-12.78	31525	20	283	194
gga-miR-33-3p	gga_circ_0002820	167	-23.14	167	-23.14	31535	20	599	426
gga-miR-33-3p	gga_circ_0002917	148	-14.4	148	-14.4	31561	20	621	266
gga-miR-33-3p	gga_circ_0002922	148	-14.4	148	-14.4	31565	20	369	14
gga-miR-33-3p	gga_circ_0003185	150	-13.02	150	-13.02	31681	20	645	216
gga-miR-33-3p	gga_circ_0003186	150	-13.02	150	-13.02	31683	20	498	115
gga-miR-33-3p	gga_circ_0003293	145	-15.07	145	-15.07	31711	20	563	281
gga-miR-33-3p	gga_circ_0008674	146	-11.24	146	-11.24	31781	20	292	38
gga-let-7a-5p	gga_circ_0001298	147	-15.23	147	-15.23	32029	22	274	1
gga-let-7a-5p	gga_circ_0001300	147	-15.64	147	-15.64	32031	22	258	211
gga-let-7a-5p	gga_circ_0001301	147	-15.64	147	-15.64	32033	22	510	235
gga-let-7a-5p	gga_circ_0001302	147	-15.23	147	-15.23	32035	22	590	315
gga-let-7a-5p	gga_circ_0001326	143	-10.78	143	-10.78	32047	22	283	22
gga-let-7a-5p	gga_circ_0001078	293	-32.84	150	-17.24	32063	22	416	102 170
gga-let-7a-5p	gga_circ_0008892	166	-20.82	166	-20.82	32215	22	340	63
gga-let-7a-5p	gga_circ_0009104	148	-15.12	148	-15.12	32295	22	508	448
gga-let-7a-5p	gga_circ_0000189	140	-15.39	140	-15.39	32437	22	458	85
gga-let-7a-5p	gga_circ_0003473	143	-14.5	143	-14.5	32645	22	259	13
gga-let-7a-5p	gga_circ_0003497	156	-15.27	156	-15.27	32659	22	215	126
gga-let-7a-5p	gga_circ_0007638	159	-20.73	159	-20.73	32761	22	319	120
gga-let-7a-5p	gga_circ_0006213	140	-14.2	140	-14.2	32847	22	244	10
gga-let-7a-5p	gga_circ_0003677	143	-15.2	143	-15.2	33117	22	277	19
gga-let-7a-5p	gga_circ_0003782	154	-15.71	154	-15.71	33243	22	648	532
gga-let-7a-5p	gga_circ_0007857	149	-15.5	149	-15.5	33269	22	342	159
gga-let-7a-5p	gga_circ_0008090	146	-16.94	146	-16.94	33359	22	337	121
gga-let-7a-5p	gga_circ_0005067	162	-22.28	162	-22.28	33613	22	711	265
gga-let-7a-5p	gga_circ_0005084	152	-14.64	152	-14.64	33625	22	361	253
gga-let-7a-5p	gga_circ_0005129	143	-15.4	143	-15.4	33643	22	265	176
gga-let-7a-5p	gga_circ_0005169	159	-18.7	159	-18.7	33667	22	330	99
gga-let-7a-5p	gga_circ_0005172	159	-18.7	159	-18.7	33669	22	575	99
gga-let-7a-5p	gga_circ_0005175	159	-18.7	159	-18.7	33673	22	590	99
gga-let-7a-5p	gga_circ_0005177	159	-18.7	159	-18.7	33675	22	564	286
gga-let-7a-5p	gga_circ_0005195	146	-14.63	146	-14.63	33687	22	185	4
gga-let-7a-5p	gga_circ_0005197	146	-14.63	146	-14.63	33689	22	282	4
gga-let-7a-5p	gga_circ_0005204	152	-18.68	152	-18.68	33697	22	590	489
gga-let-7a-5p	gga_circ_0005206	152	-18.68	152	-18.68	33699	22	493	392
gga-let-7a-5p	gga_circ_0005230	144	-13.74	144	-13.74	33707	22	739	700
gga-let-7a-5p	gga_circ_0005852	143	-12.7	143	-12.7	33971	22	333	134
gga-let-7a-5p	gga_circ_0005853	143	-12.7	143	-12.7	33973	22	471	134
gga-let-7a-5p	gga_circ_0005875	167	-23.68	167	-23.68	33983	22	255	63
gga-let-7a-5p	gga_circ_0005954	154	-21.28	154	-21.28	34019	22	449	375
gga-let-7a-5p	gga_circ_0004907	150	-12.88	150	-12.88	34537	22	334	128
gga-let-7a-5p	gga_circ_0001755	146	-20.17	146	-20.17	34647	22	449	301
gga-let-7a-5p	gga_circ_0002047	146	-19.57	146	-19.57	34757	22	484	122
gga-let-7a-5p	gga_circ_0003049	147	-12.44	147	-12.44	35147	22	790	755
gga-let-7a-5p	gga_circ_0003185	146	-15.63	146	-15.63	35215	22	645	619
gga-let-7a-5p	gga_circ_0003186	146	-15.63	146	-15.63	35217	22	498	472
gga-let-7a-3p	gga_circ_0000321	159	-12.09	159	-12.09	35501	22	479	134
gga-let-7a-3p	gga_circ_0000325	159	-12.09	159	-12.09	35505	22	408	134
gga-let-7a-3p	gga_circ_0001109	158	-10.28	158	-10.28	35607	22	425	205
gga-let-7a-3p	gga_circ_0001110	158	-10.28	158	-10.28	35609	22	743	395
gga-let-7a-3p	gga_circ_0001116	158	-10.28	158	-10.28	35615	22	364	254
gga-let-7a-3p	gga_circ_0005082	166	-15.21	166	-15.21	37157	22	354	310
gga-let-7a-3p	gga_circ_0004631	154	-13	154	-13	37969	22	257	113
gga-let-7a-3p	gga_circ_0004650	160	-19.65	160	-19.65	37975	22	375	71
gga-let-7b	gga_circ_0001298	149	-19.51	149	-19.51	39097	22	274	1
gga-let-7b	gga_circ_0001300	149	-19.51	149	-19.51	39099	22	258	211
gga-let-7b	gga_circ_0001301	149	-19.51	149	-19.51	39101	22	510	235
gga-let-7b	gga_circ_0001302	149	-19.51	149	-19.51	39103	22	590	315
gga-let-7b	gga_circ_0001326	147	-17.34	147	-17.34	39115	22	283	21
gga-let-7b	gga_circ_0001078	299	-35.23	150	-17.72	39131	22	416	102 170
gga-let-7b	gga_circ_0008892	164	-20.89	164	-20.89	39283	22	340	62
gga-let-7b	gga_circ_0009104	148	-15.77	148	-15.77	39363	22	508	448
gga-let-7b	gga_circ_0000189	140	-15.9	140	-15.9	39505	22	458	85
gga-let-7b	gga_circ_0003473	143	-15.28	143	-15.28	39713	22	259	13
gga-let-7b	gga_circ_0003497	160	-20.25	160	-20.25	39727	22	215	126
gga-let-7b	gga_circ_0007638	158	-21.1	158	-21.1	39829	22	319	119
gga-let-7b	gga_circ_0006213	140	-12.7	140	-12.7	39915	22	244	10
gga-let-7b	gga_circ_0003677	141	-19.29	141	-19.29	40185	22	277	18
gga-let-7b	gga_circ_0003782	149	-17.43	149	-17.43	40311	22	648	534
gga-let-7b	gga_circ_0007857	155	-19.67	155	-19.67	40337	22	342	159
gga-let-7b	gga_circ_0008090	143	-14.41	143	-14.41	40427	22	337	118
gga-let-7b	gga_circ_0005067	161	-23.21	161	-23.21	40681	22	711	266
gga-let-7b	gga_circ_0005084	145	-14.85	145	-14.85	40693	22	361	253
gga-let-7b	gga_circ_0005129	149	-18.12	149	-18.12	40711	22	265	178
gga-let-7b	gga_circ_0005169	163	-25.66	163	-25.66	40735	22	330	99
gga-let-7b	gga_circ_0005172	163	-25.66	163	-25.66	40737	22	575	99
gga-let-7b	gga_circ_0005175	163	-25.66	163	-25.66	40741	22	590	99
gga-let-7b	gga_circ_0005177	163	-25.66	163	-25.66	40743	22	564	286
gga-let-7b	gga_circ_0005195	142	-15.43	142	-15.43	40755	22	185	5
gga-let-7b	gga_circ_0005197	142	-15.43	142	-15.43	40757	22	282	5
gga-let-7b	gga_circ_0005204	148	-18.95	148	-18.95	40765	22	590	489
gga-let-7b	gga_circ_0005206	148	-18.95	148	-18.95	40767	22	493	392
gga-let-7b	gga_circ_0005230	141	-11.7	141	-11.7	40775	22	739	699
gga-let-7b	gga_circ_0005852	149	-20.36	149	-20.36	41039	22	333	132
gga-let-7b	gga_circ_0005853	149	-20.36	149	-20.36	41041	22	471	132
gga-let-7b	gga_circ_0005875	163	-19.87	163	-19.87	41051	22	255	63
gga-let-7b	gga_circ_0005954	150	-22.13	150	-22.13	41087	22	449	375
gga-let-7b	gga_circ_0004907	144	-15	144	-15	41605	22	334	127
gga-let-7b	gga_circ_0001755	143	-17.71	143	-17.71	41715	22	449	300
gga-let-7b	gga_circ_0002047	144	-16.75	144	-16.75	41825	22	484	123
gga-let-7b	gga_circ_0003049	140	-12.72	140	-12.72	42215	22	790	755
gga-let-7b	gga_circ_0003185	148	-18.35	148	-18.35	42283	22	645	619
gga-let-7b	gga_circ_0003186	148	-18.35	148	-18.35	42285	22	498	472
gga-miR-99a-5p	gga_circ_0008369	147	-16.7	147	-16.7	43163	22	371	273
gga-miR-99a-5p	gga_circ_0005173	147	-15.4	147	-15.4	44273	22	406	127
gga-miR-99a-5p	gga_circ_0005177	147	-15.4	147	-15.4	44277	22	564	127
gga-miR-99a-5p	gga_circ_0004510	154	-15.46	154	-15.46	44977	22	793	302
gga-miR-99a-5p	gga_circ_0004775	153	-18.61	153	-18.61	45073	22	515	51
gga-miR-99a-5p	gga_circ_0003171	148	-16.25	148	-16.25	45807	22	313	46
gga-miR-99a-3p	gga_circ_0007680	150	-14.6	150	-14.6	46905	21	424	46
gga-miR-99a-3p	gga_circ_0003785	147	-12.9	147	-12.9	47383	21	495	264
gga-miR-99a-3p	gga_circ_0007304	163	-19.32	163	-19.32	47709	21	499	164
gga-miR-99a-3p	gga_circ_0005169	150	-18.46	150	-18.46	47803	21	330	32
gga-miR-99a-3p	gga_circ_0005172	150	-18.46	150	-18.46	47805	21	575	32
gga-miR-99a-3p	gga_circ_0005175	150	-18.46	150	-18.46	47809	21	590	32
gga-miR-99a-3p	gga_circ_0005177	150	-18.46	150	-18.46	47811	21	564	219
gga-miR-99a-3p	gga_circ_0005492	153	-14.72	153	-14.72	47929	21	426	304
gga-miR-99a-3p	gga_circ_0005496	153	-14.72	153	-14.72	47931	21	318	196
gga-miR-99a-3p	gga_circ_0006096	143	-11.82	143	-11.82	48213	21	321	93
gga-miR-99a-3p	gga_circ_0003914	152	-14.22	152	-14.22	48275	21	335	80
gga-miR-99a-3p	gga_circ_0002152	160	-15.73	160	-15.73	48929	21	378	271
gga-miR-99a-3p	gga_circ_0002154	160	-15.73	160	-15.73	48931	21	398	291
gga-miR-99a-3p	gga_circ_0008666	155	-19.34	155	-19.34	49443	21	304	70
gga-miR-99a-3p	gga_circ_0008667	155	-19.34	155	-19.34	49445	21	317	70
gga-let-7c-5p	gga_circ_0001298	147	-17.76	147	-17.76	49699	22	274	1
gga-let-7c-5p	gga_circ_0001300	147	-17.76	147	-17.76	49701	22	258	211
gga-let-7c-5p	gga_circ_0001301	147	-17.76	147	-17.76	49703	22	510	235
gga-let-7c-5p	gga_circ_0001302	147	-17.76	147	-17.76	49705	22	590	315
gga-let-7c-5p	gga_circ_0001326	147	-16.28	147	-16.28	49717	22	283	21
gga-let-7c-5p	gga_circ_0001078	297	-36.28	150	-19.04	49733	22	416	102 167
gga-let-7c-5p	gga_circ_0008892	168	-20.61	168	-20.61	49885	22	340	62
gga-let-7c-5p	gga_circ_0009104	148	-15.76	148	-15.76	49965	22	508	448
gga-let-7c-5p	gga_circ_0000189	140	-15.12	140	-15.12	50107	22	458	85
gga-let-7c-5p	gga_circ_0003473	143	-14.87	143	-14.87	50315	22	259	13
gga-let-7c-5p	gga_circ_0003497	164	-22.06	164	-22.06	50329	22	215	126
gga-let-7c-5p	gga_circ_0007638	159	-20.04	159	-20.04	50431	22	319	120
gga-let-7c-5p	gga_circ_0006213	140	-12.78	140	-12.78	50517	22	244	10
gga-let-7c-5p	gga_circ_0003677	141	-17.92	141	-17.92	50787	22	277	17
gga-let-7c-5p	gga_circ_0003782	150	-14.8	150	-14.8	50913	22	648	532
gga-let-7c-5p	gga_circ_0007857	149	-15.5	149	-15.5	50939	22	342	159
gga-let-7c-5p	gga_circ_0008090	144	-14.38	144	-14.38	51029	22	337	119
gga-let-7c-5p	gga_circ_0005067	161	-23.21	161	-23.21	51283	22	711	266
gga-let-7c-5p	gga_circ_0005084	149	-15.92	149	-15.92	51295	22	361	253
gga-let-7c-5p	gga_circ_0005129	149	-16.33	149	-16.33	51313	22	265	178
gga-let-7c-5p	gga_circ_0005169	167	-25.69	167	-25.69	51337	22	330	99
gga-let-7c-5p	gga_circ_0005172	167	-25.69	167	-25.69	51339	22	575	99
gga-let-7c-5p	gga_circ_0005175	167	-25.69	167	-25.69	51343	22	590	99
gga-let-7c-5p	gga_circ_0005177	167	-25.69	167	-25.69	51345	22	564	286
gga-let-7c-5p	gga_circ_0005195	144	-18.68	144	-18.68	51357	22	185	4
gga-let-7c-5p	gga_circ_0005197	144	-18.68	144	-18.68	51359	22	282	4
gga-let-7c-5p	gga_circ_0005204	152	-20.1	152	-20.1	51367	22	590	489
gga-let-7c-5p	gga_circ_0005206	152	-20.1	152	-20.1	51369	22	493	392
gga-let-7c-5p	gga_circ_0005230	141	-13.64	141	-13.64	51377	22	739	700
gga-let-7c-5p	gga_circ_0005852	151	-19.19	151	-19.19	51641	22	333	134
gga-let-7c-5p	gga_circ_0005853	151	-19.19	151	-19.19	51643	22	471	134
gga-let-7c-5p	gga_circ_0005875	163	-20.21	163	-20.21	51653	22	255	63
gga-let-7c-5p	gga_circ_0005954	152	-19.88	152	-19.88	51689	22	449	376
gga-let-7c-5p	gga_circ_0004907	146	-14.37	146	-14.37	52207	22	334	128
gga-let-7c-5p	gga_circ_0001755	147	-20.55	147	-20.55	52317	22	449	300
gga-let-7c-5p	gga_circ_0002047	144	-16.73	144	-16.73	52427	22	484	123
gga-let-7c-5p	gga_circ_0003049	143	-12.75	143	-12.75	52817	22	790	755
gga-let-7c-5p	gga_circ_0003185	152	-19.56	152	-19.56	52885	22	645	619
gga-let-7c-5p	gga_circ_0003186	152	-19.56	152	-19.56	52887	22	498	472
gga-let-7c-3p	gga_circ_0000916	152	-16.45	152	-16.45	53063	22	415	91
gga-let-7c-3p	gga_circ_0000525	145	-13.45	145	-13.45	53101	22	593	1
gga-let-7c-3p	gga_circ_0000918	142	-15.91	142	-15.91	53311	22	305	274
gga-let-7c-3p	gga_circ_0008891	156	-16.38	156	-16.38	53417	22	637	466
gga-let-7c-3p	gga_circ_0009081	142	-14.54	142	-14.54	53493	22	387	290
gga-let-7c-3p	gga_circ_0009104	151	-14.75	151	-14.75	53499	22	508	363
gga-let-7c-3p	gga_circ_0009164	154	-15.75	154	-15.75	53517	22	375	120
gga-let-7c-3p	gga_circ_0009168	154	-15.75	154	-15.75	53523	22	296	120
gga-let-7c-3p	gga_circ_0009169	154	-15.75	154	-15.75	53525	22	329	120
gga-let-7c-3p	gga_circ_0001406	147	-15.64	147	-15.64	53635	22	1213	1031
gga-let-7c-3p	gga_circ_0001539	156	-12.06	156	-12.06	53681	22	507	392
gga-let-7c-3p	gga_circ_0001541	156	-12.06	156	-12.06	53683	22	413	392
gga-let-7c-3p	gga_circ_0000108	151	-15.42	151	-15.42	53685	22	473	98
gga-let-7c-3p	gga_circ_0006732	297	-33.86	153	-21	54235	22	507	55 363
gga-let-7c-3p	gga_circ_0006733	153	-21	153	-21	54237	22	370	55
gga-let-7c-3p	gga_circ_0008699	146	-11.56	146	-11.56	54287	22	357	239
gga-let-7c-3p	gga_circ_0003419	140	-10.04	140	-10.04	54417	22	299	1
gga-let-7c-3p	gga_circ_0007920	140	-13.13	140	-13.13	54497	22	305	3
gga-let-7c-3p	gga_circ_0008090	145	-11.48	145	-11.48	54563	22	337	103
gga-let-7c-3p	gga_circ_0005606	152	-10.04	152	-10.04	55063	22	270	232
gga-let-7c-3p	gga_circ_0005625	140	-16.06	140	-16.06	55073	22	260	80
gga-let-7c-3p	gga_circ_0005838	156	-13.43	156	-13.43	55163	22	334	65
gga-let-7c-3p	gga_circ_0005846	149	-13.88	149	-13.88	55167	22	655	276
gga-let-7c-3p	gga_circ_0005847	149	-13.88	149	-13.88	55169	22	450	273
gga-let-7c-3p	gga_circ_0005848	149	-13.88	149	-13.88	55171	22	329	77
gga-let-7c-3p	gga_circ_0003833	155	-15.34	155	-15.34	55315	22	502	369
gga-let-7c-3p	gga_circ_0003980	152	-15.5	152	-15.5	55375	22	440	418
gga-let-7c-3p	gga_circ_0004515	150	-14.32	150	-14.32	55583	22	325	47
gga-let-7c-3p	gga_circ_0004516	150	-14.32	150	-14.32	55585	22	378	47
gga-let-7c-3p	gga_circ_0004529	157	-10.08	157	-10.08	55589	22	293	75
gga-let-7c-3p	gga_circ_0004990	160	-11.63	160	-11.63	55771	22	603	82
gga-let-7c-3p	gga_circ_0001953	160	-17.15	160	-17.15	55925	22	403	240
gga-let-7c-3p	gga_circ_0001955	160	-17.15	160	-17.15	55927	22	314	151
gga-let-7c-3p	gga_circ_0002133	140	-10.15	140	-10.15	55993	22	528	124
gga-let-7c-3p	gga_circ_0002242	152	-14.2	152	-14.2	56035	22	604	408
gga-let-7c-3p	gga_circ_0002397	143	-18.7	143	-18.7	56091	22	351	82
gga-let-7c-3p	gga_circ_0003155	148	-13.45	148	-13.45	56403	22	216	61
gga-let-7c-3p	gga_circ_0008534	140	-10.85	140	-10.85	56471	22	275	20
gga-let-7c-3p	gga_circ_0008649	156	-12.86	156	-12.86	56505	22	340	77
gga-miR-125b-5p	gga_circ_0000322	149	-20.37	149	-20.37	56707	22	251	140
gga-miR-125b-5p	gga_circ_0001329	149	-17.15	149	-17.15	56787	22	563	233
gga-miR-125b-5p	gga_circ_0008802	159	-22.79	159	-22.79	56923	22	681	217
gga-miR-125b-5p	gga_circ_0008828	285	-34.06	145	-17.19	56931	22	490	449 121
gga-miR-125b-5p	gga_circ_0008891	168	-22.73	168	-22.73	56951	22	637	424
gga-miR-125b-5p	gga_circ_0008982	140	-14.02	140	-14.02	56989	22	81	48
gga-miR-125b-5p	gga_circ_0000604	147	-15.91	147	-15.91	57071	22	401	340
gga-miR-125b-5p	gga_circ_0000617	146	-23.01	146	-23.01	57079	22	242	200
gga-miR-125b-5p	gga_circ_0000771	140	-17.57	140	-17.57	57129	22	315	156
gga-miR-125b-5p	gga_circ_0000132	142	-15.6	142	-15.6	57145	22	405	361
gga-miR-125b-5p	gga_circ_0008332	140	-14.33	140	-14.33	57287	22	352	179
gga-miR-125b-5p	gga_circ_0008468	150	-21.16	150	-21.16	57335	22	358	250
gga-miR-125b-5p	gga_circ_0003440	142	-18.57	142	-18.57	57371	22	308	184
gga-miR-125b-5p	gga_circ_0007374	149	-17.8	149	-17.8	57409	22	185	146
gga-miR-125b-5p	gga_circ_0007429	147	-18.21	147	-18.21	57433	22	401	285
gga-miR-125b-5p	gga_circ_0007616	141	-17.53	141	-17.53	57491	22	319	158
gga-miR-125b-5p	gga_circ_0006139	151	-22.91	151	-22.91	57563	22	210	75
gga-miR-125b-5p	gga_circ_0006210	142	-15.85	142	-15.85	57581	22	274	140
gga-miR-125b-5p	gga_circ_0006684	154	-19.75	154	-19.75	57759	22	316	166
gga-miR-125b-5p	gga_circ_0003781	149	-17.88	149	-17.88	57979	22	405	168
gga-miR-125b-5p	gga_circ_0008087	140	-16.45	140	-16.45	58095	22	316	245
gga-miR-125b-5p	gga_circ_0008090	141	-16.45	141	-16.45	58097	22	337	42
gga-miR-125b-5p	gga_circ_0007031	142	-16.45	142	-16.45	58201	22	394	147
gga-miR-125b-5p	gga_circ_0007170	140	-15.29	140	-15.29	58245	22	520	328
gga-miR-125b-5p	gga_circ_0005502	151	-17.24	151	-17.24	58539	22	352	63
gga-miR-125b-5p	gga_circ_0005508	151	-17.24	151	-17.24	58541	22	309	263
gga-miR-125b-5p	gga_circ_0005509	151	-17.24	151	-17.24	58543	22	386	340
gga-miR-125b-5p	gga_circ_0005510	151	-17.24	151	-17.24	58545	22	389	343
gga-miR-125b-5p	gga_circ_0005511	151	-17.24	151	-17.24	58547	22	563	517
gga-miR-125b-5p	gga_circ_0005606	141	-16.21	141	-16.21	58597	22	270	71
gga-miR-125b-5p	gga_circ_0005888	171	-28.1	171	-28.1	58723	22	485	262
gga-miR-125b-5p	gga_circ_0004241	148	-21.12	148	-21.12	59017	22	287	95
gga-miR-125b-5p	gga_circ_0004242	148	-21.12	148	-21.12	59019	22	435	95
gga-miR-125b-5p	gga_circ_0004616	141	-14.33	141	-14.33	59167	22	455	416
gga-miR-125b-5p	gga_circ_0004802	163	-24.51	163	-24.51	59225	22	454	424
gga-miR-125b-5p	gga_circ_0001819	160	-23.55	160	-23.55	59413	22	506	198
gga-miR-125b-5p	gga_circ_0001821	160	-23.55	160	-23.55	59415	22	409	101
gga-miR-125b-5p	gga_circ_0001862	153	-20.55	153	-20.55	59437	22	844	311
gga-miR-125b-5p	gga_circ_0002440	140	-15.46	140	-15.46	59643	22	386	176
gga-miR-125b-5p	gga_circ_0002441	140	-15.46	140	-15.46	59645	22	428	205
gga-miR-125b-5p	gga_circ_0002792	144	-14.33	144	-14.33	59799	22	387	11
gga-miR-125b-5p	gga_circ_0002826	161	-28.62	161	-28.62	59811	22	300	98
gga-miR-125b-5p	gga_circ_0003052	146	-19.87	146	-19.87	59889	22	354	272
gga-miR-125b-3p	gga_circ_0000475	143	-15.87	143	-15.87	60147	22	145	104
gga-miR-125b-3p	gga_circ_0000269	157	-20.79	157	-20.79	60219	22	471	326
gga-miR-125b-3p	gga_circ_0000362	145	-11.63	145	-11.63	60263	22	340	302
gga-miR-125b-3p	gga_circ_0000388	151	-18.78	151	-18.78	60273	22	171	5
gga-miR-125b-3p	gga_circ_0000414	142	-16.32	142	-16.32	60277	22	52	1
gga-miR-125b-3p	gga_circ_0001077	157	-16.65	157	-16.65	60333	22	324	300
gga-miR-125b-3p	gga_circ_0001110	143	-10.28	143	-10.28	60347	22	743	643
gga-miR-125b-3p	gga_circ_0000932	147	-17.47	147	-17.47	60383	22	713	3
gga-miR-125b-3p	gga_circ_0001044	164	-23.96	164	-23.96	60423	22	477	426
gga-miR-125b-3p	gga_circ_0008938	299	-32.92	153	-17.94	60507	22	294	15 45
gga-miR-125b-3p	gga_circ_0009175	140	-12.15	140	-12.15	60595	22	390	114
gga-miR-125b-3p	gga_circ_0003476	149	-17.63	149	-17.63	60919	22	326	66
gga-miR-125b-3p	gga_circ_0007449	151	-14.57	151	-14.57	60973	22	450	214
gga-miR-125b-3p	gga_circ_0007452	151	-14.57	151	-14.57	60977	22	480	214
gga-miR-125b-3p	gga_circ_0007512	159	-18.46	159	-18.46	60999	22	580	409
gga-miR-125b-3p	gga_circ_0007730	145	-20.92	145	-20.92	61067	22	374	45
gga-miR-125b-3p	gga_circ_0006357	154	-20.32	154	-20.32	61175	22	149	59
gga-miR-125b-3p	gga_circ_0006416	142	-14.86	142	-14.86	61193	22	373	85
gga-miR-125b-3p	gga_circ_0008699	146	-19.45	146	-19.45	61355	22	357	83
gga-miR-125b-3p	gga_circ_0003785	153	-16.16	153	-16.16	61519	22	495	295
gga-miR-125b-3p	gga_circ_0007976	148	-18.88	148	-18.88	61585	22	544	419
gga-miR-125b-3p	gga_circ_0008110	155	-17.97	155	-17.97	61637	22	169	19
gga-miR-125b-3p	gga_circ_0008160	140	-15.44	140	-15.44	61649	22	528	448
gga-miR-125b-3p	gga_circ_0006890	162	-24	162	-24	61675	22	569	20
gga-miR-125b-3p	gga_circ_0007060	149	-18.18	149	-18.18	61743	22	402	139
gga-miR-125b-3p	gga_circ_0007233	149	-17.89	149	-17.89	61811	22	539	46
gga-miR-125b-3p	gga_circ_0005254	143	-12.41	143	-12.41	61987	22	353	272
gga-miR-125b-3p	gga_circ_0005405	143	-14.47	143	-14.47	62033	22	347	312
gga-miR-125b-3p	gga_circ_0005613	154	-26.09	154	-26.09	62135	22	351	129
gga-miR-125b-3p	gga_circ_0005683	155	-19.19	155	-19.19	62161	22	223	10
gga-miR-125b-3p	gga_circ_0005860	157	-17.33	157	-17.33	62253	22	252	88
gga-miR-125b-3p	gga_circ_0003911	156	-19.38	156	-19.38	62409	22	287	183
gga-miR-125b-3p	gga_circ_0004034	150	-17.36	150	-17.36	62477	22	432	324
gga-miR-125b-3p	gga_circ_0004319	142	-15.45	142	-15.45	62577	22	407	327
gga-miR-125b-3p	gga_circ_0004510	150	-14.72	150	-14.72	62647	22	793	236
gga-miR-125b-3p	gga_circ_0004669	152	-14.82	152	-14.82	62715	22	449	42
gga-miR-125b-3p	gga_circ_0004788	140	-10.93	140	-10.93	62751	22	313	228
gga-miR-125b-3p	gga_circ_0002298	156	-16.18	156	-16.18	63125	22	348	256
gga-miR-125b-3p	gga_circ_0002637	147	-14.17	147	-14.17	63279	22	234	195
gga-miR-125b-3p	gga_circ_0002820	155	-19.81	155	-19.81	63341	22	599	73
gga-miR-125b-3p	gga_circ_0002895	144	-13.11	144	-13.11	63361	22	623	145
gga-miR-125b-3p	gga_circ_0002897	144	-13.11	144	-13.11	63363	22	643	145
gga-miR-125b-3p	gga_circ_0003009	150	-16.71	150	-16.71	63405	22	444	386
gga-miR-125b-3p	gga_circ_0003015	153	-14.68	153	-14.68	63407	22	295	132
gga-miR-125b-3p	gga_circ_0003029	146	-14.87	146	-14.87	63413	22	444	74
gga-miR-125b-3p	gga_circ_0003031	145	-14.87	145	-14.87	63415	22	368	1
gga-miR-125b-3p	gga_circ_0003155	150	-14.22	150	-14.22	63471	22	216	135
gga-miR-155	gga_circ_0000528	155	-11.75	155	-11.75	63705	22	515	358
gga-miR-155	gga_circ_0000203	151	-12.72	151	-12.72	63723	22	465	253
gga-miR-155	gga_circ_0009185	148	-14.97	148	-14.97	64133	22	461	227
gga-miR-155	gga_circ_0000023	154	-13.09	154	-13.09	64299	22	277	124
gga-miR-155	gga_circ_0008202	147	-12.81	147	-12.81	64315	22	555	428
gga-miR-155	gga_circ_0008718	152	-12.93	152	-12.93	64895	22	445	385
gga-miR-155	gga_circ_0008719	152	-12.93	152	-12.93	64897	22	366	306
gga-miR-155	gga_circ_0008720	152	-12.93	152	-12.93	64899	22	245	185
gga-miR-155	gga_circ_0008017	142	-10.43	142	-10.43	65131	22	557	311
gga-miR-155	gga_circ_0008176	154	-17.49	154	-17.49	65191	22	272	184
gga-miR-155	gga_circ_0007170	141	-11.53	141	-11.53	65313	22	520	29
gga-miR-155	gga_circ_0005712	145	-12.85	145	-12.85	65707	22	348	322
gga-miR-155	gga_circ_0005784	148	-12.04	148	-12.04	65743	22	302	186
gga-miR-155	gga_circ_0006089	146	-14.04	146	-14.04	65879	22	356	168
gga-miR-155	gga_circ_0006120	141	-11.58	141	-11.58	65895	22	320	16
gga-miR-155	gga_circ_0003916	150	-10.95	150	-10.95	65947	22	564	429
gga-miR-155	gga_circ_0003942	156	-15.21	156	-15.21	65959	22	446	302
gga-miR-155	gga_circ_0003956	145	-10.84	145	-10.84	65963	22	373	312
gga-miR-155	gga_circ_0004092	148	-11.27	148	-11.27	66041	22	303	149
gga-miR-155	gga_circ_0004093	148	-11.27	148	-11.27	66043	22	358	149
gga-miR-155	gga_circ_0004171	140	-13.43	140	-13.43	66063	22	315	178
gga-miR-155	gga_circ_0004172	140	-13.43	140	-13.43	66065	22	227	178
gga-miR-155	gga_circ_0004465	140	-12.68	140	-12.68	66167	22	281	206
gga-miR-155	gga_circ_0004609	157	-13.89	157	-13.89	66229	22	311	231
gga-miR-155	gga_circ_0004612	157	-13.89	157	-13.89	66233	22	482	402
gga-miR-155	gga_circ_0004669	145	-11.4	145	-11.4	66249	22	449	237
gga-miR-155	gga_circ_0001999	151	-11.39	151	-11.39	66551	22	360	108
gga-miR-155	gga_circ_0002470	146	-14.88	146	-14.88	66723	22	345	197
gga-miR-155	gga_circ_0002562	306	-22.43	163	-11.72	66777	22	431	42 97
gga-miR-155	gga_circ_0002881	159	-18.05	159	-18.05	66889	22	200	48
gga-miR-155	gga_circ_0002895	148	-10.94	148	-10.94	66895	22	623	250
gga-miR-155	gga_circ_0002897	148	-10.94	148	-10.94	66897	22	643	250
gga-miR-155	gga_circ_0003110	157	-14.87	157	-14.87	66989	22	825	713
gga-miR-155	gga_circ_0003116	157	-14.87	157	-14.87	66991	22	453	341
gga-miR-155	gga_circ_0003297	146	-13.23	146	-13.23	67053	22	763	64
gga-miR-222a	gga_circ_0001333	164	-20.99	164	-20.99	67391	24	306	187
gga-miR-222a	gga_circ_0008891	158	-24.28	158	-24.28	67553	24	637	538
gga-miR-222a	gga_circ_0009005	169	-22.49	169	-22.49	67597	24	184	121
gga-miR-222a	gga_circ_0006233	163	-17.8	163	-17.8	68201	24	362	303
gga-miR-222a	gga_circ_0006248	150	-20.51	150	-20.51	68209	24	342	286
gga-miR-222a	gga_circ_0006376	149	-13.28	149	-13.28	68245	24	415	291
gga-miR-222a	gga_circ_0006483	151	-18.67	151	-18.67	68289	24	261	134
gga-miR-222a	gga_circ_0006732	152	-18.6	152	-18.6	68371	24	507	83
gga-miR-222a	gga_circ_0006733	152	-18.6	152	-18.6	68373	24	370	83
gga-miR-222a	gga_circ_0008699	152	-17.57	152	-17.57	68423	24	357	49
gga-miR-222a	gga_circ_0008017	150	-17.49	150	-17.49	68665	24	557	533
gga-miR-222a	gga_circ_0008160	152	-19.17	152	-19.17	68717	24	528	467
gga-miR-222a	gga_circ_0007274	150	-15.92	150	-15.92	68901	24	547	178
gga-miR-222a	gga_circ_0007334	167	-24.15	167	-24.15	68917	24	475	231
gga-miR-222a	gga_circ_0005185	143	-17.08	143	-17.08	69021	24	315	211
gga-miR-222a	gga_circ_0005191	143	-17.08	143	-17.08	69023	24	364	50
gga-miR-222a	gga_circ_0005405	167	-25.1	167	-25.1	69101	24	347	211
gga-miR-222a	gga_circ_0005851	144	-10.74	144	-10.74	69309	24	448	42
gga-miR-222a	gga_circ_0003797	150	-16.97	150	-16.97	69435	24	474	172
gga-miR-222a	gga_circ_0004430	164	-26.94	164	-26.94	69685	24	393	166
gga-miR-222a	gga_circ_0004703	153	-21.8	153	-21.8	69789	24	247	9
gga-miR-222a	gga_circ_0004705	153	-21.8	153	-21.8	69791	24	178	9
gga-miR-222a	gga_circ_0001657	150	-16.38	150	-16.38	69963	24	219	56
gga-miR-222a	gga_circ_0001659	150	-16.38	150	-16.38	69965	24	370	56
gga-miR-222a	gga_circ_0002013	157	-20.42	157	-20.42	70089	24	182	118
gga-miR-222a	gga_circ_0002385	149	-15.37	149	-15.37	70219	24	702	152
gga-miR-222a	gga_circ_0003195	154	-13.37	154	-13.37	70559	24	286	23
gga-miR-222a	gga_circ_0008603	146	-15.08	146	-15.08	70623	24	492	461
gga-miR-222a	gga_circ_0008640	153	-17.98	153	-17.98	70639	24	403	59
gga-miR-222a	gga_circ_0000096	154	-11.7	154	-11.7	70671	24	236	214
gga-miR-221-5p	gga_circ_0000198	150	-15.55	150	-15.55	70789	27	423	106
gga-miR-221-5p	gga_circ_0000294	149	-17.48	149	-17.48	70829	27	515	318
gga-miR-221-5p	gga_circ_0001167	155	-20.07	155	-20.07	70969	27	239	189
gga-miR-221-5p	gga_circ_0008779	147	-19.96	147	-19.96	71045	27	461	160
gga-miR-221-5p	gga_circ_0001348	151	-21.84	151	-21.84	71291	27	266	146
gga-miR-221-5p	gga_circ_0001406	142	-17.41	142	-17.41	71305	27	1213	771
gga-miR-221-5p	gga_circ_0008289	140	-17.72	140	-17.72	71405	27	350	217
gga-miR-221-5p	gga_circ_0008320	142	-15.98	142	-15.98	71417	27	319	114
gga-miR-221-5p	gga_circ_0006569	142	-20.32	142	-20.32	71845	27	468	305
gga-miR-221-5p	gga_circ_0000050	151	-18.52	151	-18.52	71953	27	488	325
gga-miR-221-5p	gga_circ_0000052	151	-18.52	151	-18.52	71955	27	308	145
gga-miR-221-5p	gga_circ_0007918	149	-17.79	149	-17.79	72165	27	346	1
gga-miR-221-5p	gga_circ_0006962	151	-18.63	151	-18.63	72307	27	270	62
gga-miR-221-5p	gga_circ_0006963	151	-18.63	151	-18.63	72309	27	452	62
gga-miR-221-5p	gga_circ_0007013	150	-22.99	150	-22.99	72333	27	399	75
gga-miR-221-5p	gga_circ_0007196	153	-19.06	153	-19.06	72389	27	183	106
gga-miR-221-5p	gga_circ_0007197	153	-19.06	153	-19.06	72391	27	183	106
gga-miR-221-5p	gga_circ_0007285	159	-21.4	159	-21.4	72437	27	341	146
gga-miR-221-5p	gga_circ_0007304	153	-15.47	153	-15.47	72447	27	499	216
gga-miR-221-5p	gga_circ_0005920	147	-16.31	147	-16.31	72873	27	294	121
gga-miR-221-5p	gga_circ_0006016	150	-18.73	150	-18.73	72929	27	263	89
gga-miR-221-5p	gga_circ_0003870	162	-19.55	162	-19.55	72995	27	325	208
gga-miR-221-5p	gga_circ_0003980	151	-21.32	151	-21.32	73045	27	440	31
gga-miR-221-5p	gga_circ_0002273	148	-19.77	148	-19.77	73717	27	508	345
gga-miR-221-5p	gga_circ_0003029	151	-25.86	151	-25.86	74015	27	444	373
gga-miR-221-5p	gga_circ_0003031	151	-25.86	151	-25.86	74017	27	368	297
gga-miR-221-5p	gga_circ_0008685	145	-16.54	145	-16.54	74197	27	489	258
gga-miR-221-3p	gga_circ_0001333	159	-21.76	159	-21.76	74459	23	306	187
gga-miR-221-3p	gga_circ_0008891	157	-21.24	157	-21.24	74621	23	637	541
gga-miR-221-3p	gga_circ_0009005	159	-24.49	159	-24.49	74665	23	184	117
gga-miR-221-3p	gga_circ_0006233	152	-13.51	152	-13.51	75269	23	362	303
gga-miR-221-3p	gga_circ_0006248	156	-17.19	156	-17.19	75277	23	342	290
gga-miR-221-3p	gga_circ_0006376	149	-16.02	149	-16.02	75313	23	415	294
gga-miR-221-3p	gga_circ_0006483	155	-14.47	155	-14.47	75357	23	261	137
gga-miR-221-3p	gga_circ_0006732	149	-13.63	149	-13.63	75439	23	507	87
gga-miR-221-3p	gga_circ_0006733	149	-13.63	149	-13.63	75441	23	370	87
gga-miR-221-3p	gga_circ_0008699	151	-20.17	151	-20.17	75491	23	357	50
gga-miR-221-3p	gga_circ_0008017	148	-14.5	148	-14.5	75733	23	557	533
gga-miR-221-3p	gga_circ_0008160	141	-17.74	141	-17.74	75785	23	528	469
gga-miR-221-3p	gga_circ_0007274	163	-16.12	163	-16.12	75969	23	547	178
gga-miR-221-3p	gga_circ_0007334	153	-16.96	153	-16.96	75985	23	475	231
gga-miR-221-3p	gga_circ_0005185	160	-21.74	160	-21.74	76089	23	315	211
gga-miR-221-3p	gga_circ_0005191	160	-21.74	160	-21.74	76091	23	364	50
gga-miR-221-3p	gga_circ_0005405	153	-17.8	153	-17.8	76169	23	347	211
gga-miR-221-3p	gga_circ_0005851	151	-13.45	151	-13.45	76377	23	448	42
gga-miR-221-3p	gga_circ_0003797	151	-16.27	151	-16.27	76503	23	474	174
gga-miR-221-3p	gga_circ_0004430	163	-27.06	163	-27.06	76753	23	393	169
gga-miR-221-3p	gga_circ_0004703	150	-16.56	150	-16.56	76857	23	247	12
gga-miR-221-3p	gga_circ_0004705	150	-16.56	150	-16.56	76859	23	178	12
gga-miR-221-3p	gga_circ_0001657	148	-13.59	148	-13.59	77031	23	219	57
gga-miR-221-3p	gga_circ_0001659	148	-13.59	148	-13.59	77033	23	370	57
gga-miR-221-3p	gga_circ_0002013	156	-14.79	156	-14.79	77157	23	182	120
gga-miR-221-3p	gga_circ_0002385	140	-13.13	140	-13.13	77287	23	702	154
gga-miR-221-3p	gga_circ_0003195	153	-16.9	153	-16.9	77627	23	286	24
gga-miR-221-3p	gga_circ_0008603	158	-21.19	158	-21.19	77691	23	492	461
gga-miR-221-3p	gga_circ_0008640	147	-15.8	147	-15.8	77707	23	403	59
gga-miR-221-3p	gga_circ_0000096	147	-11.91	147	-11.91	77739	23	236	214
gga-miR-92-5p	gga_circ_0000491	151	-23.5	151	-23.5	77823	23	303	265
gga-miR-92-5p	gga_circ_0000220	166	-21.33	166	-21.33	77867	23	383	310
gga-miR-92-5p	gga_circ_0000242	147	-19.5	147	-19.5	77875	23	546	190
gga-miR-92-5p	gga_circ_0000348	157	-22.2	157	-22.2	77919	23	353	231
gga-miR-92-5p	gga_circ_0008930	144	-17.52	144	-17.52	78171	23	120	43
gga-miR-92-5p	gga_circ_0000132	147	-19.47	147	-19.47	78349	23	405	224
gga-miR-92-5p	gga_circ_0001387	148	-17.49	148	-17.49	78367	23	324	19
gga-miR-92-5p	gga_circ_0001526	156	-19.12	156	-19.12	78413	23	300	71
gga-miR-92-5p	gga_circ_0008502	152	-18.47	152	-18.47	78559	23	443	110
gga-miR-92-5p	gga_circ_0006524	153	-15.46	153	-15.46	78905	23	381	1
gga-miR-92-5p	gga_circ_0000121	141	-16.69	141	-16.69	79013	23	284	215
gga-miR-92-5p	gga_circ_0003389	157	-21.58	157	-21.58	79147	23	458	163
gga-miR-92-5p	gga_circ_0003749	141	-15.15	141	-15.15	79163	23	229	1
gga-miR-92-5p	gga_circ_0003754	141	-18.44	141	-18.44	79165	23	412	179
gga-miR-92-5p	gga_circ_0003776	140	-18.08	140	-18.08	79179	23	552	195
gga-miR-92-5p	gga_circ_0007799	151	-18.5	151	-18.5	79199	23	354	318
gga-miR-92-5p	gga_circ_0008036	149	-16.55	149	-16.55	79279	23	500	35
gga-miR-92-5p	gga_circ_0008039	153	-17.54	153	-17.54	79281	23	330	108
gga-miR-92-5p	gga_circ_0005179	144	-20.49	144	-20.49	79619	23	270	68
gga-miR-92-5p	gga_circ_0005606	154	-18.47	154	-18.47	79801	23	270	210
gga-miR-92-5p	gga_circ_0003989	145	-15.27	145	-15.27	80115	23	572	87
gga-miR-92-5p	gga_circ_0004115	156	-16.48	156	-16.48	80181	23	626	74
gga-miR-92-5p	gga_circ_0004199	147	-15.1	147	-15.1	80207	23	310	205
gga-miR-92-5p	gga_circ_0004292	151	-21.53	151	-21.53	80239	23	336	151
gga-miR-92-5p	gga_circ_0004598	152	-19.98	152	-19.98	80361	23	252	187
gga-miR-92-5p	gga_circ_0002266	149	-17.82	149	-17.82	80777	23	381	178
gga-miR-92-5p	gga_circ_0002268	149	-17.82	149	-17.82	80779	23	306	103
gga-miR-92-5p	gga_circ_0002399	144	-16.74	144	-16.74	80831	23	365	22
gga-miR-92-5p	gga_circ_0002544	152	-22.43	152	-22.43	80903	23	294	38
gga-miR-92-5p	gga_circ_0002824	147	-17.6	147	-17.6	81013	23	326	279
gga-miR-92-5p	gga_circ_0003268	154	-18.54	154	-18.54	81177	23	487	258
gga-miR-92-5p	gga_circ_0003284	140	-13.3	140	-13.3	81183	23	453	85
gga-miR-92-5p	gga_circ_0008514	153	-18.85	153	-18.85	81203	23	427	306
gga-miR-92-5p	gga_circ_0008569	148	-14.7	148	-14.7	81219	23	469	260
gga-miR-92-5p	gga_circ_0000154	151	-19.8	151	-19.8	81271	23	264	192
gga-miR-92-3p	gga_circ_0009054	148	-10.79	148	-10.79	81755	21	684	377
gga-miR-92-3p	gga_circ_0009056	148	-10.79	148	-10.79	81757	21	552	245
gga-miR-92-3p	gga_circ_0008307	147	-12.39	147	-12.39	82013	21	346	225
gga-miR-92-3p	gga_circ_0003425	142	-15.4	142	-15.4	82101	21	412	146
gga-miR-92-3p	gga_circ_0007429	144	-15.14	144	-15.14	82171	21	401	246
gga-miR-92-3p	gga_circ_0007491	144	-10.01	144	-10.01	82189	21	357	81
gga-miR-92-3p	gga_circ_0007499	145	-14.34	145	-14.34	82195	21	685	153
gga-miR-92-3p	gga_circ_0007500	145	-14.34	145	-14.34	82197	21	393	153
gga-miR-92-3p	gga_circ_0006401	140	-11.79	140	-11.79	82393	21	482	182
gga-miR-92-3p	gga_circ_0006511	145	-14.54	145	-14.54	82435	21	446	53
gga-miR-92-3p	gga_circ_0006512	145	-14.54	145	-14.54	82437	21	443	50
gga-miR-92-3p	gga_circ_0003672	153	-12.48	153	-12.48	82589	21	809	1
gga-miR-92-3p	gga_circ_0007920	151	-12.63	151	-12.63	82769	21	305	12
gga-miR-92-3p	gga_circ_0006860	154	-22.65	154	-22.65	82873	21	255	233
gga-miR-92-3p	gga_circ_0006890	143	-12.08	143	-12.08	82879	21	569	357
gga-miR-92-3p	gga_circ_0006923	167	-27.1	167	-27.1	82889	21	261	64
gga-miR-92-3p	gga_circ_0007073	144	-10.4	144	-10.4	82953	21	464	114
gga-miR-92-3p	gga_circ_0007225	141	-14.89	141	-14.89	83011	21	316	133
gga-miR-92-3p	gga_circ_0005040	297	-27.64	149	-15.3	83075	21	321	174 157
gga-miR-92-3p	gga_circ_0005180	145	-14.47	145	-14.47	83155	21	266	55
gga-miR-92-3p	gga_circ_0003925	152	-14.78	152	-14.78	83621	21	275	210
gga-miR-92-3p	gga_circ_0003942	145	-13.01	145	-13.01	83629	21	446	285
gga-miR-92-3p	gga_circ_0004402	153	-17.9	153	-17.9	83811	21	449	428
gga-miR-92-3p	gga_circ_0004453	146	-12.41	146	-12.41	83835	21	173	91
gga-miR-92-3p	gga_circ_0005004	152	-16.27	152	-16.27	84049	21	289	211
gga-miR-92-3p	gga_circ_0002059	152	-18.72	152	-18.72	84239	21	298	57
gga-miR-92-3p	gga_circ_0002487	142	-18.19	142	-18.19	84397	21	272	4
gga-miR-92-3p	gga_circ_0002488	142	-18.19	142	-18.19	84399	21	167	4
gga-miR-92-3p	gga_circ_0002529	154	-21.93	154	-21.93	84429	21	318	197
gga-miR-92-3p	gga_circ_0002917	165	-25.08	165	-25.08	84571	21	621	326
gga-miR-92-3p	gga_circ_0002922	165	-25.08	165	-25.08	84575	21	369	74
gga-miR-92-3p	gga_circ_0008514	143	-21.09	143	-21.09	84737	21	427	269
gga-miR-92-3p	gga_circ_0008621	146	-13.95	146	-13.95	84769	21	579	220
gga-miR-19b-5p	gga_circ_0000823	168	-17.67	168	-17.67	84833	23	518	45
gga-miR-19b-5p	gga_circ_0000835	155	-17.05	155	-17.05	84841	23	259	204
gga-miR-19b-5p	gga_circ_0000846	160	-15.38	160	-15.38	84843	23	394	271
gga-miR-19b-5p	gga_circ_0000848	160	-15.38	160	-15.38	84845	23	1384	1261
gga-miR-19b-5p	gga_circ_0000849	160	-15.38	160	-15.38	84847	23	413	130
gga-miR-19b-5p	gga_circ_0000211	175	-18.2	175	-18.2	84931	23	467	26
gga-miR-19b-5p	gga_circ_0000212	175	-18.2	175	-18.2	84933	23	337	26
gga-miR-19b-5p	gga_circ_0000367	150	-17.31	150	-17.31	85003	23	349	80
gga-miR-19b-5p	gga_circ_0001243	150	-15.32	150	-15.32	85021	23	290	189
gga-miR-19b-5p	gga_circ_0008749	147	-11.78	147	-11.78	85177	23	225	202
gga-miR-19b-5p	gga_circ_0008792	147	-16.09	147	-16.09	85187	23	354	68
gga-miR-19b-5p	gga_circ_0008849	145	-17.45	145	-17.45	85209	23	284	128
gga-miR-19b-5p	gga_circ_0009081	149	-20.23	149	-20.23	85299	23	387	329
gga-miR-19b-5p	gga_circ_0009135	148	-15.3	148	-15.3	85317	23	522	270
gga-miR-19b-5p	gga_circ_0000691	146	-12.91	146	-12.91	85377	23	549	251
gga-miR-19b-5p	gga_circ_0001464	152	-12.8	152	-12.8	85451	23	199	104
gga-miR-19b-5p	gga_circ_0001509	164	-16.86	164	-16.86	85471	23	350	68
gga-miR-19b-5p	gga_circ_0000113	162	-14.88	162	-14.88	85495	23	370	152
gga-miR-19b-5p	gga_circ_0008223	168	-19.51	168	-19.51	85525	23	284	260
gga-miR-19b-5p	gga_circ_0008224	168	-19.51	168	-19.51	85527	23	496	472
gga-miR-19b-5p	gga_circ_0008268	140	-13.01	140	-13.01	85539	23	508	479
gga-miR-19b-5p	gga_circ_0008307	153	-14.33	153	-14.33	85547	23	346	190
gga-miR-19b-5p	gga_circ_0008381	143	-10.54	143	-10.54	85573	23	566	312
gga-miR-19b-5p	gga_circ_0008423	154	-16.07	154	-16.07	85589	23	498	465
gga-miR-19b-5p	gga_circ_0008425	154	-16.07	154	-16.07	85591	23	253	220
gga-miR-19b-5p	gga_circ_0008488	156	-19.09	156	-19.09	85615	23	276	133
gga-miR-19b-5p	gga_circ_0007766	146	-10.87	146	-10.87	85815	23	466	327
gga-miR-19b-5p	gga_circ_0006424	145	-14.05	145	-14.05	85937	23	347	209
gga-miR-19b-5p	gga_circ_0006524	146	-13.66	146	-13.66	85973	23	381	126
gga-miR-19b-5p	gga_circ_0008154	151	-15.34	151	-15.34	86385	23	321	146
gga-miR-19b-5p	gga_circ_0005159	154	-12.13	154	-12.13	86669	23	361	136
gga-miR-19b-5p	gga_circ_0005203	147	-13.7	147	-13.7	86705	23	395	287
gga-miR-19b-5p	gga_circ_0005204	147	-13.7	147	-13.7	86707	23	590	292
gga-miR-19b-5p	gga_circ_0005206	147	-13.7	147	-13.7	86709	23	493	195
gga-miR-19b-5p	gga_circ_0006115	160	-15.02	160	-15.02	87095	23	199	10
gga-miR-19b-5p	gga_circ_0006119	160	-15.02	160	-15.02	87097	23	137	10
gga-miR-19b-5p	gga_circ_0003914	147	-10.73	147	-10.73	87149	23	335	35
gga-miR-19b-5p	gga_circ_0003968	151	-15.77	151	-15.77	87173	23	546	328
gga-miR-19b-5p	gga_circ_0003969	151	-15.77	151	-15.77	87175	23	649	328
gga-miR-19b-5p	gga_circ_0004006	154	-14.84	154	-14.84	87197	23	264	198
gga-miR-19b-5p	gga_circ_0004007	152	-11.37	152	-11.37	87199	23	333	162
gga-miR-19b-5p	gga_circ_0004008	157	-15.22	157	-15.22	87201	23	378	207
gga-miR-19b-5p	gga_circ_0004171	148	-12.42	148	-12.42	87267	23	315	6
gga-miR-19b-5p	gga_circ_0004172	148	-12.42	148	-12.42	87269	23	227	6
gga-miR-19b-5p	gga_circ_0004223	146	-14.47	146	-14.47	87285	23	645	75
gga-miR-19b-5p	gga_circ_0004779	146	-11.93	146	-11.93	87485	23	263	1
gga-miR-19b-5p	gga_circ_0004802	151	-13.31	151	-13.31	87497	23	454	156
gga-miR-19b-5p	gga_circ_0004845	157	-15.82	157	-15.82	87521	23	444	203
gga-miR-19b-5p	gga_circ_0004998	147	-13.82	147	-13.82	87581	23	411	378
gga-miR-19b-5p	gga_circ_0001646	151	-13.25	151	-13.25	87625	23	139	39
gga-miR-19b-5p	gga_circ_0001843	162	-20.73	162	-20.73	87695	23	352	156
gga-miR-19b-5p	gga_circ_0002122	157	-11.64	157	-11.64	87791	23	177	42
gga-miR-19b-5p	gga_circ_0002168	147	-14.26	147	-14.26	87821	23	690	642
gga-miR-19b-5p	gga_circ_0002649	154	-20.79	154	-20.79	88023	23	227	133
gga-miR-19b-5p	gga_circ_0002674	154	-20.79	154	-20.79	88025	23	227	133
gga-miR-19b-5p	gga_circ_0002810	166	-19.98	166	-19.98	88073	23	265	110
gga-miR-19b-5p	gga_circ_0008690	145	-11.8	145	-11.8	88337	23	273	148
gga-miR-19b-3p	gga_circ_0000810	153	-19.76	153	-19.76	88361	23	387	158
gga-miR-19b-3p	gga_circ_0000284	155	-13.11	155	-13.11	88495	23	539	26
gga-miR-19b-3p	gga_circ_0000348	146	-15.27	146	-15.27	88521	23	353	70
gga-miR-19b-3p	gga_circ_0001078	140	-10.56	140	-10.56	88607	23	416	177
gga-miR-19b-3p	gga_circ_0008802	153	-15.31	153	-15.31	88729	23	681	192
gga-miR-19b-3p	gga_circ_0008870	145	-10.58	145	-10.58	88747	23	505	157
gga-miR-19b-3p	gga_circ_0008891	155	-16.51	155	-16.51	88757	23	637	566
gga-miR-19b-3p	gga_circ_0009054	165	-19.4	165	-19.4	88823	23	684	242
gga-miR-19b-3p	gga_circ_0009056	165	-19.4	165	-19.4	88825	23	552	110
gga-miR-19b-3p	gga_circ_0007495	142	-10.6	142	-10.6	89259	23	462	190
gga-miR-19b-3p	gga_circ_0006598	163	-17.72	163	-17.72	89529	23	619	287
gga-miR-19b-3p	gga_circ_0006756	159	-11.45	159	-11.45	89579	23	413	68
gga-miR-19b-3p	gga_circ_0006759	159	-11.45	159	-11.45	89581	23	438	300
gga-miR-19b-3p	gga_circ_0006783	149	-13.15	149	-13.15	89599	23	269	42
gga-miR-19b-3p	gga_circ_0006853	150	-17.23	150	-17.23	89939	23	693	76
gga-miR-19b-3p	gga_circ_0006990	141	-13.5	141	-13.5	89991	23	361	72
gga-miR-19b-3p	gga_circ_0007234	150	-10.58	150	-10.58	90085	23	223	82
gga-miR-19b-3p	gga_circ_0007235	150	-10.58	150	-10.58	90087	23	317	82
gga-miR-19b-3p	gga_circ_0005108	149	-16.15	149	-16.15	90181	23	413	366
gga-miR-19b-3p	gga_circ_0005112	140	-10.86	140	-10.86	90183	23	408	177
gga-miR-19b-3p	gga_circ_0005114	140	-10.86	140	-10.86	90185	23	332	101
gga-miR-19b-3p	gga_circ_0005185	162	-13.3	162	-13.3	90225	23	315	234
gga-miR-19b-3p	gga_circ_0005191	162	-13.3	162	-13.3	90227	23	364	73
gga-miR-19b-3p	gga_circ_0005401	146	-10.83	146	-10.83	90299	23	360	90
gga-miR-19b-3p	gga_circ_0005402	146	-10.83	146	-10.83	90301	23	235	90
gga-miR-19b-3p	gga_circ_0005404	146	-10.83	146	-10.83	90303	23	550	90
gga-miR-19b-3p	gga_circ_0005425	156	-13.5	156	-13.5	90319	23	394	181
gga-miR-19b-3p	gga_circ_0005487	304	-33.63	160	-18.67	90333	23	354	204 106
gga-miR-19b-3p	gga_circ_0005591	149	-14.08	149	-14.08	90391	23	617	312
gga-miR-19b-3p	gga_circ_0005619	166	-19.33	166	-19.33	90409	23	329	283
gga-miR-19b-3p	gga_circ_0005713	151	-13.84	151	-13.84	90447	23	475	435
gga-miR-19b-3p	gga_circ_0004007	154	-11.11	154	-11.11	90733	23	333	44
gga-miR-19b-3p	gga_circ_0004039	152	-13.5	152	-13.5	90751	23	443	217
gga-miR-19b-3p	gga_circ_0004529	154	-15.61	154	-15.61	90929	23	293	115
gga-miR-19b-3p	gga_circ_0004555	145	-10.04	145	-10.04	90949	23	264	202
gga-miR-19b-3p	gga_circ_0004926	147	-14.08	147	-14.08	91089	23	309	98
gga-miR-19b-3p	gga_circ_0004998	155	-11.49	155	-11.49	91115	23	411	77
gga-miR-19b-3p	gga_circ_0001786	155	-15.28	155	-15.28	91209	23	290	39
gga-miR-19b-3p	gga_circ_0001788	155	-15.28	155	-15.28	91211	23	578	39
gga-miR-19b-3p	gga_circ_0001923	141	-14.56	141	-14.56	91261	23	491	102
gga-miR-19b-3p	gga_circ_0002016	140	-10.17	140	-10.17	91295	23	415	344
gga-miR-19b-3p	gga_circ_0002168	148	-11.63	148	-11.63	91355	23	690	615
gga-miR-19b-3p	gga_circ_0002454	147	-11.63	147	-11.63	91453	23	221	25
gga-miR-20a-5p	gga_circ_0000374	148	-14.85	148	-14.85	92075	23	246	75
gga-miR-20a-5p	gga_circ_0001300	154	-15.53	154	-15.53	92109	23	258	89
gga-miR-20a-5p	gga_circ_0001310	154	-15.53	154	-15.53	92115	23	417	294
gga-miR-20a-5p	gga_circ_0001325	147	-14.57	147	-14.57	92123	23	359	172
gga-miR-20a-5p	gga_circ_0001100	149	-18.08	149	-18.08	92143	23	502	53
gga-miR-20a-5p	gga_circ_0001101	149	-18.08	149	-18.08	92145	23	377	53
gga-miR-20a-5p	gga_circ_0008792	152	-13.45	152	-13.45	92255	23	354	1
gga-miR-20a-5p	gga_circ_0008809	163	-17.87	163	-17.87	92265	23	404	162
gga-miR-20a-5p	gga_circ_0008811	149	-17.4	149	-17.4	92267	23	300	224
gga-miR-20a-5p	gga_circ_0008891	158	-16.06	158	-16.06	92291	23	637	436
gga-miR-20a-5p	gga_circ_0009107	156	-13.15	156	-13.15	92375	23	430	5
gga-miR-20a-5p	gga_circ_0009108	156	-13.15	156	-13.15	92377	23	393	5
gga-miR-20a-5p	gga_circ_0009109	156	-13.15	156	-13.15	92379	23	418	5
gga-miR-20a-5p	gga_circ_0008422	150	-17.33	150	-17.33	92655	23	273	184
gga-miR-20a-5p	gga_circ_0003462	157	-22.88	157	-22.88	92719	23	480	170
gga-miR-20a-5p	gga_circ_0000137	173	-23.7	173	-23.7	92745	23	237	188
gga-miR-20a-5p	gga_circ_0006189	160	-14.17	160	-14.17	92913	23	331	247
gga-miR-20a-5p	gga_circ_0006228	158	-19.56	158	-19.56	92933	23	372	199
gga-miR-20a-5p	gga_circ_0006289	151	-16.2	151	-16.2	92965	23	411	104
gga-miR-20a-5p	gga_circ_0006511	164	-15.22	164	-15.22	93037	23	446	106
gga-miR-20a-5p	gga_circ_0006512	164	-15.22	164	-15.22	93039	23	443	103
gga-miR-20a-5p	gga_circ_0006648	143	-13.41	143	-13.41	93089	23	461	3
gga-miR-20a-5p	gga_circ_0006733	161	-24.37	161	-24.37	93111	23	370	253
gga-miR-20a-5p	gga_circ_0006759	159	-15.83	159	-15.83	93115	23	438	176
gga-miR-20a-5p	gga_circ_0006767	154	-17.91	154	-17.91	93117	23	189	65
gga-miR-20a-5p	gga_circ_0006768	147	-12.98	147	-12.98	93119	23	454	330
gga-miR-20a-5p	gga_circ_0006772	148	-13.93	148	-13.93	93121	23	251	190
gga-miR-20a-5p	gga_circ_0006773	148	-13.93	148	-13.93	93123	23	302	241
gga-miR-20a-5p	gga_circ_0006774	298	-29.75	150	-15.82	93125	23	461	127 400
gga-miR-20a-5p	gga_circ_0006775	298	-29.75	150	-15.82	93127	23	544	210 483
gga-miR-20a-5p	gga_circ_0006779	150	-15.82	150	-15.82	93129	23	314	127
gga-miR-20a-5p	gga_circ_0006780	150	-15.82	150	-15.82	93131	23	397	210
gga-miR-20a-5p	gga_circ_0006783	150	-15.82	150	-15.82	93133	23	269	186
gga-miR-20a-5p	gga_circ_0003568	159	-19.25	159	-19.25	93249	23	273	96
gga-miR-20a-5p	gga_circ_0003421	150	-16.1	150	-16.1	93293	23	537	180
gga-miR-20a-5p	gga_circ_0003422	150	-16.1	150	-16.1	93295	23	225	180
gga-miR-20a-5p	gga_circ_0008075	151	-14.12	151	-14.12	93431	23	370	301
gga-miR-20a-5p	gga_circ_0005055	163	-17.62	163	-17.62	93681	23	445	10
gga-miR-20a-5p	gga_circ_0005065	160	-18.39	160	-18.39	93687	23	413	160
gga-miR-20a-5p	gga_circ_0005066	160	-18.39	160	-18.39	93689	23	377	124
gga-miR-20a-5p	gga_circ_0005067	160	-18.39	160	-18.39	93691	23	711	458
gga-miR-20a-5p	gga_circ_0005175	154	-16.04	154	-16.04	93751	23	590	351
gga-miR-20a-5p	gga_circ_0005177	155	-16.04	155	-16.04	93753	23	564	325
gga-miR-20a-5p	gga_circ_0005508	165	-16.36	165	-16.36	93881	23	309	48
gga-miR-20a-5p	gga_circ_0005509	165	-16.36	165	-16.36	93883	23	386	125
gga-miR-20a-5p	gga_circ_0005510	165	-16.36	165	-16.36	93885	23	389	128
gga-miR-20a-5p	gga_circ_0005511	165	-16.36	165	-16.36	93887	23	563	302
gga-miR-20a-5p	gga_circ_0005513	165	-16.36	165	-16.36	93889	23	280	128
gga-miR-20a-5p	gga_circ_0005521	160	-11.8	160	-11.8	93891	23	341	189
gga-miR-20a-5p	gga_circ_0005791	145	-11.67	145	-11.67	94019	23	450	243
gga-miR-20a-5p	gga_circ_0005818	166	-18.5	166	-18.5	94027	23	234	154
gga-miR-20a-5p	gga_circ_0005903	151	-11.75	151	-11.75	94069	23	270	1
gga-miR-20a-5p	gga_circ_0005926	147	-17.77	147	-17.77	94081	23	465	150
gga-miR-20a-5p	gga_circ_0005995	152	-15.29	152	-15.29	94121	23	169	28
gga-miR-20a-5p	gga_circ_0006089	159	-22.63	159	-22.63	94151	23	356	122
gga-miR-20a-5p	gga_circ_0004007	163	-19.48	163	-19.48	94267	23	333	46
gga-miR-20a-5p	gga_circ_0004128	154	-19.1	154	-19.1	94321	23	377	81
gga-miR-20a-5p	gga_circ_0004150	152	-13.06	152	-13.06	94329	23	270	129
gga-miR-20a-5p	gga_circ_0004151	152	-13.06	152	-13.06	94331	23	357	216
gga-miR-20a-5p	gga_circ_0004529	159	-21.26	159	-21.26	94463	23	293	127
gga-miR-20a-5p	gga_circ_0004557	162	-15.81	162	-15.81	94485	23	537	176
gga-miR-20a-5p	gga_circ_0004577	140	-10.82	140	-10.82	94489	23	257	1
gga-miR-20a-5p	gga_circ_0004578	148	-15.32	148	-15.32	94491	23	357	88
gga-miR-20a-5p	gga_circ_0004631	150	-11.77	150	-11.77	94513	23	257	130
gga-miR-20a-5p	gga_circ_0004636	144	-12.53	144	-12.53	94515	23	611	586
gga-miR-20a-5p	gga_circ_0004830	150	-16.58	150	-16.58	94585	23	527	491
gga-miR-20a-5p	gga_circ_0001818	156	-14.73	156	-14.73	94751	23	227	48
gga-miR-20a-5p	gga_circ_0001819	156	-14.73	156	-14.73	94753	23	506	48
gga-miR-20a-5p	gga_circ_0001923	152	-16.69	152	-16.69	94795	23	491	459
gga-miR-20a-5p	gga_circ_0001984	154	-16.47	154	-16.47	94811	23	349	185
gga-miR-20a-5p	gga_circ_0002155	158	-14.23	158	-14.23	94875	23	337	16
gga-miR-20a-5p	gga_circ_0002157	150	-20.28	150	-20.28	94879	23	396	120
gga-miR-20a-5p	gga_circ_0002168	147	-15.11	147	-15.11	94889	23	690	608
gga-miR-20a-5p	gga_circ_0002385	157	-12.35	157	-12.35	94957	23	702	15
gga-miR-20a-5p	gga_circ_0002388	157	-15.19	157	-15.19	94961	23	326	29
gga-miR-20a-5p	gga_circ_0002513	149	-16.32	149	-16.32	95013	23	504	115
gga-miR-20a-5p	gga_circ_0002515	149	-16.32	149	-16.32	95015	23	299	115
gga-miR-20a-5p	gga_circ_0002517	149	-16.32	149	-16.32	95017	23	228	115
gga-miR-20a-5p	gga_circ_0002520	158	-21.36	158	-21.36	95019	23	206	86
gga-miR-20a-5p	gga_circ_0002521	158	-21.36	158	-21.36	95021	23	300	180
gga-miR-20a-5p	gga_circ_0002583	152	-14.36	152	-14.36	95057	23	326	296
gga-miR-20a-5p	gga_circ_0002588	152	-17.18	152	-17.18	95059	23	410	274
gga-miR-20a-5p	gga_circ_0003274	140	-15.27	140	-15.27	95315	23	516	53
gga-miR-20a-5p	gga_circ_0008666	153	-11.36	153	-11.36	95385	23	304	170
gga-miR-20a-5p	gga_circ_0008667	153	-11.36	153	-11.36	95387	23	317	170
gga-miR-20a-3p	gga_circ_0000525	173	-19.34	173	-19.34	95509	28	593	108
gga-miR-20a-3p	gga_circ_0000582	151	-15.5	151	-15.5	95525	28	319	127
gga-miR-20a-3p	gga_circ_0001325	162	-20.63	162	-20.63	95657	28	359	131
gga-miR-20a-3p	gga_circ_0008747	157	-15.76	157	-15.76	95777	28	362	26
gga-miR-20a-3p	gga_circ_0000066	152	-15.95	152	-15.95	96235	28	303	105
gga-miR-20a-3p	gga_circ_0006204	160	-19.21	160	-19.21	96449	28	377	100
gga-miR-20a-3p	gga_circ_0006245	151	-14.36	151	-14.36	96477	28	447	160
gga-miR-20a-3p	gga_circ_0006247	151	-14.36	151	-14.36	96479	28	216	160
gga-miR-20a-3p	gga_circ_0006248	151	-14.36	151	-14.36	96481	28	342	160
gga-miR-20a-3p	gga_circ_0006651	162	-12.41	162	-12.41	96625	28	246	92
gga-miR-20a-3p	gga_circ_0008039	156	-15.07	156	-15.07	96951	28	330	182
gga-miR-20a-3p	gga_circ_0005521	169	-16.9	169	-16.9	97425	28	341	114
gga-miR-20a-3p	gga_circ_0005698	148	-12.42	148	-12.42	97509	28	418	319
gga-miR-20a-3p	gga_circ_0006101	162	-17.16	162	-17.16	97691	28	466	268
gga-miR-20a-3p	gga_circ_0004778	157	-11.22	157	-11.22	98085	28	279	144
gga-miR-20a-3p	gga_circ_0004853	154	-11.85	154	-11.85	98129	28	290	41
gga-miR-20a-3p	gga_circ_0004915	153	-12.15	153	-12.15	98151	28	498	231
gga-miR-20a-3p	gga_circ_0001584	144	-12.53	144	-12.53	98207	28	460	421
gga-miR-20a-3p	gga_circ_0001623	145	-12.7	145	-12.7	98221	28	1248	263
gga-miR-20a-3p	gga_circ_0001652	163	-18.39	163	-18.39	98229	28	1842	511
gga-miR-20a-3p	gga_circ_0001723	152	-11.99	152	-11.99	98249	28	368	168
gga-miR-20a-3p	gga_circ_0002777	158	-13.12	158	-13.12	98661	28	359	199
gga-miR-20a-3p	gga_circ_0003106	151	-10.72	151	-10.72	98789	28	828	522
gga-miR-19a-5p	gga_circ_0000835	157	-13.55	157	-13.55	98977	21	259	209
gga-miR-19a-5p	gga_circ_0000846	143	-10.94	143	-10.94	98979	21	394	272
gga-miR-19a-5p	gga_circ_0000848	143	-10.94	143	-10.94	98981	21	1384	1262
gga-miR-19a-5p	gga_circ_0000849	143	-10.94	143	-10.94	98983	21	413	131
gga-miR-19a-5p	gga_circ_0000211	162	-14.76	162	-14.76	99067	21	467	30
gga-miR-19a-5p	gga_circ_0000212	162	-14.76	162	-14.76	99069	21	337	30
gga-miR-19a-5p	gga_circ_0000367	157	-10.88	157	-10.88	99139	21	349	83
gga-miR-19a-5p	gga_circ_0001243	143	-10.46	143	-10.46	99157	21	290	195
gga-miR-19a-5p	gga_circ_0008749	142	-14.84	142	-14.84	99313	21	225	203
gga-miR-19a-5p	gga_circ_0009081	144	-11.53	144	-11.53	99435	21	387	338
gga-miR-19a-5p	gga_circ_0009135	156	-16.54	156	-16.54	99453	21	522	269
gga-miR-19a-5p	gga_circ_0001464	144	-12.55	144	-12.55	99587	21	199	106
gga-miR-19a-5p	gga_circ_0001509	154	-11.83	154	-11.83	99607	21	350	70
gga-miR-19a-5p	gga_circ_0000113	170	-18.44	170	-18.44	99631	21	370	156
gga-miR-19a-5p	gga_circ_0008223	154	-13.12	154	-13.12	99661	21	284	262
gga-miR-19a-5p	gga_circ_0008224	154	-13.12	154	-13.12	99663	21	496	474
gga-miR-19a-5p	gga_circ_0008268	146	-10.89	146	-10.89	99675	21	508	480
gga-miR-19a-5p	gga_circ_0008307	148	-10.8	148	-10.8	99683	21	346	191
gga-miR-19a-5p	gga_circ_0008381	140	-11.12	140	-11.12	99709	21	566	314
gga-miR-19a-5p	gga_circ_0008423	148	-10.13	148	-10.13	99725	21	498	468
gga-miR-19a-5p	gga_circ_0008425	148	-10.13	148	-10.13	99727	21	253	223
gga-miR-19a-5p	gga_circ_0008488	156	-13.23	156	-13.23	99751	21	276	135
gga-miR-19a-5p	gga_circ_0006524	143	-10.06	143	-10.06	100109	21	381	128
gga-miR-19a-5p	gga_circ_0008154	150	-13.41	150	-13.41	100521	21	321	148
gga-miR-19a-5p	gga_circ_0005159	161	-16.25	161	-16.25	100805	21	361	135
gga-miR-19a-5p	gga_circ_0005169	149	-12.89	149	-12.89	100813	21	330	305
gga-miR-19a-5p	gga_circ_0006115	160	-14.12	160	-14.12	101231	21	199	12
gga-miR-19a-5p	gga_circ_0006119	160	-14.12	160	-14.12	101233	21	137	12
gga-miR-19a-5p	gga_circ_0003968	151	-12.47	151	-12.47	101309	21	546	326
gga-miR-19a-5p	gga_circ_0003969	151	-12.47	151	-12.47	101311	21	649	326
gga-miR-19a-5p	gga_circ_0004007	148	-11.31	148	-11.31	101335	21	333	161
gga-miR-19a-5p	gga_circ_0004008	148	-11.31	148	-11.31	101337	21	378	206
gga-miR-19a-5p	gga_circ_0004171	158	-14.26	158	-14.26	101403	21	315	13
gga-miR-19a-5p	gga_circ_0004172	158	-14.26	158	-14.26	101405	21	227	13
gga-miR-19a-5p	gga_circ_0004223	147	-12.25	147	-12.25	101421	21	645	74
gga-miR-19a-5p	gga_circ_0004998	140	-10.03	140	-10.03	101717	21	411	380
gga-miR-19a-5p	gga_circ_0001843	154	-12.22	154	-12.22	101831	21	352	161
gga-miR-19a-5p	gga_circ_0002122	155	-10.68	155	-10.68	101927	21	177	45
gga-miR-19a-5p	gga_circ_0002649	146	-11.05	146	-11.05	102159	21	227	134
gga-miR-19a-5p	gga_circ_0002674	146	-11.05	146	-11.05	102161	21	227	134
gga-miR-19a-5p	gga_circ_0002810	150	-14.08	150	-14.08	102209	21	265	113
gga-miR-19a-5p	gga_circ_0008690	142	-11.2	142	-11.2	102473	21	273	151
gga-miR-19a-3p	gga_circ_0000810	153	-20.27	153	-20.27	102497	23	387	158
gga-miR-19a-3p	gga_circ_0000284	155	-13.11	155	-13.11	102631	23	539	26
gga-miR-19a-3p	gga_circ_0000348	151	-16.66	151	-16.66	102657	23	353	68
gga-miR-19a-3p	gga_circ_0001078	143	-10.18	143	-10.18	102743	23	416	175
gga-miR-19a-3p	gga_circ_0008796	160	-15.09	160	-15.09	102859	23	339	22
gga-miR-19a-3p	gga_circ_0008798	160	-15.09	160	-15.09	102863	23	494	177
gga-miR-19a-3p	gga_circ_0008802	309	-28.97	160	-15.09	102865	23	681	422 192
gga-miR-19a-3p	gga_circ_0008891	151	-13.8	151	-13.8	102893	23	637	566
gga-miR-19a-3p	gga_circ_0009054	161	-16.46	161	-16.46	102959	23	684	242
gga-miR-19a-3p	gga_circ_0009056	161	-16.46	161	-16.46	102961	23	552	110
gga-miR-19a-3p	gga_circ_0007495	142	-11.32	142	-11.32	103395	23	462	190
gga-miR-19a-3p	gga_circ_0006598	163	-18.73	163	-18.73	103665	23	619	287
gga-miR-19a-3p	gga_circ_0006756	159	-12.06	159	-12.06	103715	23	413	68
gga-miR-19a-3p	gga_circ_0006759	159	-12.06	159	-12.06	103717	23	438	300
gga-miR-19a-3p	gga_circ_0006783	148	-11.69	148	-11.69	103735	23	269	40
gga-miR-19a-3p	gga_circ_0006853	150	-17.23	150	-17.23	104075	23	693	76
gga-miR-19a-3p	gga_circ_0006990	142	-13.8	142	-13.8	104127	23	361	70
gga-miR-19a-3p	gga_circ_0007234	150	-10.58	150	-10.58	104221	23	223	82
gga-miR-19a-3p	gga_circ_0007235	150	-10.58	150	-10.58	104223	23	317	82
gga-miR-19a-3p	gga_circ_0005108	149	-15.2	149	-15.2	104317	23	413	366
gga-miR-19a-3p	gga_circ_0005112	141	-10.86	141	-10.86	104319	23	408	175
gga-miR-19a-3p	gga_circ_0005114	141	-10.86	141	-10.86	104321	23	332	99
gga-miR-19a-3p	gga_circ_0005185	162	-13.3	162	-13.3	104361	23	315	234
gga-miR-19a-3p	gga_circ_0005191	162	-13.3	162	-13.3	104363	23	364	73
gga-miR-19a-3p	gga_circ_0005401	146	-10.91	146	-10.91	104435	23	360	90
gga-miR-19a-3p	gga_circ_0005402	146	-10.91	146	-10.91	104437	23	235	90
gga-miR-19a-3p	gga_circ_0005404	146	-10.91	146	-10.91	104439	23	550	90
gga-miR-19a-3p	gga_circ_0005425	152	-10.56	152	-10.56	104455	23	394	181
gga-miR-19a-3p	gga_circ_0005487	313	-34.42	163	-17.89	104469	23	354	206 110
gga-miR-19a-3p	gga_circ_0005591	157	-17.57	157	-17.57	104527	23	617	312
gga-miR-19a-3p	gga_circ_0005619	162	-16.62	162	-16.62	104545	23	329	283
gga-miR-19a-3p	gga_circ_0005713	151	-13.84	151	-13.84	104583	23	475	435
gga-miR-19a-3p	gga_circ_0004007	154	-11.11	154	-11.11	104869	23	333	44
gga-miR-19a-3p	gga_circ_0004039	148	-13.08	148	-13.08	104887	23	443	217
gga-miR-19a-3p	gga_circ_0004529	162	-17.98	162	-17.98	105065	23	293	115
gga-miR-19a-3p	gga_circ_0004555	145	-10.04	145	-10.04	105085	23	264	202
gga-miR-19a-3p	gga_circ_0004926	145	-14.08	145	-14.08	105225	23	309	98
gga-miR-19a-3p	gga_circ_0004998	151	-11.49	151	-11.49	105251	23	411	77
gga-miR-19a-3p	gga_circ_0001786	151	-12.57	151	-12.57	105345	23	290	39
gga-miR-19a-3p	gga_circ_0001788	151	-12.57	151	-12.57	105347	23	578	39
gga-miR-19a-3p	gga_circ_0001923	141	-15.24	141	-15.24	105397	23	491	102
gga-miR-19a-3p	gga_circ_0002016	144	-10.17	144	-10.17	105431	23	415	344
gga-miR-19a-3p	gga_circ_0002168	147	-11.63	147	-11.63	105491	23	690	614
gga-miR-19a-3p	gga_circ_0002454	152	-11.63	152	-11.63	105589	23	221	23
gga-miR-18a-5p	gga_circ_0000269	148	-17.46	148	-17.46	106161	22	471	233
gga-miR-18a-5p	gga_circ_0001295	150	-16.68	150	-16.68	106241	22	363	269
gga-miR-18a-5p	gga_circ_0009026	149	-13.45	149	-13.45	106483	22	286	50
gga-miR-18a-5p	gga_circ_0001490	147	-13.81	147	-13.81	106669	22	363	339
gga-miR-18a-5p	gga_circ_0003482	148	-22.4	148	-22.4	106863	22	329	80
gga-miR-18a-5p	gga_circ_0006567	158	-18.55	158	-18.55	107183	22	196	141
gga-miR-18a-5p	gga_circ_0006590	143	-13.62	143	-13.62	107193	22	424	214
gga-miR-18a-5p	gga_circ_0007911	148	-17.61	148	-17.61	107501	22	464	172
gga-miR-18a-5p	gga_circ_0006903	148	-18.15	148	-18.15	107621	22	582	384
gga-miR-18a-5p	gga_circ_0006909	162	-15.74	162	-15.74	107623	22	408	242
gga-miR-18a-5p	gga_circ_0007108	302	-34.6	157	-21.74	107701	22	206	38 1
gga-miR-18a-5p	gga_circ_0007140	147	-10.81	147	-10.81	107711	22	471	414
gga-miR-18a-5p	gga_circ_0005224	162	-21.94	162	-21.94	107917	22	521	429
gga-miR-18a-5p	gga_circ_0005888	146	-15.32	146	-15.32	108199	22	485	225
gga-miR-18a-5p	gga_circ_0005889	146	-15.32	146	-15.32	108201	22	507	225
gga-miR-18a-5p	gga_circ_0005923	148	-11.57	148	-11.57	108215	22	435	52
gga-miR-18a-5p	gga_circ_0003850	153	-16.52	153	-16.52	108329	22	567	174
gga-miR-18a-5p	gga_circ_0004468	157	-21.52	157	-21.52	108577	22	562	366
gga-miR-18a-5p	gga_circ_0004533	142	-14.55	142	-14.55	108601	22	290	38
gga-miR-18a-5p	gga_circ_0004916	161	-18.9	161	-18.9	108755	22	357	112
gga-miR-18a-5p	gga_circ_0001860	144	-15.39	144	-15.39	108911	22	121	90
gga-miR-18a-5p	gga_circ_0001989	143	-11.38	143	-11.38	108951	22	374	1
gga-miR-18a-5p	gga_circ_0001994	143	-11.38	143	-11.38	108955	22	355	1
gga-miR-18a-5p	gga_circ_0001996	143	-11.38	143	-11.38	108957	22	351	1
gga-miR-18a-5p	gga_circ_0002899	147	-13.82	147	-13.82	109307	22	366	241
gga-miR-18a-5p	gga_circ_0003207	155	-18.18	155	-18.18	109435	22	262	209
gga-miR-18a-5p	gga_circ_0003261	145	-14.49	145	-14.49	109447	22	522	302
gga-miR-18a-3p	gga_circ_0000487	160	-22.52	160	-22.52	109627	22	266	138
gga-miR-18a-3p	gga_circ_0000505	148	-22.54	148	-22.54	109637	22	352	30
gga-miR-18a-3p	gga_circ_0000269	150	-20.87	150	-20.87	109695	22	471	149
gga-miR-18a-3p	gga_circ_0001111	143	-20.58	143	-20.58	109825	22	612	477
gga-miR-18a-3p	gga_circ_0000931	143	-19.72	143	-19.72	109857	22	291	39
gga-miR-18a-3p	gga_circ_0000932	294	-38.41	149	-19.8	109859	22	713	520 214
gga-miR-18a-3p	gga_circ_0008789	141	-16.4	141	-16.4	109923	22	395	33
gga-miR-18a-3p	gga_circ_0008930	148	-15.82	148	-15.82	109977	22	120	21
gga-miR-18a-3p	gga_circ_0008948	158	-21.49	158	-21.49	109987	22	586	34
gga-miR-18a-3p	gga_circ_0008982	159	-21.6	159	-21.6	109999	22	81	50
gga-miR-18a-3p	gga_circ_0008984	140	-15.79	140	-15.79	110001	22	433	282
gga-miR-18a-3p	gga_circ_0000604	147	-25.28	147	-25.28	110081	22	401	300
gga-miR-18a-3p	gga_circ_0001387	155	-26.41	155	-26.41	110173	22	324	180
gga-miR-18a-3p	gga_circ_0001406	158	-21.17	158	-21.17	110179	22	1213	727
gga-miR-18a-3p	gga_circ_0001519	149	-22.51	149	-22.51	110215	22	426	312
gga-miR-18a-3p	gga_circ_0000117	140	-16.88	140	-16.88	110249	22	236	184
gga-miR-18a-3p	gga_circ_0008289	146	-19.15	146	-19.15	110279	22	350	139
gga-miR-18a-3p	gga_circ_0008314	156	-20.73	156	-20.73	110287	22	255	24
gga-miR-18a-3p	gga_circ_0008315	156	-20.73	156	-20.73	110289	22	487	24
gga-miR-18a-3p	gga_circ_0008485	165	-23.45	165	-23.45	110349	22	245	151
gga-miR-18a-3p	gga_circ_0003433	157	-20.02	157	-20.02	110375	22	324	100
gga-miR-18a-3p	gga_circ_0003437	157	-20.02	157	-20.02	110377	22	274	149
gga-miR-18a-3p	gga_circ_0003483	155	-21.91	155	-21.91	110399	22	410	80
gga-miR-18a-3p	gga_circ_0000074	151	-17.81	151	-17.81	110411	22	498	314
gga-miR-18a-3p	gga_circ_0000075	151	-17.81	151	-17.81	110413	22	549	365
gga-miR-18a-3p	gga_circ_0007685	140	-13.76	140	-13.76	110521	22	306	115
gga-miR-18a-3p	gga_circ_0007686	140	-13.76	140	-13.76	110523	22	593	115
gga-miR-18a-3p	gga_circ_0007764	149	-19.85	149	-19.85	110551	22	407	159
gga-miR-18a-3p	gga_circ_0006134	151	-21.04	151	-21.04	110569	22	683	233
gga-miR-18a-3p	gga_circ_0006382	146	-20.54	146	-20.54	110659	22	217	49
gga-miR-18a-3p	gga_circ_0006424	152	-18.61	152	-18.61	110675	22	347	286
gga-miR-18a-3p	gga_circ_0003332	140	-15.74	140	-15.74	110935	22	361	212
gga-miR-18a-3p	gga_circ_0003349	148	-17.74	148	-17.74	110943	22	314	227
gga-miR-18a-3p	gga_circ_0003785	162	-18.44	162	-18.44	110995	22	495	29
gga-miR-18a-3p	gga_circ_0007986	150	-22.48	150	-22.48	111065	22	363	90
gga-miR-18a-3p	gga_circ_0006937	140	-18.46	140	-18.46	111169	22	463	161
gga-miR-18a-3p	gga_circ_0007203	145	-18.58	145	-18.58	111269	22	299	163
gga-miR-18a-3p	gga_circ_0007297	314	-39.26	160	-21.31	111315	22	278	235 79
gga-miR-18a-3p	gga_circ_0007298	314	-39.26	160	-21.31	111317	22	473	430 274
gga-miR-18a-3p	gga_circ_0005060	140	-16.35	140	-16.35	111353	22	314	173
gga-miR-18a-3p	gga_circ_0005148	154	-21.97	154	-21.97	111401	22	376	249
gga-miR-18a-3p	gga_circ_0005149	154	-21.97	154	-21.97	111403	22	321	194
gga-miR-18a-3p	gga_circ_0003877	146	-20.14	146	-20.14	111871	22	428	128
gga-miR-18a-3p	gga_circ_0003925	145	-15.22	145	-15.22	111893	22	275	42
gga-miR-18a-3p	gga_circ_0004223	148	-18.59	148	-18.59	112023	22	645	418
gga-miR-18a-3p	gga_circ_0004468	140	-14.47	140	-14.47	112111	22	562	343
gga-miR-18a-3p	gga_circ_0004859	145	-20.76	145	-20.76	112267	22	417	19
gga-miR-18a-3p	gga_circ_0001891	141	-18	141	-18	112455	22	667	613
gga-miR-18a-3p	gga_circ_0001894	141	-18	141	-18	112457	22	482	428
gga-miR-18a-3p	gga_circ_0002047	291	-38.08	150	-21.4	112505	22	484	83 352
gga-miR-18a-3p	gga_circ_0002048	141	-16.68	141	-16.68	112507	22	318	77
gga-miR-18a-3p	gga_circ_0002741	146	-19.81	146	-19.81	112787	22	336	231
gga-miR-18a-3p	gga_circ_0002792	152	-16.85	152	-16.85	112809	22	387	14
gga-miR-18a-3p	gga_circ_0002820	293	-40.47	153	-22.97	112817	22	599	352 26
gga-miR-18a-3p	gga_circ_0003021	141	-16.39	141	-16.39	112885	22	426	26
gga-miR-18a-3p	gga_circ_0008533	140	-16.03	140	-16.03	113013	22	429	135
gga-miR-18a-3p	gga_circ_0008684	157	-23.76	157	-23.76	113069	22	269	221
gga-miR-18a-3p	gga_circ_0008690	171	-30.53	171	-30.53	113075	22	273	142
gga-miR-18a-3p	gga_circ_0000026	154	-28.25	154	-28.25	113087	22	128	51
gga-miR-17-5p	gga_circ_0000374	152	-14.73	152	-14.73	113279	24	246	74
gga-miR-17-5p	gga_circ_0001300	149	-11.6	149	-11.6	113313	24	258	91
gga-miR-17-5p	gga_circ_0001310	149	-11.6	149	-11.6	113319	24	417	296
gga-miR-17-5p	gga_circ_0001325	152	-23.81	152	-23.81	113327	24	359	167
gga-miR-17-5p	gga_circ_0001100	153	-24.66	153	-24.66	113347	24	502	50
gga-miR-17-5p	gga_circ_0001101	153	-24.66	153	-24.66	113349	24	377	50
gga-miR-17-5p	gga_circ_0008792	147	-13.5	147	-13.5	113459	24	354	1
gga-miR-17-5p	gga_circ_0008809	167	-21.97	167	-21.97	113469	24	404	161
gga-miR-17-5p	gga_circ_0008811	151	-20.56	151	-20.56	113471	24	300	218
gga-miR-17-5p	gga_circ_0008891	160	-14.61	160	-14.61	113495	24	637	435
gga-miR-17-5p	gga_circ_0009107	148	-10.71	148	-10.71	113579	24	430	4
gga-miR-17-5p	gga_circ_0009108	148	-10.71	148	-10.71	113581	24	393	4
gga-miR-17-5p	gga_circ_0009109	148	-10.71	148	-10.71	113583	24	418	4
gga-miR-17-5p	gga_circ_0008422	159	-20.4	159	-20.4	113859	24	273	183
gga-miR-17-5p	gga_circ_0003462	157	-25.02	157	-25.02	113923	24	480	169
gga-miR-17-5p	gga_circ_0000137	177	-25.02	177	-25.02	113949	24	237	187
gga-miR-17-5p	gga_circ_0006189	162	-15.33	162	-15.33	114117	24	331	245
gga-miR-17-5p	gga_circ_0006228	162	-18.62	162	-18.62	114137	24	372	198
gga-miR-17-5p	gga_circ_0006289	146	-12.36	146	-12.36	114169	24	411	101
gga-miR-17-5p	gga_circ_0006511	156	-14.32	156	-14.32	114241	24	446	105
gga-miR-17-5p	gga_circ_0006512	156	-14.32	156	-14.32	114243	24	443	102
gga-miR-17-5p	gga_circ_0006648	140	-15.6	140	-15.6	114293	24	461	3
gga-miR-17-5p	gga_circ_0006733	165	-29.22	165	-29.22	114315	24	370	252
gga-miR-17-5p	gga_circ_0006759	151	-11.83	151	-11.83	114319	24	438	175
gga-miR-17-5p	gga_circ_0006767	149	-20.06	149	-20.06	114321	24	189	64
gga-miR-17-5p	gga_circ_0006768	146	-15.09	146	-15.09	114323	24	454	332
gga-miR-17-5p	gga_circ_0006772	144	-15.43	144	-15.43	114325	24	251	191
gga-miR-17-5p	gga_circ_0006773	144	-15.43	144	-15.43	114327	24	302	242
gga-miR-17-5p	gga_circ_0006774	298	-30.18	154	-15.43	114329	24	461	128 401
gga-miR-17-5p	gga_circ_0006775	298	-30.18	154	-15.43	114331	24	544	211 484
gga-miR-17-5p	gga_circ_0006779	154	-14.75	154	-14.75	114333	24	314	128
gga-miR-17-5p	gga_circ_0006780	154	-14.75	154	-14.75	114335	24	397	211
gga-miR-17-5p	gga_circ_0006783	154	-14.75	154	-14.75	114337	24	269	187
gga-miR-17-5p	gga_circ_0003568	163	-23.35	163	-23.35	114453	24	273	95
gga-miR-17-5p	gga_circ_0003421	153	-18.96	153	-18.96	114497	24	537	178
gga-miR-17-5p	gga_circ_0003422	153	-18.96	153	-18.96	114499	24	225	178
gga-miR-17-5p	gga_circ_0008075	155	-15.62	155	-15.62	114635	24	370	300
gga-miR-17-5p	gga_circ_0005055	155	-19.73	155	-19.73	114885	24	445	9
gga-miR-17-5p	gga_circ_0005065	153	-19.42	153	-19.42	114891	24	413	163
gga-miR-17-5p	gga_circ_0005066	153	-19.42	153	-19.42	114893	24	377	127
gga-miR-17-5p	gga_circ_0005067	153	-19.42	153	-19.42	114895	24	711	461
gga-miR-17-5p	gga_circ_0005175	154	-15.14	154	-15.14	114955	24	590	356
gga-miR-17-5p	gga_circ_0005177	154	-15.14	154	-15.14	114957	24	564	330
gga-miR-17-5p	gga_circ_0005508	165	-13.89	165	-13.89	115085	24	309	47
gga-miR-17-5p	gga_circ_0005509	165	-13.89	165	-13.89	115087	24	386	124
gga-miR-17-5p	gga_circ_0005510	165	-13.89	165	-13.89	115089	24	389	127
gga-miR-17-5p	gga_circ_0005511	165	-13.89	165	-13.89	115091	24	563	301
gga-miR-17-5p	gga_circ_0005513	165	-13.89	165	-13.89	115093	24	280	127
gga-miR-17-5p	gga_circ_0005521	152	-11.73	152	-11.73	115095	24	341	188
gga-miR-17-5p	gga_circ_0005791	145	-15.1	145	-15.1	115223	24	450	238
gga-miR-17-5p	gga_circ_0005818	174	-18.11	174	-18.11	115231	24	234	152
gga-miR-17-5p	gga_circ_0005903	152	-11.63	152	-11.63	115273	24	270	1
gga-miR-17-5p	gga_circ_0005926	147	-19.91	147	-19.91	115285	24	465	149
gga-miR-17-5p	gga_circ_0005995	157	-12.59	157	-12.59	115325	24	169	27
gga-miR-17-5p	gga_circ_0006089	161	-20.13	161	-20.13	115355	24	356	116
gga-miR-17-5p	gga_circ_0004007	155	-13.16	155	-13.16	115471	24	333	45
gga-miR-17-5p	gga_circ_0004128	149	-19.4	149	-19.4	115525	24	377	80
gga-miR-17-5p	gga_circ_0004150	144	-14.72	144	-14.72	115533	24	270	128
gga-miR-17-5p	gga_circ_0004151	144	-14.72	144	-14.72	115535	24	357	215
gga-miR-17-5p	gga_circ_0004529	159	-23.37	159	-23.37	115667	24	293	126
gga-miR-17-5p	gga_circ_0004557	154	-13.94	154	-13.94	115689	24	537	175
gga-miR-17-5p	gga_circ_0004578	152	-14.42	152	-14.42	115695	24	357	87
gga-miR-17-5p	gga_circ_0004631	150	-11.09	150	-11.09	115717	24	257	129
gga-miR-17-5p	gga_circ_0004636	148	-16.64	148	-16.64	115719	24	611	585
gga-miR-17-5p	gga_circ_0004830	154	-19.01	154	-19.01	115789	24	527	490
gga-miR-17-5p	gga_circ_0001818	160	-18.32	160	-18.32	115955	24	227	47
gga-miR-17-5p	gga_circ_0001819	160	-18.32	160	-18.32	115957	24	506	47
gga-miR-17-5p	gga_circ_0001923	148	-16.57	148	-16.57	115999	24	491	459
gga-miR-17-5p	gga_circ_0001984	154	-15.57	154	-15.57	116015	24	349	184
gga-miR-17-5p	gga_circ_0002155	152	-11.73	152	-11.73	116079	24	337	15
gga-miR-17-5p	gga_circ_0002157	152	-22.39	152	-22.39	116083	24	396	119
gga-miR-17-5p	gga_circ_0002168	152	-16.16	152	-16.16	116093	24	690	607
gga-miR-17-5p	gga_circ_0002385	157	-12.23	157	-12.23	116161	24	702	14
gga-miR-17-5p	gga_circ_0002388	150	-14.7	150	-14.7	116165	24	326	28
gga-miR-17-5p	gga_circ_0002513	153	-15.37	153	-15.37	116217	24	504	114
gga-miR-17-5p	gga_circ_0002515	153	-15.37	153	-15.37	116219	24	299	114
gga-miR-17-5p	gga_circ_0002517	153	-15.37	153	-15.37	116221	24	228	114
gga-miR-17-5p	gga_circ_0002520	167	-20.85	167	-20.85	116223	24	206	85
gga-miR-17-5p	gga_circ_0002521	167	-20.85	167	-20.85	116225	24	300	179
gga-miR-17-5p	gga_circ_0002583	150	-13.46	150	-13.46	116261	24	326	295
gga-miR-17-5p	gga_circ_0002588	152	-17.35	152	-17.35	116263	24	410	270
gga-miR-17-5p	gga_circ_0003274	140	-14.42	140	-14.42	116519	24	516	52
gga-miR-17-5p	gga_circ_0008666	157	-12.45	157	-12.45	116589	24	304	169
gga-miR-17-5p	gga_circ_0008667	157	-12.45	157	-12.45	116591	24	317	169
gga-miR-17-3p	gga_circ_0000848	163	-22.75	163	-22.75	116651	20	1384	354
gga-miR-17-3p	gga_circ_0000870	154	-17.14	154	-17.14	116657	20	303	3
gga-miR-17-3p	gga_circ_0000906	147	-17.77	147	-17.77	116673	20	360	183
gga-miR-17-3p	gga_circ_0000284	430	-45.91	145	-18.61	116767	20	539	401 330 468
gga-miR-17-3p	gga_circ_0000377	145	-15.44	145	-15.44	116815	20	583	370
gga-miR-17-3p	gga_circ_0001243	140	-15.35	140	-15.35	116827	20	290	259
gga-miR-17-3p	gga_circ_0001320	145	-14.87	145	-14.87	116859	20	233	203
gga-miR-17-3p	gga_circ_0001326	140	-14.56	140	-14.56	116863	20	283	57
gga-miR-17-3p	gga_circ_0001194	155	-16.05	155	-16.05	116869	20	234	102
gga-miR-17-3p	gga_circ_0001101	145	-15.67	145	-15.67	116883	20	377	333
gga-miR-17-3p	gga_circ_0001102	285	-28.09	145	-15.67	116885	20	302	114 182
gga-miR-17-3p	gga_circ_0001156	140	-13.46	140	-13.46	116907	20	312	144
gga-miR-17-3p	gga_circ_0001042	157	-20.05	157	-20.05	116965	20	233	53
gga-miR-17-3p	gga_circ_0008796	141	-14.11	141	-14.11	116995	20	339	202
gga-miR-17-3p	gga_circ_0008798	141	-14.11	141	-14.11	116999	20	494	357
gga-miR-17-3p	gga_circ_0008802	141	-14.11	141	-14.11	117001	20	681	602
gga-miR-17-3p	gga_circ_0008828	154	-16.18	154	-16.18	117009	20	490	263
gga-miR-17-3p	gga_circ_0008920	147	-16.86	147	-16.86	117041	20	329	185
gga-miR-17-3p	gga_circ_0008933	148	-17.15	148	-17.15	117047	20	395	46
gga-miR-17-3p	gga_circ_0009005	153	-15.42	153	-15.42	117073	20	184	39
gga-miR-17-3p	gga_circ_0009090	289	-31.41	149	-17.21	117109	20	441	58 1
gga-miR-17-3p	gga_circ_0009164	140	-12.57	140	-12.57	117129	20	375	340
gga-miR-17-3p	gga_circ_0000637	140	-12.31	140	-12.31	117163	20	593	393
gga-miR-17-3p	gga_circ_0000655	145	-14.66	145	-14.66	117169	20	454	311
gga-miR-17-3p	gga_circ_0000759	140	-12.5	140	-12.5	117205	20	317	193
gga-miR-17-3p	gga_circ_0000158	145	-18.21	145	-18.21	117225	20	283	30
gga-miR-17-3p	gga_circ_0001506	170	-24.02	170	-24.02	117275	20	313	258
gga-miR-17-3p	gga_circ_0008192	142	-15.96	142	-15.96	117319	20	468	429
gga-miR-17-3p	gga_circ_0008458	152	-15.24	152	-15.24	117403	20	336	65
gga-miR-17-3p	gga_circ_0008495	152	-18.2	152	-18.2	117429	20	530	380
gga-miR-17-3p	gga_circ_0008502	145	-16.05	145	-16.05	117433	20	443	37
gga-miR-17-3p	gga_circ_0003485	140	-12.37	140	-12.37	117469	20	254	1
gga-miR-17-3p	gga_circ_0003491	145	-17.68	145	-17.68	117471	20	597	194
gga-miR-17-3p	gga_circ_0003493	145	-19.2	145	-19.2	117473	20	413	194
gga-miR-17-3p	gga_circ_0007473	146	-19.36	146	-19.36	117527	20	402	146
gga-miR-17-3p	gga_circ_0007509	155	-18.67	155	-18.67	117541	20	398	58
gga-miR-17-3p	gga_circ_0007653	140	-12.82	140	-12.82	117579	20	402	167
gga-miR-17-3p	gga_circ_0007686	147	-16.79	147	-16.79	117591	20	593	575
gga-miR-17-3p	gga_circ_0007687	147	-16.79	147	-16.79	117593	20	287	269
gga-miR-17-3p	gga_circ_0007727	145	-17.25	145	-17.25	117609	20	203	21
gga-miR-17-3p	gga_circ_0007732	143	-12.49	143	-12.49	117613	20	86	1
gga-miR-17-3p	gga_circ_0007770	148	-13.7	148	-13.7	117625	20	592	24
gga-miR-17-3p	gga_circ_0007771	148	-13.7	148	-13.7	117627	20	256	69
gga-miR-17-3p	gga_circ_0007772	148	-13.7	148	-13.7	117629	20	366	179
gga-miR-17-3p	gga_circ_0007776	148	-13.7	148	-13.7	117631	20	283	24
gga-miR-17-3p	gga_circ_0006232	149	-17.5	149	-17.5	117675	20	105	68
gga-miR-17-3p	gga_circ_0006587	140	-12.59	140	-12.59	117793	20	540	522
gga-miR-17-3p	gga_circ_0006611	140	-12.61	140	-12.61	117809	20	291	128
gga-miR-17-3p	gga_circ_0006733	147	-18.36	147	-18.36	117849	20	370	242
gga-miR-17-3p	gga_circ_0003668	154	-19.94	154	-19.94	117927	20	356	56
gga-miR-17-3p	gga_circ_0003698	145	-15.68	145	-15.68	117949	20	285	233
gga-miR-17-3p	gga_circ_0003510	140	-12.94	140	-12.94	117971	20	538	496
gga-miR-17-3p	gga_circ_0003594	140	-13.33	140	-13.33	117995	20	323	173
gga-miR-17-3p	gga_circ_0003408	145	-14.58	145	-14.58	118023	20	449	321
gga-miR-17-3p	gga_circ_0003760	150	-17.32	150	-17.32	118043	20	462	94
gga-miR-17-3p	gga_circ_0006832	152	-19.08	152	-19.08	118207	20	217	53
gga-miR-17-3p	gga_circ_0006834	152	-19.08	152	-19.08	118209	20	391	53
gga-miR-17-3p	gga_circ_0006870	143	-16.39	143	-16.39	118217	20	243	128
gga-miR-17-3p	gga_circ_0006924	145	-15.09	145	-15.09	118231	20	346	217
gga-miR-17-3p	gga_circ_0006937	150	-18.38	150	-18.38	118237	20	463	47
gga-miR-17-3p	gga_circ_0006938	149	-17.18	149	-17.18	118239	20	492	379
gga-miR-17-3p	gga_circ_0007170	140	-13.78	140	-13.78	118323	20	520	22
gga-miR-17-3p	gga_circ_0007233	145	-15.93	145	-15.93	118355	20	539	461
gga-miR-17-3p	gga_circ_0007234	141	-14.2	141	-14.2	118357	20	223	147
gga-miR-17-3p	gga_circ_0007235	141	-14.2	141	-14.2	118359	20	317	147
gga-miR-17-3p	gga_circ_0007246	140	-13.64	140	-13.64	118363	20	440	69
gga-miR-17-3p	gga_circ_0007297	145	-16.67	145	-16.67	118383	20	278	156
gga-miR-17-3p	gga_circ_0007298	145	-16.67	145	-16.67	118385	20	473	351
gga-miR-17-3p	gga_circ_0007358	140	-16.55	140	-16.55	118401	20	410	347
gga-miR-17-3p	gga_circ_0005144	295	-33.52	150	-17.47	118465	20	564	376 500
gga-miR-17-3p	gga_circ_0005179	146	-14.28	146	-14.28	118493	20	270	172
gga-miR-17-3p	gga_circ_0005265	141	-15.56	141	-15.56	118535	20	350	18
gga-miR-17-3p	gga_circ_0005344	140	-10.94	140	-10.94	118557	20	384	226
gga-miR-17-3p	gga_circ_0005353	149	-17.06	149	-17.06	118561	20	754	306
gga-miR-17-3p	gga_circ_0005501	146	-15.37	146	-15.37	118615	20	364	246
gga-miR-17-3p	gga_circ_0005606	140	-15.44	140	-15.44	118675	20	270	8
gga-miR-17-3p	gga_circ_0005612	146	-13.59	146	-13.59	118677	20	158	66
gga-miR-17-3p	gga_circ_0005665	151	-16.32	151	-16.32	118697	20	183	126
gga-miR-17-3p	gga_circ_0005666	151	-16.32	151	-16.32	118699	20	360	303
gga-miR-17-3p	gga_circ_0005875	141	-12.49	141	-12.49	118799	20	255	1
gga-miR-17-3p	gga_circ_0006120	140	-13.54	140	-13.54	118905	20	320	105
gga-miR-17-3p	gga_circ_0003833	140	-16.23	140	-16.23	118927	20	502	96
gga-miR-17-3p	gga_circ_0003850	140	-13.99	140	-13.99	118931	20	567	199
gga-miR-17-3p	gga_circ_0003916	141	-14.22	141	-14.22	118957	20	564	212
gga-miR-17-3p	gga_circ_0003944	149	-14.3	149	-14.3	118971	20	367	245
gga-miR-17-3p	gga_circ_0003962	148	-14.63	148	-14.63	118975	20	175	117
gga-miR-17-3p	gga_circ_0004013	144	-13.44	144	-13.44	119011	20	309	53
gga-miR-17-3p	gga_circ_0004058	140	-13.04	140	-13.04	119033	20	464	6
gga-miR-17-3p	gga_circ_0004060	140	-13.04	140	-13.04	119035	20	505	6
gga-miR-17-3p	gga_circ_0004071	150	-18.56	150	-18.56	119039	20	323	141
gga-miR-17-3p	gga_circ_0004128	147	-21.58	147	-21.58	119059	20	377	73
gga-miR-17-3p	gga_circ_0004223	152	-14.96	152	-14.96	119091	20	645	157
gga-miR-17-3p	gga_circ_0004248	144	-14.49	144	-14.49	119099	20	390	171
gga-miR-17-3p	gga_circ_0004319	156	-16.85	156	-16.85	119121	20	407	283
gga-miR-17-3p	gga_circ_0004320	156	-16.85	156	-16.85	119123	20	321	283
gga-miR-17-3p	gga_circ_0004396	157	-23.44	157	-23.44	119149	20	532	215
gga-miR-17-3p	gga_circ_0004402	157	-23.44	157	-23.44	119151	20	449	215
gga-miR-17-3p	gga_circ_0004453	140	-14.18	140	-14.18	119175	20	173	117
gga-miR-17-3p	gga_circ_0004473	140	-16.23	140	-16.23	119181	20	391	24
gga-miR-17-3p	gga_circ_0004529	152	-19.26	152	-19.26	119201	20	293	247
gga-miR-17-3p	gga_circ_0004555	154	-17.27	154	-17.27	119221	20	264	210
gga-miR-17-3p	gga_circ_0004830	140	-12.91	140	-12.91	119323	20	527	487
gga-miR-17-3p	gga_circ_0004853	142	-13.76	142	-13.76	119333	20	290	58
gga-miR-17-3p	gga_circ_0004886	142	-13.59	142	-13.59	119343	20	461	141
gga-miR-17-3p	gga_circ_0004890	142	-13.59	142	-13.59	119345	20	405	85
gga-miR-17-3p	gga_circ_0004897	160	-23.89	160	-23.89	119347	20	347	92
gga-miR-17-3p	gga_circ_0004956	145	-15.81	145	-15.81	119375	20	413	305
gga-miR-17-3p	gga_circ_0001568	145	-16.2	145	-16.2	119407	20	368	335
gga-miR-17-3p	gga_circ_0001605	155	-18.42	155	-18.42	119419	20	423	286
gga-miR-17-3p	gga_circ_0001623	148	-24.11	148	-24.11	119425	20	1248	383
gga-miR-17-3p	gga_circ_0001950	142	-15.36	142	-15.36	119535	20	305	67
gga-miR-17-3p	gga_circ_0001974	141	-17.11	141	-17.11	119547	20	219	9
gga-miR-17-3p	gga_circ_0002013	144	-15.52	144	-15.52	119565	20	182	23
gga-miR-17-3p	gga_circ_0002104	143	-17.55	143	-17.55	119589	20	312	56
gga-miR-17-3p	gga_circ_0002105	153	-20.7	153	-20.7	119591	20	693	469
gga-miR-17-3p	gga_circ_0002393	145	-17.81	145	-17.81	119701	20	184	21
gga-miR-17-3p	gga_circ_0002415	147	-14.95	147	-14.95	119715	20	339	262
gga-miR-17-3p	gga_circ_0002513	140	-12.26	140	-12.26	119751	20	504	59
gga-miR-17-3p	gga_circ_0002515	140	-12.26	140	-12.26	119753	20	299	59
gga-miR-17-3p	gga_circ_0002517	140	-12.26	140	-12.26	119755	20	228	59
gga-miR-17-3p	gga_circ_0002895	146	-14.76	146	-14.76	119905	20	623	191
gga-miR-17-3p	gga_circ_0002897	146	-14.76	146	-14.76	119907	20	643	191
gga-miR-17-3p	gga_circ_0002935	149	-17.74	149	-17.74	119919	20	293	55
gga-miR-17-3p	gga_circ_0003143	152	-18.22	152	-18.22	120013	20	610	252
gga-miR-17-3p	gga_circ_0008670	150	-22.19	150	-22.19	120127	20	284	13
gga-miR-16-5p	gga_circ_0000791	143	-17.26	143	-17.26	120163	22	267	84
gga-miR-16-5p	gga_circ_0000848	149	-17.43	149	-17.43	120185	22	1384	1082
gga-miR-16-5p	gga_circ_0000916	141	-12.99	141	-12.99	120209	22	415	280
gga-miR-16-5p	gga_circ_0000446	287	-30.11	147	-15.2	120217	22	454	197 1
gga-miR-16-5p	gga_circ_0000449	147	-16.63	147	-16.63	120219	22	452	299
gga-miR-16-5p	gga_circ_0000491	156	-16.98	156	-16.98	120231	22	303	9
gga-miR-16-5p	gga_circ_0000229	163	-14.49	163	-14.49	120277	22	466	339
gga-miR-16-5p	gga_circ_0000242	154	-14.97	154	-14.97	120283	22	546	146
gga-miR-16-5p	gga_circ_0000352	145	-13.95	145	-13.95	120331	22	300	1
gga-miR-16-5p	gga_circ_0001106	143	-12.63	143	-12.63	120421	22	373	331
gga-miR-16-5p	gga_circ_0001110	143	-12.63	143	-12.63	120425	22	743	331
gga-miR-16-5p	gga_circ_0001111	143	-12.63	143	-12.63	120427	22	612	331
gga-miR-16-5p	gga_circ_0001182	149	-16.74	149	-16.74	120451	22	485	389
gga-miR-16-5p	gga_circ_0001183	149	-16.74	149	-16.74	120453	22	401	305
gga-miR-16-5p	gga_circ_0008802	142	-15.29	142	-15.29	120535	22	681	231
gga-miR-16-5p	gga_circ_0008862	147	-16.79	147	-16.79	120551	22	321	38
gga-miR-16-5p	gga_circ_0008926	158	-18.31	158	-18.31	120577	22	409	1
gga-miR-16-5p	gga_circ_0008933	144	-15.4	144	-15.4	120581	22	395	336
gga-miR-16-5p	gga_circ_0008944	146	-21.81	146	-21.81	120587	22	451	180
gga-miR-16-5p	gga_circ_0009081	294	-32.12	154	-16.45	120639	22	387	21 87
gga-miR-16-5p	gga_circ_0009181	159	-17.46	159	-17.46	120675	22	361	166
gga-miR-16-5p	gga_circ_0000644	141	-13.73	141	-13.73	120699	22	501	99
gga-miR-16-5p	gga_circ_0000731	145	-13.25	145	-13.25	120727	22	282	66
gga-miR-16-5p	gga_circ_0001406	290	-30.16	146	-15.56	120781	22	1213	1121 809
gga-miR-16-5p	gga_circ_0000189	147	-21.42	147	-21.42	120787	22	458	152
gga-miR-16-5p	gga_circ_0008295	145	-17.69	145	-17.69	120885	22	290	138
gga-miR-16-5p	gga_circ_0008467	145	-17.16	145	-17.16	120945	22	363	92
gga-miR-16-5p	gga_circ_0003440	153	-13.95	153	-13.95	120983	22	308	228
gga-miR-16-5p	gga_circ_0007374	142	-18.52	142	-18.52	121021	22	185	52
gga-miR-16-5p	gga_circ_0007408	148	-17.55	148	-17.55	121031	22	282	183
gga-miR-16-5p	gga_circ_0007423	142	-11.14	142	-11.14	121039	22	258	163
gga-miR-16-5p	gga_circ_0007527	148	-15.43	148	-15.43	121081	22	382	63
gga-miR-16-5p	gga_circ_0007578	150	-16.85	150	-16.85	121091	22	327	273
gga-miR-16-5p	gga_circ_0007635	147	-16.88	147	-16.88	121109	22	240	115
gga-miR-16-5p	gga_circ_0007680	293	-28.17	152	-14.1	121119	22	424	16 290
gga-miR-16-5p	gga_circ_0007682	141	-14.1	141	-14.1	121121	22	314	180
gga-miR-16-5p	gga_circ_0006189	142	-12.21	142	-12.21	121185	22	331	164
gga-miR-16-5p	gga_circ_0006233	142	-12.64	142	-12.64	121211	22	362	259
gga-miR-16-5p	gga_circ_0006376	150	-12.9	150	-12.9	121255	22	415	377
gga-miR-16-5p	gga_circ_0006401	151	-18.71	151	-18.71	121267	22	482	80
gga-miR-16-5p	gga_circ_0006536	140	-11.14	140	-11.14	121315	22	459	273
gga-miR-16-5p	gga_circ_0006655	142	-14.17	142	-14.17	121365	22	310	120
gga-miR-16-5p	gga_circ_0006707	152	-11.71	152	-11.71	121375	22	368	1
gga-miR-16-5p	gga_circ_0006772	144	-12.8	144	-12.8	121393	22	251	110
gga-miR-16-5p	gga_circ_0006773	144	-12.8	144	-12.8	121395	22	302	161
gga-miR-16-5p	gga_circ_0006774	144	-12.8	144	-12.8	121397	22	461	320
gga-miR-16-5p	gga_circ_0006775	144	-12.8	144	-12.8	121399	22	544	403
gga-miR-16-5p	gga_circ_0006820	145	-12.78	145	-12.78	121417	22	328	240
gga-miR-16-5p	gga_circ_0006822	145	-12.78	145	-12.78	121419	22	292	24
gga-miR-16-5p	gga_circ_0008721	152	-15.02	152	-15.02	121445	22	625	504
gga-miR-16-5p	gga_circ_0003696	158	-18.73	158	-18.73	121481	22	227	205
gga-miR-16-5p	gga_circ_0003720	140	-10.53	140	-10.53	121489	22	442	342
gga-miR-16-5p	gga_circ_0003605	148	-13.69	148	-13.69	121493	22	83	1
gga-miR-16-5p	gga_circ_0003636	144	-13.58	144	-13.58	121501	22	539	236
gga-miR-16-5p	gga_circ_0003329	145	-12.54	145	-12.54	121535	22	351	1
gga-miR-16-5p	gga_circ_0003754	142	-17.58	142	-17.58	121573	22	412	1
gga-miR-16-5p	gga_circ_0003758	147	-15.73	147	-15.73	121575	22	489	278
gga-miR-16-5p	gga_circ_0003764	143	-12.73	143	-12.73	121579	22	252	177
gga-miR-16-5p	gga_circ_0007869	143	-15.35	143	-15.35	121623	22	463	250
gga-miR-16-5p	gga_circ_0007965	157	-16.04	157	-16.04	121657	22	296	251
gga-miR-16-5p	gga_circ_0008100	156	-20.21	156	-20.21	121711	22	350	270
gga-miR-16-5p	gga_circ_0008117	153	-16.17	153	-16.17	121717	22	363	32
gga-miR-16-5p	gga_circ_0006853	149	-15.55	149	-15.55	121745	22	693	175
gga-miR-16-5p	gga_circ_0006890	144	-13.29	144	-13.29	121753	22	569	3
gga-miR-16-5p	gga_circ_0006924	146	-20.75	146	-20.75	121765	22	346	176
gga-miR-16-5p	gga_circ_0007006	143	-17.41	143	-17.41	121807	22	525	485
gga-miR-16-5p	gga_circ_0007079	141	-13.09	141	-13.09	121829	22	408	17
gga-miR-16-5p	gga_circ_0007111	155	-19.65	155	-19.65	121839	22	283	252
gga-miR-16-5p	gga_circ_0007290	141	-12.83	141	-12.83	121915	22	461	8
gga-miR-16-5p	gga_circ_0007369	148	-11.4	148	-11.4	121941	22	368	100
gga-miR-16-5p	gga_circ_0005098	146	-18.06	146	-18.06	121979	22	402	261
gga-miR-16-5p	gga_circ_0005108	142	-16.9	142	-16.9	121987	22	413	127
gga-miR-16-5p	gga_circ_0005250	154	-16.53	154	-16.53	122063	22	306	161
gga-miR-16-5p	gga_circ_0005405	156	-15.36	156	-15.36	122111	22	347	53
gga-miR-16-5p	gga_circ_0005416	151	-15.46	151	-15.46	122123	22	544	189
gga-miR-16-5p	gga_circ_0005502	140	-12.96	140	-12.96	122151	22	352	38
gga-miR-16-5p	gga_circ_0005508	140	-12.96	140	-12.96	122153	22	309	238
gga-miR-16-5p	gga_circ_0005509	140	-12.96	140	-12.96	122155	22	386	315
gga-miR-16-5p	gga_circ_0005510	140	-12.96	140	-12.96	122157	22	389	318
gga-miR-16-5p	gga_circ_0005511	140	-12.96	140	-12.96	122159	22	563	492
gga-miR-16-5p	gga_circ_0005566	150	-15.83	150	-15.83	122189	22	308	284
gga-miR-16-5p	gga_circ_0005649	153	-16.18	153	-16.18	122225	22	555	471
gga-miR-16-5p	gga_circ_0005720	150	-15.82	150	-15.82	122259	22	291	155
gga-miR-16-5p	gga_circ_0005738	147	-15.16	147	-15.16	122273	22	285	5
gga-miR-16-5p	gga_circ_0005875	154	-17.15	154	-17.15	122333	22	255	47
gga-miR-16-5p	gga_circ_0003850	303	-42.09	158	-21.12	122465	22	567	221 77
gga-miR-16-5p	gga_circ_0003882	147	-16.21	147	-16.21	122475	22	204	75
gga-miR-16-5p	gga_circ_0003940	147	-18.69	147	-18.69	122499	22	296	67
gga-miR-16-5p	gga_circ_0003944	142	-17.86	142	-17.86	122505	22	367	29
gga-miR-16-5p	gga_circ_0004016	161	-16.35	161	-16.35	122549	22	478	263
gga-miR-16-5p	gga_circ_0004019	161	-16.35	161	-16.35	122551	22	315	263
gga-miR-16-5p	gga_circ_0004060	155	-13.86	155	-13.86	122569	22	505	472
gga-miR-16-5p	gga_circ_0004200	156	-14.75	156	-14.75	122617	22	247	40
gga-miR-16-5p	gga_circ_0004248	151	-18.32	151	-18.32	122633	22	390	40
gga-miR-16-5p	gga_circ_0004412	141	-16.47	141	-16.47	122689	22	478	80
gga-miR-16-5p	gga_circ_0004448	145	-13.57	145	-13.57	122703	22	452	379
gga-miR-16-5p	gga_circ_0004494	149	-16.75	149	-16.75	122717	22	231	57
gga-miR-16-5p	gga_circ_0004533	144	-17.81	144	-17.81	122737	22	290	48
gga-miR-16-5p	gga_circ_0004541	140	-15.55	140	-15.55	122741	22	484	163
gga-miR-16-5p	gga_circ_0004542	140	-15.55	140	-15.55	122743	22	588	267
gga-miR-16-5p	gga_circ_0004543	140	-15.55	140	-15.55	122745	22	337	163
gga-miR-16-5p	gga_circ_0004544	140	-15.55	140	-15.55	122747	22	518	344
gga-miR-16-5p	gga_circ_0004545	140	-15.55	140	-15.55	122749	22	520	346
gga-miR-16-5p	gga_circ_0004546	140	-15.55	140	-15.55	122751	22	370	267
gga-miR-16-5p	gga_circ_0004764	163	-24.12	163	-24.12	122815	22	304	226
gga-miR-16-5p	gga_circ_0004774	143	-14.58	143	-14.58	122819	22	316	229
gga-miR-16-5p	gga_circ_0004779	153	-15.18	153	-15.18	122825	22	263	170
gga-miR-16-5p	gga_circ_0004829	153	-16.91	153	-16.91	122855	22	262	229
gga-miR-16-5p	gga_circ_0004886	141	-14.42	141	-14.42	122877	22	461	277
gga-miR-16-5p	gga_circ_0004890	141	-14.42	141	-14.42	122879	22	405	221
gga-miR-16-5p	gga_circ_0004903	305	-28.18	154	-14.42	122883	22	328	236 86
gga-miR-16-5p	gga_circ_0004906	151	-14.42	151	-14.42	122885	22	118	86
gga-miR-16-5p	gga_circ_0004953	151	-18.1	151	-18.1	122907	22	319	252
gga-miR-16-5p	gga_circ_0004990	148	-13.73	148	-13.73	122917	22	603	9
gga-miR-16-5p	gga_circ_0002242	160	-20.24	160	-20.24	123181	22	604	245
gga-miR-16-5p	gga_circ_0002289	143	-12.65	143	-12.65	123201	22	327	256
gga-miR-16-5p	gga_circ_0002323	142	-15.24	142	-15.24	123209	22	370	115
gga-miR-16-5p	gga_circ_0002440	162	-19.77	162	-19.77	123255	22	386	78
gga-miR-16-5p	gga_circ_0002441	162	-19.77	162	-19.77	123257	22	428	107
gga-miR-16-5p	gga_circ_0002454	154	-16.72	154	-16.72	123259	22	221	158
gga-miR-16-5p	gga_circ_0002521	154	-17.85	154	-17.85	123293	22	300	42
gga-miR-16-5p	gga_circ_0002538	145	-17.52	145	-17.52	123309	22	531	177
gga-miR-16-5p	gga_circ_0002615	154	-19.97	154	-19.97	123341	22	400	255
gga-miR-16-5p	gga_circ_0002741	145	-16.11	145	-16.11	123389	22	336	54
gga-miR-16-5p	gga_circ_0002838	140	-14	140	-14	123425	22	357	64
gga-miR-16-5p	gga_circ_0002917	153	-13.18	153	-13.18	123445	22	621	300
gga-miR-16-5p	gga_circ_0002922	153	-13.18	153	-13.18	123449	22	369	48
gga-miR-16-5p	gga_circ_0002967	142	-16.07	142	-16.07	123465	22	338	79
gga-miR-16-5p	gga_circ_0002999	153	-12.79	153	-12.79	123475	22	491	26
gga-miR-16-5p	gga_circ_0003004	145	-17.48	145	-17.48	123481	22	350	207
gga-miR-16-5p	gga_circ_0003050	147	-11.29	147	-11.29	123499	22	549	406
gga-miR-16-5p	gga_circ_0003106	165	-21.69	165	-21.69	123527	22	828	678
gga-miR-16-5p	gga_circ_0003228	143	-15.3	143	-15.3	123573	22	415	31
gga-miR-16-5p	gga_circ_0008546	144	-14.84	144	-14.84	123619	22	519	443
gga-miR-16-5p	gga_circ_0008553	143	-15	143	-15	123621	22	332	242
gga-miR-16-5p	gga_circ_0008571	140	-11.91	140	-11.91	123629	22	390	111
gga-miR-16-5p	gga_circ_0008615	141	-16.76	141	-16.76	123641	22	372	318
gga-miR-16-5p	gga_circ_0000154	150	-20.74	150	-20.74	123679	22	264	8
gga-miR-16-1-3p	gga_circ_0008792	308	-34.33	155	-18.32	124061	23	354	291 148
gga-miR-16-1-3p	gga_circ_0008823	159	-15.08	159	-15.08	124075	23	406	199
gga-miR-16-1-3p	gga_circ_0000731	155	-23.2	155	-23.2	124261	23	282	232
gga-miR-16-1-3p	gga_circ_0000733	158	-16.83	158	-16.83	124263	23	283	174
gga-miR-16-1-3p	gga_circ_0008192	158	-13.23	158	-13.23	124387	23	468	437
gga-miR-16-1-3p	gga_circ_0008458	147	-15.94	147	-15.94	124471	23	336	45
gga-miR-16-1-3p	gga_circ_0007499	155	-18.42	155	-18.42	124603	23	685	409
gga-miR-16-1-3p	gga_circ_0007736	148	-14.5	148	-14.5	124683	23	287	174
gga-miR-16-1-3p	gga_circ_0006204	143	-11.05	143	-11.05	124721	23	377	75
gga-miR-16-1-3p	gga_circ_0006401	161	-15.99	161	-15.99	124801	23	482	322
gga-miR-16-1-3p	gga_circ_0006429	144	-19.22	144	-19.22	124813	23	405	63
gga-miR-16-1-3p	gga_circ_0006598	158	-17.33	158	-17.33	124869	23	619	322
gga-miR-16-1-3p	gga_circ_0006643	145	-11.63	145	-11.63	124891	23	182	139
gga-miR-16-1-3p	gga_circ_0006767	162	-16.49	162	-16.49	124923	23	189	18
gga-miR-16-1-3p	gga_circ_0006768	162	-16.49	162	-16.49	124925	23	454	101
gga-miR-16-1-3p	gga_circ_0006774	162	-16.49	162	-16.49	124931	23	461	18
gga-miR-16-1-3p	gga_circ_0006775	162	-16.49	162	-16.49	124933	23	544	101
gga-miR-16-1-3p	gga_circ_0006779	162	-16.49	162	-16.49	124935	23	314	18
gga-miR-16-1-3p	gga_circ_0006780	162	-16.49	162	-16.49	124937	23	397	101
gga-miR-16-1-3p	gga_circ_0003776	147	-10.61	147	-10.61	125121	23	552	67
gga-miR-16-1-3p	gga_circ_0007966	146	-12.72	146	-12.72	125193	23	332	270
gga-miR-16-1-3p	gga_circ_0007182	140	-10.78	140	-10.78	125393	23	297	18
gga-miR-16-1-3p	gga_circ_0007200	149	-11.31	149	-11.31	125403	23	425	373
gga-miR-16-1-3p	gga_circ_0007210	155	-17.93	155	-17.93	125413	23	683	564
gga-miR-16-1-3p	gga_circ_0005060	150	-16.77	150	-16.77	125489	23	314	87
gga-miR-16-1-3p	gga_circ_0005066	150	-16.77	150	-16.77	125495	23	377	74
gga-miR-16-1-3p	gga_circ_0005067	150	-16.77	150	-16.77	125497	23	711	87
gga-miR-16-1-3p	gga_circ_0005084	148	-17.51	148	-17.51	125509	23	361	179
gga-miR-16-1-3p	gga_circ_0005265	150	-18.43	150	-18.43	125603	23	350	315
gga-miR-16-1-3p	gga_circ_0005492	143	-18.16	143	-18.16	125677	23	426	275
gga-miR-16-1-3p	gga_circ_0005496	143	-18.16	143	-18.16	125679	23	318	167
gga-miR-16-1-3p	gga_circ_0005649	146	-12.45	146	-12.45	125759	23	555	129
gga-miR-16-1-3p	gga_circ_0005716	148	-14.12	148	-14.12	125791	23	359	323
gga-miR-16-1-3p	gga_circ_0005733	151	-15.63	151	-15.63	125801	23	320	231
gga-miR-16-1-3p	gga_circ_0003796	162	-14.26	162	-14.26	125977	23	426	114
gga-miR-16-1-3p	gga_circ_0004007	156	-16.51	156	-16.51	126073	23	333	168
gga-miR-16-1-3p	gga_circ_0004008	156	-16.51	156	-16.51	126075	23	378	213
gga-miR-16-1-3p	gga_circ_0004060	148	-13.44	148	-13.44	126103	23	505	301
gga-miR-16-1-3p	gga_circ_0004115	151	-18.63	151	-18.63	126123	23	626	138
gga-miR-16-1-3p	gga_circ_0004152	140	-11.02	140	-11.02	126139	23	337	1
gga-miR-16-1-3p	gga_circ_0004853	148	-18	148	-18	126401	23	290	208
gga-miR-16-1-3p	gga_circ_0001853	146	-15	146	-15	126577	23	306	1
gga-miR-16-1-3p	gga_circ_0001963	141	-10.1	141	-10.1	126611	23	535	360
gga-miR-16-1-3p	gga_circ_0002308	161	-16.25	161	-16.25	126741	23	479	87
gga-miR-16-1-3p	gga_circ_0002948	151	-17.51	151	-17.51	126991	23	355	115
gga-miR-16-1-3p	gga_circ_0003261	149	-16.14	149	-16.14	127117	23	522	441
gga-miR-16-1-3p	gga_circ_0008613	158	-21.27	158	-21.27	127171	23	412	322
gga-miR-16-1-3p	gga_circ_0008674	154	-18.93	154	-18.93	127199	23	292	133
gga-miR-15a	gga_circ_0000791	145	-13.09	145	-13.09	127231	21	267	84
gga-miR-15a	gga_circ_0000848	148	-13.26	148	-13.26	127253	21	1384	1086
gga-miR-15a	gga_circ_0000916	140	-11.82	140	-11.82	127277	21	415	280
gga-miR-15a	gga_circ_0000446	285	-30.45	143	-15.8	127285	21	454	1 198
gga-miR-15a	gga_circ_0000449	150	-18.29	150	-18.29	127287	21	452	301
gga-miR-15a	gga_circ_0000491	149	-15.78	149	-15.78	127299	21	303	11
gga-miR-15a	gga_circ_0000229	150	-13.28	150	-13.28	127345	21	466	339
gga-miR-15a	gga_circ_0000242	153	-14.46	153	-14.46	127351	21	546	146
gga-miR-15a	gga_circ_0000352	145	-14.32	145	-14.32	127399	21	300	1
gga-miR-15a	gga_circ_0001106	158	-18.5	158	-18.5	127489	21	373	330
gga-miR-15a	gga_circ_0001110	158	-18.5	158	-18.5	127493	21	743	330
gga-miR-15a	gga_circ_0001111	158	-18.5	158	-18.5	127495	21	612	330
gga-miR-15a	gga_circ_0001182	143	-17.19	143	-17.19	127519	21	485	390
gga-miR-15a	gga_circ_0001183	143	-17.19	143	-17.19	127521	21	401	306
gga-miR-15a	gga_circ_0008802	144	-15.4	144	-15.4	127603	21	681	231
gga-miR-15a	gga_circ_0008862	148	-16.22	148	-16.22	127619	21	321	40
gga-miR-15a	gga_circ_0008926	156	-16.62	156	-16.62	127645	21	409	1
gga-miR-15a	gga_circ_0008933	143	-14.03	143	-14.03	127649	21	395	336
gga-miR-15a	gga_circ_0008944	140	-14.48	140	-14.48	127655	21	451	185
gga-miR-15a	gga_circ_0009081	295	-31.33	148	-16.87	127707	21	387	89 18
gga-miR-15a	gga_circ_0009181	158	-16.21	158	-16.21	127743	21	361	166
gga-miR-15a	gga_circ_0000644	146	-13.95	146	-13.95	127767	21	501	97
gga-miR-15a	gga_circ_0000731	140	-13.67	140	-13.67	127795	21	282	67
gga-miR-15a	gga_circ_0001406	307	-35.22	157	-19.15	127849	21	1213	807 1122
gga-miR-15a	gga_circ_0000189	151	-17.28	151	-17.28	127855	21	458	153
gga-miR-15a	gga_circ_0008295	153	-15.75	153	-15.75	127953	21	290	144
gga-miR-15a	gga_circ_0008467	154	-21.5	154	-21.5	128013	21	363	93
gga-miR-15a	gga_circ_0003440	153	-15.62	153	-15.62	128051	21	308	228
gga-miR-15a	gga_circ_0007374	152	-20.2	152	-20.2	128089	21	185	49
gga-miR-15a	gga_circ_0007408	150	-17.93	150	-17.93	128099	21	282	184
gga-miR-15a	gga_circ_0007423	140	-11.65	140	-11.65	128107	21	258	164
gga-miR-15a	gga_circ_0007527	146	-15.22	146	-15.22	128149	21	382	60
gga-miR-15a	gga_circ_0007578	150	-15.47	150	-15.47	128159	21	327	274
gga-miR-15a	gga_circ_0007635	157	-18.49	157	-18.49	128177	21	240	117
gga-miR-15a	gga_circ_0007680	291	-29.88	147	-15.77	128187	21	424	12 292
gga-miR-15a	gga_circ_0007682	144	-14.11	144	-14.11	128189	21	314	182
gga-miR-15a	gga_circ_0006189	140	-14.56	140	-14.56	128253	21	331	165
gga-miR-15a	gga_circ_0006233	147	-12.7	147	-12.7	128279	21	362	258
gga-miR-15a	gga_circ_0006376	150	-12.13	150	-12.13	128323	21	415	377
gga-miR-15a	gga_circ_0006401	165	-22.2	165	-22.2	128335	21	482	79
gga-miR-15a	gga_circ_0006536	147	-11.14	147	-11.14	128383	21	459	274
gga-miR-15a	gga_circ_0006655	147	-14.88	147	-14.88	128433	21	310	121
gga-miR-15a	gga_circ_0006707	150	-10.22	150	-10.22	128443	21	368	1
gga-miR-15a	gga_circ_0006772	157	-16.14	157	-16.14	128461	21	251	110
gga-miR-15a	gga_circ_0006773	157	-16.14	157	-16.14	128463	21	302	161
gga-miR-15a	gga_circ_0006774	157	-16.14	157	-16.14	128465	21	461	320
gga-miR-15a	gga_circ_0006775	157	-16.14	157	-16.14	128467	21	544	403
gga-miR-15a	gga_circ_0006820	150	-17.02	150	-17.02	128485	21	328	244
gga-miR-15a	gga_circ_0006822	150	-17.02	150	-17.02	128487	21	292	28
gga-miR-15a	gga_circ_0008721	157	-15.25	157	-15.25	128513	21	625	501
gga-miR-15a	gga_circ_0003696	153	-14.03	153	-14.03	128549	21	227	205
gga-miR-15a	gga_circ_0003720	147	-12.07	147	-12.07	128557	21	442	343
gga-miR-15a	gga_circ_0003605	153	-14.23	153	-14.23	128561	21	83	1
gga-miR-15a	gga_circ_0003636	154	-16.77	154	-16.77	128569	21	539	240
gga-miR-15a	gga_circ_0003329	145	-12.91	145	-12.91	128603	21	351	1
gga-miR-15a	gga_circ_0003754	157	-19.12	157	-19.12	128641	21	412	1
gga-miR-15a	gga_circ_0003758	140	-14.96	140	-14.96	128643	21	489	280
gga-miR-15a	gga_circ_0003764	140	-12.81	140	-12.81	128647	21	252	178
gga-miR-15a	gga_circ_0007869	152	-16.99	152	-16.99	128691	21	463	253
gga-miR-15a	gga_circ_0007965	146	-12.89	146	-12.89	128725	21	296	251
gga-miR-15a	gga_circ_0008100	140	-12.97	140	-12.97	128779	21	350	271
gga-miR-15a	gga_circ_0008117	144	-16.6	144	-16.6	128785	21	363	33
gga-miR-15a	gga_circ_0006853	141	-15.02	141	-15.02	128813	21	693	177
gga-miR-15a	gga_circ_0006890	149	-13.66	149	-13.66	128821	21	569	4
gga-miR-15a	gga_circ_0006924	153	-21	153	-21	128833	21	346	177
gga-miR-15a	gga_circ_0007006	152	-17.62	152	-17.62	128875	21	525	483
gga-miR-15a	gga_circ_0007079	147	-12.16	147	-12.16	128897	21	408	21
gga-miR-15a	gga_circ_0007111	158	-20.26	158	-20.26	128907	21	283	249
gga-miR-15a	gga_circ_0007290	143	-15.35	143	-15.35	128983	21	461	10
gga-miR-15a	gga_circ_0007369	153	-14.41	153	-14.41	129009	21	368	102
gga-miR-15a	gga_circ_0005098	144	-19.45	144	-19.45	129047	21	402	265
gga-miR-15a	gga_circ_0005108	140	-11.78	140	-11.78	129055	21	413	129
gga-miR-15a	gga_circ_0005250	149	-14.6	149	-14.6	129131	21	306	158
gga-miR-15a	gga_circ_0005405	143	-15.13	143	-15.13	129179	21	347	50
gga-miR-15a	gga_circ_0005416	145	-15.83	145	-15.83	129191	21	544	192
gga-miR-15a	gga_circ_0005502	142	-13.99	142	-13.99	129219	21	352	39
gga-miR-15a	gga_circ_0005508	142	-13.99	142	-13.99	129221	21	309	239
gga-miR-15a	gga_circ_0005509	142	-13.99	142	-13.99	129223	21	386	316
gga-miR-15a	gga_circ_0005510	142	-13.99	142	-13.99	129225	21	389	319
gga-miR-15a	gga_circ_0005511	142	-13.99	142	-13.99	129227	21	563	493
gga-miR-15a	gga_circ_0005566	152	-14.91	152	-14.91	129257	21	308	284
gga-miR-15a	gga_circ_0005649	140	-10.17	140	-10.17	129293	21	555	476
gga-miR-15a	gga_circ_0005720	157	-19.62	157	-19.62	129327	21	291	159
gga-miR-15a	gga_circ_0005738	146	-14.18	146	-14.18	129341	21	285	7
gga-miR-15a	gga_circ_0005875	145	-14.74	145	-14.74	129401	21	255	44
gga-miR-15a	gga_circ_0003850	305	-30.79	155	-15.67	129533	21	567	77 218
gga-miR-15a	gga_circ_0003882	150	-19.47	150	-19.47	129543	21	204	76
gga-miR-15a	gga_circ_0003940	155	-19.6	155	-19.6	129567	21	296	64
gga-miR-15a	gga_circ_0003944	146	-16.67	146	-16.67	129573	21	367	30
gga-miR-15a	gga_circ_0004016	159	-17.49	159	-17.49	129617	21	478	263
gga-miR-15a	gga_circ_0004019	159	-17.49	159	-17.49	129619	21	315	263
gga-miR-15a	gga_circ_0004060	147	-13.35	147	-13.35	129637	21	505	472
gga-miR-15a	gga_circ_0004200	147	-13.25	147	-13.25	129685	21	247	43
gga-miR-15a	gga_circ_0004248	149	-17	149	-17	129701	21	390	43
gga-miR-15a	gga_circ_0004412	140	-12.73	140	-12.73	129757	21	478	82
gga-miR-15a	gga_circ_0004448	146	-14.12	146	-14.12	129771	21	452	380
gga-miR-15a	gga_circ_0004494	160	-18.85	160	-18.85	129785	21	231	57
gga-miR-15a	gga_circ_0004533	154	-15.31	154	-15.31	129805	21	290	50
gga-miR-15a	gga_circ_0004541	140	-15.22	140	-15.22	129809	21	484	164
gga-miR-15a	gga_circ_0004542	140	-15.22	140	-15.22	129811	21	588	268
gga-miR-15a	gga_circ_0004543	140	-15.22	140	-15.22	129813	21	337	164
gga-miR-15a	gga_circ_0004544	140	-15.22	140	-15.22	129815	21	518	345
gga-miR-15a	gga_circ_0004545	140	-15.22	140	-15.22	129817	21	520	347
gga-miR-15a	gga_circ_0004546	140	-15.22	140	-15.22	129819	21	370	268
gga-miR-15a	gga_circ_0004764	155	-15.17	155	-15.17	129883	21	304	228
gga-miR-15a	gga_circ_0004774	145	-15.93	145	-15.93	129887	21	316	229
gga-miR-15a	gga_circ_0004779	149	-15.67	149	-15.67	129893	21	263	170
gga-miR-15a	gga_circ_0004829	160	-19.07	160	-19.07	129923	21	262	230
gga-miR-15a	gga_circ_0004886	140	-12.03	140	-12.03	129945	21	461	280
gga-miR-15a	gga_circ_0004890	140	-12.03	140	-12.03	129947	21	405	224
gga-miR-15a	gga_circ_0004903	288	-28.26	148	-16.24	129951	21	328	237 88
gga-miR-15a	gga_circ_0004906	140	-12.02	140	-12.02	129953	21	118	88
gga-miR-15a	gga_circ_0004953	163	-15.06	163	-15.06	129975	21	319	249
gga-miR-15a	gga_circ_0004990	143	-13.79	143	-13.79	129985	21	603	9
gga-miR-15a	gga_circ_0002242	156	-20.89	156	-20.89	130249	21	604	248
gga-miR-15a	gga_circ_0002289	143	-13.59	143	-13.59	130269	21	327	260
gga-miR-15a	gga_circ_0002301	144	-11.98	144	-11.98	130273	21	291	69
gga-miR-15a	gga_circ_0002323	141	-14.36	141	-14.36	130277	21	370	118
gga-miR-15a	gga_circ_0002440	169	-19.67	169	-19.67	130323	21	386	78
gga-miR-15a	gga_circ_0002441	169	-19.67	169	-19.67	130325	21	428	107
gga-miR-15a	gga_circ_0002454	149	-15.12	149	-15.12	130327	21	221	158
gga-miR-15a	gga_circ_0002521	140	-11.45	140	-11.45	130361	21	300	48
gga-miR-15a	gga_circ_0002538	153	-19.1	153	-19.1	130377	21	531	174
gga-miR-15a	gga_circ_0002615	145	-15.62	145	-15.62	130409	21	400	258
gga-miR-15a	gga_circ_0002741	146	-17.78	146	-17.78	130457	21	336	59
gga-miR-15a	gga_circ_0002838	145	-12.87	145	-12.87	130493	21	357	66
gga-miR-15a	gga_circ_0002917	151	-14.9	151	-14.9	130513	21	621	297
gga-miR-15a	gga_circ_0002922	151	-14.9	151	-14.9	130517	21	369	45
gga-miR-15a	gga_circ_0002967	151	-13.83	151	-13.83	130533	21	338	78
gga-miR-15a	gga_circ_0002999	144	-12.24	144	-12.24	130543	21	491	26
gga-miR-15a	gga_circ_0003004	154	-20.62	154	-20.62	130549	21	350	212
gga-miR-15a	gga_circ_0003050	149	-12.98	149	-12.98	130567	21	549	406
gga-miR-15a	gga_circ_0003106	165	-20.93	165	-20.93	130595	21	828	675
gga-miR-15a	gga_circ_0003228	147	-15.48	147	-15.48	130641	21	415	29
gga-miR-15a	gga_circ_0008546	147	-14.71	147	-14.71	130687	21	519	444
gga-miR-15a	gga_circ_0008553	142	-12.18	142	-12.18	130689	21	332	245
gga-miR-15a	gga_circ_0008571	147	-14.19	147	-14.19	130697	21	390	112
gga-miR-15a	gga_circ_0008615	140	-15.71	140	-15.71	130709	21	372	320
gga-miR-15a	gga_circ_0000154	149	-16.39	149	-16.39	130747	21	264	9
gga-miR-26a-5p	gga_circ_0000874	146	-10.88	146	-10.88	130797	21	289	231
gga-miR-26a-5p	gga_circ_0000474	140	-12.34	140	-12.34	130825	21	420	43
gga-miR-26a-5p	gga_circ_0000517	144	-12.83	144	-12.83	130843	21	330	108
gga-miR-26a-5p	gga_circ_0000518	144	-12.83	144	-12.83	130845	21	361	108
gga-miR-26a-5p	gga_circ_0000234	145	-12.79	145	-12.79	130881	21	276	251
gga-miR-26a-5p	gga_circ_0001077	147	-14.33	147	-14.33	131013	21	324	245
gga-miR-26a-5p	gga_circ_0008862	141	-11.95	141	-11.95	131153	21	321	278
gga-miR-26a-5p	gga_circ_0009042	161	-16.9	161	-16.9	131227	21	442	127
gga-miR-26a-5p	gga_circ_0000110	155	-15.55	155	-15.55	131435	21	346	108
gga-miR-26a-5p	gga_circ_0008352	149	-14.3	149	-14.3	131507	21	612	289
gga-miR-26a-5p	gga_circ_0006684	153	-18.14	153	-18.14	131973	21	316	57
gga-miR-26a-5p	gga_circ_0008019	153	-16.58	153	-16.58	132279	21	253	147
gga-miR-26a-5p	gga_circ_0008075	140	-10.89	140	-10.89	132305	21	370	136
gga-miR-26a-5p	gga_circ_0006971	143	-10.28	143	-10.28	132389	21	286	97
gga-miR-26a-5p	gga_circ_0007334	149	-14.37	149	-14.37	132529	21	475	339
gga-miR-26a-5p	gga_circ_0005260	152	-11.26	152	-11.26	132669	21	408	16
gga-miR-26a-5p	gga_circ_0005416	145	-13.73	145	-13.73	132725	21	544	488
gga-miR-26a-5p	gga_circ_0005449	150	-13.57	150	-13.57	132733	21	270	121
gga-miR-26a-5p	gga_circ_0005487	140	-15.19	140	-15.19	132741	21	354	158
gga-miR-26a-5p	gga_circ_0005591	144	-10.88	144	-10.88	132799	21	617	385
gga-miR-26a-5p	gga_circ_0004419	143	-12.56	143	-12.56	133293	21	269	62
gga-miR-26a-5p	gga_circ_0004987	146	-17.34	146	-17.34	133517	21	269	227
gga-miR-26a-5p	gga_circ_0001765	150	-12.37	150	-12.37	133609	21	453	424
gga-miR-26a-5p	gga_circ_0001862	161	-16.38	161	-16.38	133651	21	844	540
gga-miR-26a-5p	gga_circ_0001865	160	-16.36	160	-16.36	133655	21	707	157
gga-miR-26a-5p	gga_circ_0002093	155	-14.31	155	-14.31	133721	21	447	359
gga-miR-26a-5p	gga_circ_0002152	142	-13.35	142	-13.35	133745	21	378	337
gga-miR-26a-5p	gga_circ_0002154	142	-13.35	142	-13.35	133747	21	398	357
gga-miR-26a-5p	gga_circ_0002282	140	-11.31	140	-11.31	133801	21	297	1
gga-miR-26a-5p	gga_circ_0002838	153	-15.41	153	-15.41	134027	21	357	132
gga-miR-26a-5p	gga_circ_0003009	151	-10.08	151	-10.08	134085	21	444	333
gga-miR-26a-5p	gga_circ_0003234	151	-15.47	151	-15.47	134177	21	491	171
gga-miR-26a-3p	gga_circ_0008920	151	-11.72	151	-11.72	134711	23	329	175
gga-miR-26a-3p	gga_circ_0009064	150	-10.34	150	-10.34	134769	23	292	124
gga-miR-26a-3p	gga_circ_0008394	146	-10.76	146	-10.76	135057	23	255	22
gga-miR-26a-3p	gga_circ_0007374	146	-10.71	146	-10.71	135157	23	185	101
gga-miR-26a-3p	gga_circ_0006602	161	-17.77	161	-17.77	135475	23	256	120
gga-miR-26a-3p	gga_circ_0007911	168	-19.15	168	-19.15	135773	23	464	382
gga-miR-26a-3p	gga_circ_0008160	160	-16.38	160	-16.38	135863	23	528	251
gga-miR-26a-3p	gga_circ_0007031	147	-10.55	147	-10.55	135949	23	394	110
gga-miR-26a-3p	gga_circ_0005458	148	-10.54	148	-10.54	136273	23	197	12
gga-miR-26a-3p	gga_circ_0005492	147	-10.7	147	-10.7	136279	23	426	196
gga-miR-26a-3p	gga_circ_0005496	147	-10.7	147	-10.7	136281	23	318	92
gga-miR-26a-3p	gga_circ_0006077	152	-11.54	152	-11.54	136555	23	546	474
gga-miR-26a-3p	gga_circ_0003884	148	-17.2	148	-17.2	136613	23	446	275
gga-miR-26a-3p	gga_circ_0003886	148	-17.2	148	-17.2	136615	23	600	429
gga-miR-26a-3p	gga_circ_0004853	154	-12.63	154	-12.63	137003	23	290	37
gga-miR-26a-3p	gga_circ_0004972	147	-10.81	147	-10.81	137047	23	210	4
gga-miR-26a-3p	gga_circ_0001575	158	-15.3	158	-15.3	137079	23	207	112
gga-miR-26a-3p	gga_circ_0002694	153	-18.23	153	-18.23	137513	23	770	656
gga-miR-26a-3p	gga_circ_0002699	153	-18.23	153	-18.23	137517	23	681	567
gga-miR-26a-3p	gga_circ_0002744	160	-21.09	160	-21.09	137527	23	511	244
gga-miR-26a-3p	gga_circ_0008666	150	-10.3	150	-10.3	137793	23	304	5
gga-miR-26a-3p	gga_circ_0008667	150	-10.3	150	-10.3	137795	23	317	5
gga-miR-153-5p	gga_circ_0000906	148	-18.11	148	-18.11	137877	22	360	148
gga-miR-153-5p	gga_circ_0000525	167	-15.7	167	-15.7	137917	22	593	274
gga-miR-153-5p	gga_circ_0000211	150	-13.54	150	-13.54	137941	22	467	45
gga-miR-153-5p	gga_circ_0000212	150	-13.54	150	-13.54	137943	22	337	45
gga-miR-153-5p	gga_circ_0000284	158	-11.35	158	-11.35	137971	22	539	230
gga-miR-153-5p	gga_circ_0000292	152	-12.25	152	-12.25	137973	22	209	136
gga-miR-153-5p	gga_circ_0000413	157	-16.27	157	-16.27	138023	22	216	11
gga-miR-153-5p	gga_circ_0001077	164	-16.3	164	-16.3	138081	22	324	175
gga-miR-153-5p	gga_circ_0001100	145	-10.59	145	-10.59	138085	22	502	300
gga-miR-153-5p	gga_circ_0001128	150	-16.23	150	-16.23	138103	22	290	130
gga-miR-153-5p	gga_circ_0001130	157	-18.74	157	-18.74	138105	22	196	85
gga-miR-153-5p	gga_circ_0008891	148	-10.52	148	-10.52	138233	22	637	591
gga-miR-153-5p	gga_circ_0008995	303	-22.6	152	-11.57	138275	22	441	48 361
gga-miR-153-5p	gga_circ_0009026	151	-10.37	151	-10.37	138289	22	286	81
gga-miR-153-5p	gga_circ_0009070	162	-15.06	162	-15.06	138305	22	498	369
gga-miR-153-5p	gga_circ_0009104	156	-10.8	156	-10.8	138315	22	508	90
gga-miR-153-5p	gga_circ_0009107	148	-10.36	148	-10.36	138317	22	430	211
gga-miR-153-5p	gga_circ_0000655	153	-10.59	153	-10.59	138373	22	454	137
gga-miR-153-5p	gga_circ_0008289	153	-11.34	153	-11.34	138551	22	350	181
gga-miR-153-5p	gga_circ_0003485	156	-10.04	156	-10.04	138673	22	254	29
gga-miR-153-5p	gga_circ_0000017	154	-16.53	154	-16.53	138681	22	285	102
[truncated: 58,144 more rows]
